# Supplementary material for: Direct Csp2–H enolization: an allenoate alkylation cascade toward the assembly of multi-substituted furans
Source: Royal Society of Chemistry journal article supplement (doi:10.1039/c7ob00248c), 2017-01-01
Supplement: c7ob00248c1.pdf [file c7ob00248c1.pdf]

## Direct C<sub>sp2</sub>-H Enolization: An Allenoate Alkylation Cascade Toward the Assembly of Multi-substituted Furans

Debanjan Bakshi, Anand Singh\*

Department of Chemistry, Indian Institute of Technology Kanpur, Kanpur 208016, India

### Table of contents

|                                                                             |       |
|-----------------------------------------------------------------------------|-------|
| Materials and methods.....                                                  | SI-1  |
| Synthesis of precursors .....                                               | SI-2  |
| General procedures for furan formation.....                                 | SI-2  |
| Additional Optimization Experiments.....                                    | SI-2  |
| Characterization of furan products.....                                     | SI-3  |
| Copies of <sup>1</sup> H and <sup>13</sup> C spectra of furan products..... | SI-13 |
| References.....                                                             | SI-46 |

### 1. General Information.

All the reactions were performed in flame dried glassware using dry solvents. DMF was distilled from neutral alumina and CaH<sub>2</sub> prior to use. All other chemicals were obtained from commercial sources and used directly without further purification. Yields refer to chromatographically pure material. Reactions were monitored by thin-layer chromatography (TLC) carried out on 0.25 mm Merck TLC Silica gel 60F<sub>254</sub>, precoated on aluminium sheets using UV light as a visualizing agent and KMnO<sub>4</sub> stain, and heat as developing agents. Merck silica gel (particle size 100-200 and 230-400 mesh) was used for flash column chromatography.

NMR spectra were recorded on Bruker Avance 500 (<sup>1</sup>H: 500 MHz, <sup>13</sup>C: 125 MHz) or 400 (<sup>1</sup>H: 400 MHz, <sup>13</sup>C: 100 MHz) in CDCl<sub>3</sub> having TMS 0.03% as internal standard. Mass spectrometric data were obtained using WATERS-Q-TOF Premier-ESI-MS.

The following abbreviations were used to explain the multiplicities: s = singlet, d = doublet, t = triplet, q = quartet, dd = doublet of doublet, ddd = doublet of a doublet of doublet.

## 2. Synthesis of Starting Materials.

The bromo- and iodo-electrophiles were synthesized using known procedures.<sup>1a-d</sup> Allene-1,3-dicarboxylate was prepared as reported by Node et. al.<sup>2</sup>

## 3. General Procedures for Furan Formation:

**Method-A:** Allenoate **1**, TBAB (1 equiv.) and  $\alpha$ -bromo or  $\alpha$ -iodo ketone (2 equiv.) were added in vial. Toluene (2 mL) was added followed by the addition of  $K_2CO_3$  (10 equiv.). The reaction mixture was stirred in a closed vial for 24 h. After completion of the reaction (as monitored by TLC analysis), the reaction mixture was poured in a separating funnel and extracted with EtOAc thrice. The combined organic layers were washed with brine, dried over  $Na_2SO_4$  and concentrated under reduced pressure. The residue was purified by column chromatography (solvent system - EtOAc/ petroleum ether) on silica gel.

**Method-B:** Allenoate **1**, 18-Crown-6 (2 equiv.), AgOTf (2 equiv.) and  $\alpha$ -bromo ketone (2 equiv.) were added in vial. Toluene (2 ml) was added followed by the addition of  $K_2CO_3$  (10 equiv.). The reaction mixture was stirred in a closed vial for 24 h. After completion of the reaction (as monitored by TLC analysis), the reaction mixture was poured in a separating funnel and extracted with EtOAc thrice. The combined organic layers were washed with brine, dried over  $Na_2SO_4$  and concentrated under reduced pressure. The residue was purified by column chromatography (solvent system - EtOAc/ petroleum ether) on silica gel.

**Method-C:** Allenoate **1**, TBAB (3 equiv.) and  $\alpha$ -iodo ketone (2.5 equiv.) were added in vial. Acetonitrile (2 ml) was added followed by the addition of  $K_2CO_3$  (3 equiv.). The reaction mixture was stirred in a closed vial for 24 hrs. After completion of the reaction (as monitored by TLC analysis), the reaction mixture was poured in a separating funnel and extracted with EtOAc thrice. The combined organic layers were washed with brine, dried over  $Na_2SO_4$  and concentrated under reduced pressure. The residue was purified by column chromatography (solvent system - EtOAc/ petroleum ether) on silica gel.

## 4. Additional Optimization Experiments

In addition to experiments in table 1, various bases and ammonium salts were evaluated in this reaction in order to explore the improvement in the selectivity favoring products **3**. The outcome of those experiments is shown below in table 1s and table 2s.

Table 1s: Evaluation of other bases in the reaction

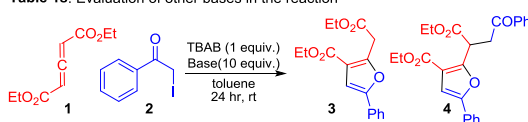

| entry <sup>a</sup> | <b>2</b><br>(equiv.) | Base              | TBAB<br>(equiv.) | % yield<br>( <b>3</b> ) | % yield<br>( <b>4</b> ) |
|--------------------|----------------------|-------------------|------------------|-------------------------|-------------------------|
| 1 <sup>b,c</sup>   | 2                    | <sup>t</sup> BuOK | 1                | -                       | -                       |
| 2 <sup>c</sup>     | 2                    | DBU               | 1                | -                       | -                       |
| 3 <sup>d</sup>     | 2                    | $CS_2CO_3$        | 1                | 36                      | 32                      |
| 4 <sup>e</sup>     | 2                    | $K_2CO_3$         | 1                | 62                      | 23                      |
| 5                  | 2                    | $K_3PO_4$         | 1                | 34                      | 16                      |

<sup>a</sup>Reaction Conditions: **1** (0.22 mmol), **2** (0.44 mmol), TBAB (0.22 mmol),

base (2.2 mmol), solvent (2 mL; 0.11 M) for 24 h at rt.

<sup>b</sup>2 equiv. of <sup>t</sup>BuOK was employed.

<sup>c</sup>Complex mixture was obtained

<sup>d</sup>Reaction was complete after 6 hrs.

<sup>e</sup>When performed at 100 °C, this reaction reaction provided **3** (33%) and **4** (22%)

Table 2s: Evaluation of other ammonium salts in the reaction

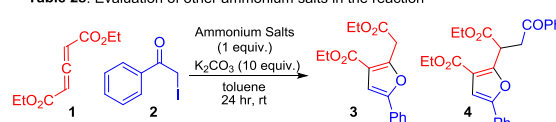

| entry | <b>2</b><br>(equiv.) | Ammonium Salts      | % yield<br>( <b>3</b> ) | % yield<br>( <b>4</b> ) |
|-------|----------------------|---------------------|-------------------------|-------------------------|
| 1     | 2                    | TBAClO <sub>4</sub> | 47                      | 18                      |
| 2     | 2                    | TBAHSO <sub>4</sub> | 40                      | 12                      |
| 3     | 2                    | TBANO <sub>3</sub>  | 35                      | 9                       |
| 4     | 2                    | TBAI                | 46                      | 12                      |
| 5     | 2                    | TBAB                | 62                      | 23                      |
| 6     | 2                    | TMAI <sup>b</sup>   | 20                      | 38                      |

<sup>a</sup>Reaction Conditions: **1** (0.22 mmol), **2** (0.44 mmol),

ammonium salts (0.22 mmol), base (2.2 mmol),

PhCH<sub>3</sub> (2 mL; 0.11 M) for 24 h at rt.

<sup>b</sup>TMAI = tetramethylammonium iodide

## Characterization of Products:

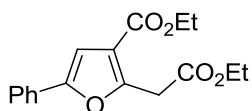

**Ethyl 2-(2-ethoxy-2-oxoethyl)-5-phenylfuran-3-carboxylate (3a):** According to the method A, allenolate **1** (40 mg, 217  $\mu\text{mol}$ ) and 2-iodo-1-phenylethanone (107 mg, 434  $\mu\text{mol}$ ) provided **3a** as a colorless oil (44 mg, 67%) and **4a** as a yellow oil (20 mg, 22%) after flash column chromatography (5% ethyl acetate in petroleum ether).  $R_f = 0.70$  (10% ethyl acetate in petroleum ether). **IR** (neat):  $\nu_{\text{max}}/\text{cm}^{-1}$  3130, 2982, 1745, 1714.  $^1\text{H}$  NMR (400 MHz, Chloroform-*d*)  $\delta = 7.64$  (d,  $J = 7.2$  Hz, 2H), 7.37 (t,  $J = 7.6$  Hz, 2H), 7.30 – 7.25 (m, 1H), 6.93 (s, 1H), 4.30 (q,  $J = 7.1$  Hz, 2H), 4.19 (q,  $J = 7.1$  Hz, 2H), 4.11 (s, 2H), 1.35 (t,  $J = 7.1$  Hz, 3H), 1.26 (t,  $J = 7.1$  Hz, 3H).  $^{13}\text{C}$  NMR (100 MHz Chloroform-*d*)  $\delta$  168.7, 163.5, 153.5, 153.1, 129.9, 128.8, 128.1, 124.0, 117.6, 105.6, 77.5, 77.1, 76.8, 61.4, 60.6, 34.1, 14.4, 14.2. Exact mass calculated  $\text{C}_{17}\text{H}_{19}\text{O}_5^+$   $[\text{M}+\text{H}]^+$ : 303.1232; found: 303.1237.

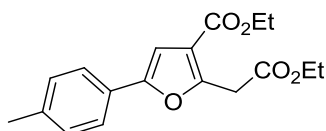

**Ethyl 2-(2-ethoxy-2-oxoethyl)-5-p-tolylfuran-3-carboxylate (3b):** According to the method A, allenolate **1** (40 mg, 217  $\mu\text{mol}$ ) and 2-iodo-1-p-tolyloethanone (113 mg, 434  $\mu\text{mol}$ ) provided **3b** as a colorless oil (36 mg, 52%) and **4b** as a yellow liquid (20 mg, 20%) after flash column chromatography (5% ethyl acetate in petroleum ether).  $R_f = 0.51$  (10% ethyl acetate in petroleum ether). **IR** (neat):  $\nu_{\text{max}}/\text{cm}^{-1}$  2927, 2981, 1716, 1742.  $^1\text{H}$  NMR (400 MHz, Chloroform-*d*)  $\delta$  7.53 (d,  $J = 8.1$  Hz, 2H), 7.18 (d,  $J = 8.0$  Hz, 2H), 6.86 (s, 1H), 4.29 (q,  $J = 7.2$  Hz, 2H), 4.18 (q,  $J = 7.1$  Hz, 2H), 4.09 (s, 2H), 2.35 (s, 3H), 1.34 (t,  $J = 7.2$  Hz, 3H), 1.25 (t,  $J = 7.1$  Hz, 3H).  $^{13}\text{C}$  NMR (100 MHz, Chloroform-*d*)  $\delta$  168.8, 163.6, 153.4, 153.1, 138.0, 129.5, 127.2, 124.0, 117.5, 104.9, 61.4, 60.5, 34.1, 21.4, 14.4, 14.2. Exact mass calculated  $\text{C}_{18}\text{H}_{21}\text{O}_5^+$   $[\text{M}+\text{H}]^+$ : 317.1389; found: 317.1389.

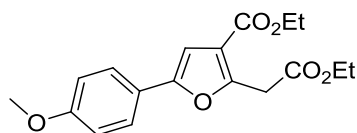

**Ethyl 2-(2-ethoxy-2-oxoethyl)-5-(4-methoxyphenyl)furan-3-carboxylate (3c):** According to the method A, allenolate **1** (40 mg, 217  $\mu\text{mol}$ ) and 2-iodo-1-(4-methoxyphenyl)ethanone (120 mg, 434  $\mu\text{mol}$ ) provided **3c** as a colorless oil (27 mg, 38%) and **4c** as a yellow liquid (24 mg, 23%) after flash column chromatography (10% ethyl acetate in petroleum ether).  $R_f = 0.31$  (10% ethyl acetate in petroleum ether). **IR** (neat):  $\nu_{\text{max}}/\text{cm}^{-1}$  2932, 2981, 1741, 1714, 1234.  $^1\text{H}$  NMR (400 MHz, Chloroform-*d*)  $\delta$  7.56 (d,  $J = 8.9$  Hz, 2H), 6.90 (d,  $J = 9.0$  Hz, 2H), 6.78 (s, 1H), 4.29 (q,  $J = 7.1$  Hz, 2H), 4.18 (q,  $J = 7.1$  Hz, 2H), 4.09 (s, 2H), 3.82 (s, 3H), 1.34 (t,  $J = 7.1$  Hz, 3H), 1.25 (t,  $J = 7.1$  Hz, 3H).  $^{13}\text{C}$  NMR (100 MHz, Chloroform-*d*)  $\delta$  168.8, 163.6, 159.6, 153.2, 152.8, 125.5, 122.9, 117.5, 114.2, 104.0, 61.4, 60.5, 55.4, 34.1, 14.4, 14.2. Exact mass calculated  $\text{C}_{18}\text{H}_{21}\text{O}_6^+$   $[\text{M}+\text{H}]^+$ : 333.1338; found: 333.1336.

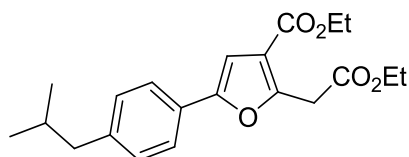

**Ethyl 2-(2-ethoxy-2-oxoethyl)-5-(4-isobutylphenyl)furan-3-carboxylate (3d):** According to the method A, allenolate **1** (40 mg, 217  $\mu\text{mol}$ ) and 2-iodo-1-(4-isobutylphenyl)ethanone (131 mg, 434  $\mu\text{mol}$ ) provided **3d** as a colorless oil (31 mg, 40%) and **4d** as a yellow liquid (33 mg, 28%) after flash column chromatography (5% ethyl

acetate in petroleum ether).  $R_f = 0.54$  (10% ethyl acetate in petroleum ether). **IR** (neat):  $\nu_{\max}/\text{cm}^{-1}$  2958, 2927, 1744, 1716, 1233.  $^1\text{H NMR}$  (400 MHz, Chloroform-*d*)  $\delta = 7.55$  (d,  $J = 8.3$ , 2H), 7.15 (d,  $J = 8.3$  Hz, 2H), 6.87 (s, 1H), 4.30 (q,  $J = 7.1$  Hz, 2H), 4.18 (q,  $J = 7.1$  Hz, 2H), 4.10 (s, 2H), 2.47 (d,  $J = 7.2$  Hz, 2H), 1.91 – 1.80 (m, 1H), 1.34 (t,  $J = 7.1$  Hz, 3H), 1.25 (t,  $J = 7.1$  Hz, 3H), 0.89 (s, 6H).  $^{13}\text{C NMR}$  (100 MHz, Chloroform-*d*)  $\delta$  168.8, 163.6, 153.4, 153.1, 141.9, 129.6, 127.4, 123.8, 117.5, 104.9, 61.4, 60.6, 45.3, 34.2, 30.3, 22.4, 14.4, 14.3. Exact mass calculated  $\text{C}_{21}\text{H}_{27}\text{O}_5^+ [\text{M}+\text{H}]^+$ : 359.1858; found: 359.1857.

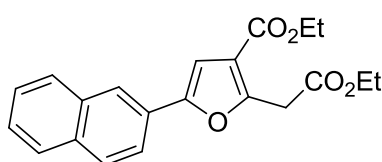

**Ethyl 2-(2-ethoxy-2-oxoethyl)-5-(naphthalen-2-yl)furan-3-carboxylate (3e):** According to the method A, allenolate **1** (40 mg, 217  $\mu\text{mol}$ ) and 2-iodo-1-(naphthalen-2-yl)ethanone (129 mg, 434  $\mu\text{mol}$ ) provided **3e** as a colorless oil (39mg, 51%) and **4e** as a yellow liquid (26 mg, 23%) after flash column

chromatography (5% ethyl acetate in petroleum ether).  $R_f = 0.70$  (10% ethyl acetate in petroleum ether) **IR** (neat):  $\nu_{\max}/\text{cm}^{-1}$  2981, 2931, 1741, 1714.  $^1\text{H NMR}$  (400 MHz, Chloroform-*d*)  $\delta = 8.12$  (s, 1H), 7.86 – 7.78 (m, 3H), 7.72 (dd,  $J = 8.6$ , 1.7 Hz, 1H), 7.51 – 7.42 (m, 2H), 7.05 (s, 1H), 4.32 (q,  $J = 7.1$  Hz, 2H), 4.22 (q,  $J = 7.1$  Hz, 2H), 4.16 (s, 2H), 1.37 (t,  $J = 7.1$  Hz, 3H), 1.28 (t,  $J = 7.1$  Hz, 3H).  $^{13}\text{CNMR}$  (100 MHz, Chloroform-*d*)  $\delta$  168.7, 163.5, 153.7, 153.2, 133.4, 133.0, 128.6, 128.3, 127.9, 127.1, 126.7, 126.3, 122.6, 122.1, 117.8, 106.2, 61.5, 60.6, 34.2, 14.4, 14.3. Exact mass calculated  $\text{C}_{21}\text{H}_{21}\text{O}_5^+ [\text{M}+\text{H}]^+$ : 353.1389; found: 353.1387.

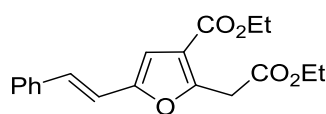

**Ethyl -2-(2-ethoxy-2-oxoethyl)-5-styrylfuran-3-carboxylate (3f):** According to the method A allenolate **1** (40 mg, 217  $\mu\text{mol}$ ) and 1-iodo-4-phenylbut-3-en-2-one (118 mg, 434  $\mu\text{mol}$ ) provided **3f** as a colorless oil (28mg, 40%) and **4f** as a yellow liquid (27 mg, 26%)

after flash column chromatography (5% ethyl acetate in petroleum ether).  $R_f = 0.50$  (10% ethyl acetate in petroleum ether). **IR** (neat):  $\nu_{\max}/\text{cm}^{-1}$  2961, 2926, 1714, 1738, 1259.  $^1\text{H NMR}$  (400 MHz, Chloroform-*d*)  $\delta$  7.44 (d,  $J = 7.4$  Hz, 2H), 7.33 (t,  $J = 7.5$  Hz, 2H), 7.25 (d,  $J = 6.9$  Hz, 1H), 7.03 (d,  $J = 16.3$  Hz, 1H), 6.80 (d,  $J = 16.3$  Hz, 1H), 6.62 (s, 1H), 4.28 (q,  $J = 7.2$  Hz, 2H), 4.19 (q,  $J = 7.2$  Hz, 2H), 4.08 (s, 2H), 1.33 (t,  $J = 7.1$  Hz, 3H), 1.26 (t,  $J = 7.2$  Hz, 3H).  $^{13}\text{CNMR}$  (100 MHz, Chloroform-*d*)  $\delta$  168.7, 163.4, 153.6, 152.4, 136.6, 128.8, 128.0, 126.5, 117.5, 115.6, 108.7, 61.5, 60.6, 34.2, 14.4, 14.3. Exact mass calculated  $\text{C}_{19}\text{H}_{21}\text{O}_5^+ [\text{M}+\text{H}]^+$ : 329.1389; found: 329.1389.

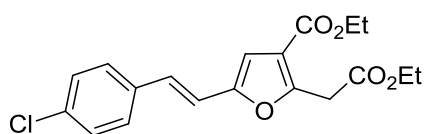

**Ethyl -5-(4-chlorostyryl)-2-(2-ethoxy-2-oxoethyl)furan-3-carboxylate (3g):** According to the method A, allenolate **1** (40 mg, 217  $\mu\text{mol}$ ) and 4-(4-chlorophenyl)-1-iodobut-3-en-2-one (133 mg, 434  $\mu\text{mol}$ ) provided **3g** as a colorless oil (32 mg, 40%) and **4g** as a yellow liquid (24 mg, 20%) after

flash column chromatography (10% ethyl acetate in petroleum ether).  $R_f = 0.36$  (10% ethyl acetate in petroleum ether). **IR** (neat):  $\nu_{\max}/\text{cm}^{-1}$  2980, 2927, 1741, 1715, 1230, 1188.  $^1\text{H NMR}$  (400 MHz, Chloroform-*d*)  $\delta$  7.36 (d,  $J = 8.4$  Hz, 2H), 7.29 (d,  $J = 8.6$  Hz, 2H), 6.97 (d,  $J = 16.3$  Hz, 1H), 6.76 (d,  $J = 16.2$  Hz, 1H), 6.62 (s, 1H), 4.28 (q,  $J = 7.1$  Hz, 2H), 4.19 (q,  $J = 7.2$  Hz, 2H), 4.07 (s, 2H), 1.33 (t,  $J = 7.1$  Hz, 3H), 1.26 (t,  $J = 7.2$  Hz, 3H).  $^{13}\text{CNMR}$  (100 MHz,

Chloroform-*d*)  $\delta$  168.6, 163.3, 153.8, 152.0, 135.1, 133.6, 129.5, 129.4, 129.0, 127.7, 127.3, 117.6, 116.1, 109.2, 61.5, 60.6, 34.1, 14.4. Exact mass calculated  $C_{19}H_{20}ClO_5^+$   $[M+H]^+$ : 363.0999; found: 363.0990.

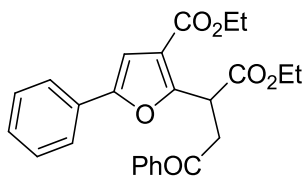

**Ethyl 2-(1-ethoxy-1,4-dioxo-4-phenylbutan-2-yl)-5-phenylfuran-3-carboxylate (4a):** According to the method C, allenolate **1** (40 mg, 217  $\mu$ mol) and 2-iodo-1-phenylethanone (134 mg, 542  $\mu$ mol) provided **4a** after flash column chromatography (10% ethyl acetate in petroleum ether) as a yellow liquid (70 mg, 78%).  $R_f$  = 0.45 (10% ethyl acetate in petroleum ether). **IR** (neat):  $\nu_{max}/cm^{-1}$  3051, 2960, 2925, 1715, 1738.  $^1H$  NMR (500 MHz, Chloroform-*d*)  $\delta$  = 8.00 (d,

$J$  = 7.6 Hz, 2H), 7.60 (d,  $J$  = 7.6 Hz, 2H), 7.56 (d,  $J$  = 7.5 Hz, 1H), 7.46 (t,  $J$  = 7.7 Hz, 2H), 7.37 (t,  $J$  = 7.7 Hz, 2H), 7.28 (t,  $J$  = 7.3 Hz, 1H), 6.95 (s, 1H), 5.27 (dd,  $J$  = 8.7, 5.2 Hz, 1H), 4.39 – 4.28 (m, 2H), 4.20 (q,  $J$  = 7.1 Hz, 2H), 4.04 (dd,  $J$  = 17.7, 8.7 Hz, 1H), 3.43 (dd,  $J$  = 17.7, 5.2 Hz, 1H), 1.37 (t,  $J$  = 7.1 Hz, 3H), 1.22 (t,  $J$  = 7.1 Hz, 3H).  $^{13}C$  NMR (125 MHz, Chloroform-*d*)  $\delta$  196.7, 170.3, 163.3, 156.3, 153.0, 136.5, 133.4, 129.7, 128.8, 128.7, 128.2, 128.2, 124.0, 116.9, 105.9, 61.7, 60.7, 40.2, 39.2, 14.4, 14.2. Exact mass calculated  $C_{25}H_{25}O_6^+$   $[M+H]^+$ : 421.1651; found: 421.1650.

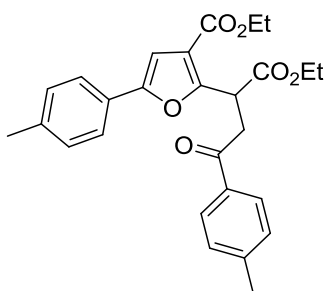

**Ethyl 2-(1-ethoxy-1,4-dioxo-4-p-tolylbutan-2-yl)-5-p-tolylfuran-3-carboxylate (4b):** According to the method C, allenolate **1** (40 mg, 217  $\mu$ mol) and 2-iodo-1-p-tolyloethanone (141 mg, 543  $\mu$ mol) provided **4b** after flash column chromatography (10% ethyl acetate in petroleum ether) as a yellow liquid (70 mg, 72%).  $R_f$  = 0.37 (10% ethyl acetate in petroleum ether). **IR** (neat):  $\nu_{max}/cm^{-1}$  2960, 2922, 1714, 1681.  $^1H$  NMR (400 MHz, Chloroform-*d*)  $\delta$  = 7.89 (d,  $J$  = 8.2 Hz, 2H), 7.48 (d,  $J$  = 8.1 Hz, 2H), 7.24 (d,  $J$  = 8.0 Hz, 2H), 7.16 (d,  $J$  = 8.0 Hz, 2H), 6.87 (s, 1H), 5.24 (dd,  $J$  = 8.7, 5.1, 1H), 4.31 (m, 2H), 4.19 (q,  $J$  = 7.1,

2H), 4.00 (dd,  $J$  = 17.7, 8.8 Hz, 1H), 3.40 (dd,  $J$  = 17.6, 5.1 Hz, 1H), 2.39 (s, 3H), 2.34 (s, 3H), 1.35 (t,  $J$  = 7.1 Hz, 3H), 1.20 (t,  $J$  = 7.1, 3H).  $^{13}C$  NMR (100 MHz, Chloroform-*d*)  $\delta$  196.3, 170.5, 163.4, 156.0, 153.2, 144.2, 138.1, 134.0, 129.5, 129.4, 128.4, 127.1, 123.9, 116.8, 105.1, 77.5, 61.6, 60.7, 40.2, 39.1, 21.8, 21.4, 14.4, 14.2. Exact mass calculated  $C_{27}H_{29}O_6^+$   $[M+H]^+$  : 449.1964; found: 449.1961.

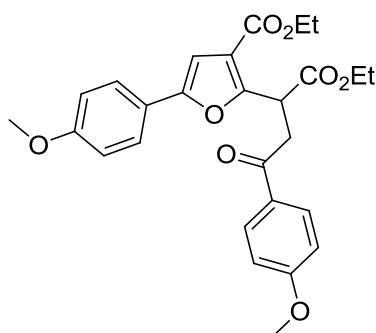

**Ethyl 2-(1-ethoxy-4-(4-methoxyphenyl)-1,4-dioxobutan-2-yl)-5-(4-methoxyphenyl)furan-3-carboxylate (4c):** According to the method C, allenolate **1** (40 mg, 217  $\mu$ mol) and 2-iodo-1-(4-methoxyphenyl)ethanone (150 mg, 543  $\mu$ mol) provided **4c** after flash column chromatography (20% ethyl acetate in petroleum ether) as a yellow liquid (73 mg, 70%).  $R_f$  = 0.15 (10% ethyl acetate in petroleum ether). **IR** (neat):  $\nu_{max}/cm^{-1}$  2979, 2935, 1714, 1680, 1258, 1173.  $^1H$  NMR (400 MHz, Chloroform-*d*)  $\delta$  7.96 (d,  $J$  = 8.9 Hz, 2H), 7.51 (d,  $J$  = 8.8 Hz, 2H), 6.91 (d,  $J$  =

8.9 Hz, 2H), 6.88 (d,  $J = 8.8$  Hz, 2H), 6.78 (s, 1H), 5.21 (dd,  $J = 8.8, 5.1$  Hz, 1H), 4.31 (m, 2H), 4.18 (q,  $J = 7.1$  Hz, 2H), 3.96 (dd,  $J = 17.5, 8.8$  Hz, 1H), 3.84 (s, 3H), 3.80 (s, 3H), 3.36 (dd,  $J = 17.5, 5.2$  Hz, 1H), 1.34 (t,  $J = 7.1$  Hz, 3H), 1.20 (t,  $J = 7.1$  Hz, 3H).  $^{13}\text{C}$  NMR (100 MHz, Chloroform-*d*)  $\delta$  195.2, 170.5, 163.7, 163.4, 159.6, 155.8, 153.0, 130.5, 130.1, 129.6, 125.5, 122.8, 116.8, 114.3, 113.8, 104.2, 77.5, 61.6, 60.6, 55.5, 55.4, 40.2, 38.9, 14.4, 14.2. Exact mass calculated  $\text{C}_{27}\text{H}_{29}\text{O}_8^+ [\text{M}+\text{H}]^+$ : 481.1862; found: 481.1863.

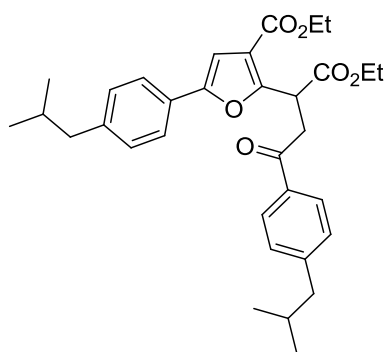

**Ethyl 2-(1-ethoxy-4-(4-isobutylphenyl)-1,4-dioxobutan-2-yl)-5-(4-isobutylphenyl)furan-3-carboxylate (4d):** According to the method C, allenolate **1** (40 mg, 217  $\mu\text{mol}$ ) and 2-iodo-1-(4-isobutylphenyl)ethanone (164 mg, 543  $\mu\text{mol}$ ) provided **4d** after flash column chromatography (10% ethyl acetate in petroleum ether) as a yellow liquid (65 mg, 57%).  $R_f = 0.63$  (10% ethyl acetate in petroleum ether). **IR** (neat):  $\nu_{\text{max}}/\text{cm}^{-1}$  2957, 2927, 2869, 1715, 1742.  $^1\text{H}$  NMR (400 MHz, Chloroform-*d*)  $\delta = 7.90$  (d,  $J = 8.2$  Hz, 2H), 7.50 (d,  $J = 8.2$  Hz, 2H), 7.22 (d,  $J = 8.3$  Hz, 2H), 7.13 (d,  $J = 8.2$  Hz, 2H), 6.88 (s, 1H), 5.24 (dd,  $J = 8.7, 5.2$  Hz, 1H), 4.37 – 4.27 (m,

2H), 4.18 (m, 2H), 4.00 (dd,  $J = 17.7, 8.7$  Hz, 1H), 3.40 (m,  $J = 17.6, 5.2$  Hz, 1H), 2.51 (d,  $J = 7.1$  Hz, 2H), 2.46 (d,  $J = 7.2$  Hz, 2H), 1.86 (m, 2H), 1.35 (t,  $J = 7.1$  Hz, 3H), 1.20 (t,  $J = 7.1$  Hz, 3H), 0.89 (d,  $J = 6.6$  Hz, 12H).  $^{13}\text{C}$  NMR (100 MHz, Chloroform-*d*)  $\delta$  196.4, 170.5, 163.4, 156.0, 153.2, 147.9, 142.0, 134.3, 129.6, 129.4, 128.2, 127.3, 123.8, 116.8, 105.1, 61.6, 60.7, 45.5, 45.3, 40.2, 39.1, 30.3, 30.2, 22.4, 14.4, 14.2. Exact mass calculated  $\text{C}_{33}\text{H}_{41}\text{O}_6^+ [\text{M}+\text{H}]^+$ : 533.2898; found: 533.2891.

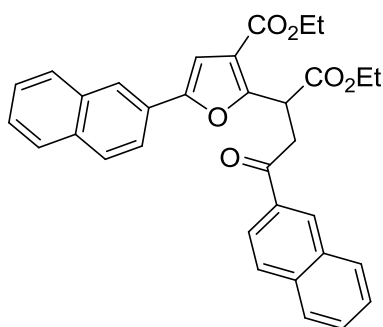

**Ethyl 2-(1-ethoxy-4-(naphthalen-2-yl)-1,4-dioxobutan-2-yl)-5-(naphthalen-2-yl)furan-3-carboxylate (4e):** According to the method C, allenolate **1** (40 mg, 217  $\mu\text{mol}$ ) and 2-iodo-1-(naphthalen-2-yl)ethanone (161 mg, 543  $\mu\text{mol}$ ) provided **4e** after flash column chromatography (10% ethyl acetate in petroleum ether) as a yellow liquid (84 mg, 74%).  $R_f = 0.36$  (10% ethyl acetate in petroleum ether). **IR** (neat):  $\nu_{\text{max}}/\text{cm}^{-1}$  2928, 2980, 1735, 1717.  $^1\text{H}$  NMR (400 MHz, Chloroform-*d*)  $\delta = 8.56$  (s, 1H), 8.09 – 8.03 (m, 2H), 7.95 (d,  $J = 7.9$  Hz, 1H), 7.91 – 7.85 (m, 2H), 7.83 – 7.72 (m, 3H), 7.69 (dd,  $J = 8.6, 1.6$  Hz,

1H), 7.62 – 7.51 (m, 3H), 7.46 – 7.43 (m, 1H), 7.08 (s, 1H), 5.38 (dd,  $J = 8.6, 5.4$  Hz, 1H), 4.37 (qq,  $J = 8.0, 3.6$  Hz, 2H), 4.29 – 4.18 (m, 3H), 3.64 (dd,  $J = 17.6, 5.3$  Hz, 1H), 1.39 (t,  $J = 7.2$  Hz, 3H), 1.25 (t,  $J = 7.1$  Hz, 3H).  $^{13}\text{C}$  NMR (100 MHz, Chloroform-*d*)  $\delta$  196.7, 170.5, 163.3, 156.6, 153.2, 135.8, 133.9, 133.4, 133.0, 132.6, 130.1, 129.7, 128.6, 128.3, 127.9, 127.9, 127.0, 126.9, 126.7, 126.4, 123.9, 122.6, 122.1, 117.2, 106.5, 77.5, 77.2, 76.8, 61.8, 60.8, 40.4, 39.3, 14.4, 14.2. Exact mass calculated  $\text{C}_{33}\text{H}_{29}\text{O}_6^+ [\text{M}+\text{H}]^+$ : 521.1964; found: 521.1967.

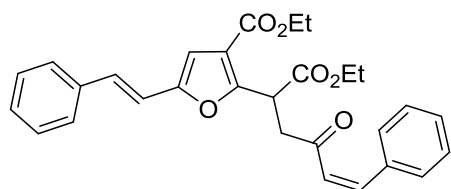

**Ethyl 2-(1-ethoxy-1,4-dioxo-6-phenylhex-5-en-2-yl)-5-styrylfuran-3-carboxylate (4f):** According to the method C, allenolate **1** (40 mg, 217  $\mu\text{mol}$ ) and 1-iodo-4-phenylbut-

3-en-2-one (148 mg, 543  $\mu\text{mol}$ ) provided **4f** after flash column chromatography (5% ethyl acetate in petroleum ether) as a yellow liquid (62 mg, 60%).  $R_f = 0.26$  (10% ethyl acetate in petroleum ether). **IR** (neat):  $\nu_{\text{max}}/\text{cm}^{-1}$  2981, 2960, 1739, 1715, 1231.  $^1\text{H}$  NMR (400 MHz, Chloroform-*d*)  $\delta$  7.62 (d,  $J = 16.2$  Hz, 1H), 7.54 (dd,  $J = 6.4, 2.8$  Hz, 2H), 7.42 – 7.37 (m, 5H), 7.32 (t,  $J = 7.5$  Hz, 2H), 7.27 – 7.23 (m, 1H), 6.99 (d,  $J = 16.3$  Hz, 1H), 6.78 (dd,  $J = 16.2, 1.9$  Hz, 2H), 6.62 (s, 1H), 5.16 (dd,  $J = 8.6, 5.4$  Hz, 1H), 4.32 (m, 2H), 4.19 (q,  $J = 7.1$  Hz, 2H), 3.69 (dd,  $J = 17.4, 8.7$  Hz, 1H), 3.15 (dd,  $J = 17.4, 5.4$  Hz, 1H), 1.35 (t,  $J = 7.1$  Hz, 3H), 1.22 (t,  $J = 7.2$  Hz, 3H).  $^{13}\text{C}$  NMR (100 MHz, Chloroform-*d*)  $\delta$  196.6, 170.4, 163.2, 156.4, 152.3, 152.3, 143.4, 136.5, 134.4, 130.7, 129.1, 128.8, 128.8, 128.5, 128.1, 126.5, 125.8, 116.8, 115.5, 109.0, 77.5, 77.1, 76.8, 61.7, 60.8, 40.8, 40.1, 14.4, 14.2. Exact mass calculated  $\text{C}_{29}\text{H}_{29}\text{O}_6^+$   $[\text{M}+\text{H}]^+$ : 473.1964; found: 473.1970.

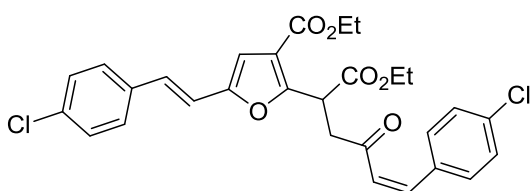

**Ethyl 2-(6-(4-chlorophenyl)-1-ethoxy-1,4-dioxohex-5-en-2-yl)-5-(4-chlorostyryl)furan-3-carboxylate (4g)**: According to the method C, allenolate **1** (40 mg, 217  $\mu\text{mol}$ ) and 4-(4-chlorophenyl)-1-iodobut-3-en-2-one (167 mg, 543  $\mu\text{mol}$ ) provided **4g** after flash column chromatography (10% ethyl acetate in petroleum

ether) as a yellow liquid (29mg, 40%).  $R_f = 0.28$  (10% ethyl acetate in petroleum ether). **IR** (neat):  $\nu_{\text{max}}/\text{cm}^{-1}$  2982, 2927, 1714, 1215, 1177.  $^1\text{H}$  NMR (400 MHz, Chloroform-*d*)  $\delta$  7.55 (d,  $J = 16.2$  Hz, 1H), 7.46 (d,  $J = 8.5$  Hz, 2H), 7.35 (d,  $J = 8.6$  Hz, 3H), 7.30 (d,  $J = 9.5$  Hz, 3H), 6.92 (d,  $J = 16.3$  Hz, 1H), 6.74 (dd,  $J = 16.2, 2.1$  Hz, 2H), 6.63 (s, 1H), 5.14 (dd,  $J = 8.6, 5.4$  Hz, 1H), 4.31 (m, 2H), 4.18 (m, 2H), 3.67 (dd,  $J = 17.4, 8.6$  Hz, 1H), 3.11 (dd,  $J = 17.4, 5.5$  Hz, 1H), 1.35 (t,  $J = 7.1$  Hz, 3H), 1.21 (t,  $J = 7.1$  Hz, 3H).  $^{13}\text{C}$  NMR (100 MHz, Chloroform-*d*)  $\delta$  196.2, 170.2, 163.1, 156.5, 152.0, 141.9, 136.7, 135.0, 133.7, 132.9, 129.6, 129.4, 129.0, 127.7, 127.4, 126.1, 116.9, 116.0, 109.4, 61.8, 60.8, 41.0, 40.1, 14.4, 14.2. Exact mass calculated  $\text{C}_{29}\text{H}_{27}\text{Cl}_2\text{O}_6^+$   $[\text{M}+\text{H}]^+$ : 541.1185; found : 541.1184.

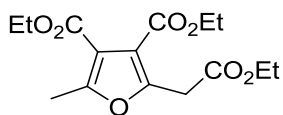

**Diethyl 2-(2-ethoxy-2-oxoethyl)-5-methylfuran-3,4-dicarboxylate (3h)**: According to the method A, allenolate **1** (40 mg, 217  $\mu\text{mol}$ ) and ethyl 2-bromo-3-oxobutanoate (90 mg, 434  $\mu\text{mol}$ ) provided **3h** after flash column chromatography (10% ethyl acetate in petroleum ether) as a colorless oil (43 mg, 63%). **IR** (neat):  $\nu_{\text{max}}/\text{cm}^{-1}$  2983, 2934, 1739, 1731.  $R_f = 0.25$  (10% ethyl acetate in petroleum ether).  $^1\text{H}$  NMR (400 MHz, Chloroform-*d*)  $\delta$  4.32 – 4.22 (m, 4H), 4.15 (q,  $J = 7.1$  Hz, 2H), 3.86 (s, 2H), 2.44 (s, 3H), 1.30 (td,  $J = 7.1, 5.9$  Hz, 6H), 1.24 (t,  $J = 7.1$  Hz, 3H).  $^{13}\text{C}$  NMR (100 MHz, Chloroform-*d*)  $\delta$  168.4, 163.4, 162.9, 156.8, 151.1, 116.0, 114.1, 61.5, 60.8, 33.6, 14.3, 14.2, 13.3. Exact mass calculated  $\text{C}_{15}\text{H}_{21}\text{O}_7^+$   $[\text{M}+\text{H}]^+$ : 313.1287; found : 313.1281.

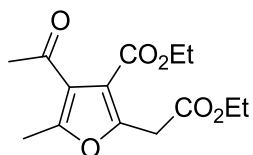

**Ethyl 4-acetyl-2-(2-ethoxy-2-oxoethyl)-5-methylfuran-3-carboxylate (3i)**: According to the method A, allenolate **1** (40 mg, 217  $\mu\text{mol}$ ) and 3-bromohexane-2,4-dione (78 mg, 434  $\mu\text{mol}$ ) provided **3i** after flash column chromatography (10% ethyl acetate in petroleum ether) as a colorless oil

(40mg, 65%).  $R_f = 0.26$  (10% ethyl acetate in petroleum ether). **IR** (neat):  $\nu_{\max}/\text{cm}^{-1}$  2963, 2926, 1743, 1715, 1260.  $^1\text{H NMR}$  (400 MHz, Chloroform-*d*)  $\delta = 4.27$  (q,  $J = 6.8$  Hz, 2H), 4.15 (q,  $J = 6.8$  Hz, 2H), 3.90 (s, 2H), 2.42 (s, 3H), 2.35 (s, 3H), 1.30 (t,  $J = 6.9$  Hz, 3H), 1.26 – 1.21 (m, 3H).  $^{13}\text{C NMR}$  (100 MHz, Chloroform-*d*)  $\delta$  196.8, 168.4, 163.0, 155.0, 152.3, 123.0, 114.9, 61.5, 61.0, 34.0, 31.1, 14.2, 13.2. Exact mass calculated  $\text{C}_{14}\text{H}_{19}\text{O}_6^+$   $[\text{M}+\text{H}]^+$ : 283.1182; found : 283.1183.

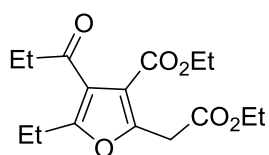

**Ethyl 2-(2-ethoxy-2-oxoethyl)-5-ethyl-4-propionylfuran-3-carboxylate (3j):** According to the method A, allenolate **1** (40 mg, 217  $\mu\text{mol}$ ) and 4-bromoheptane-3,5-dione (90 mg, 434  $\mu\text{mol}$ ) provided **3j** after flash column chromatography (10% ethyl acetate in petroleum ether) as a colorless oil (40mg, 65%).  $R_f = 0.44$  (10% ethyl acetate in petroleum ether). **IR** (neat):  $\nu_{\max}/\text{cm}^{-1}$  2980, 2938, 1744, 1717, 1275, 1182.  $^1\text{H NMR}$  (400 MHz, Chloroform-*d*)  $\delta$  4.24 (q,  $J = 7.1$  Hz, 2H), 4.15 (q,  $J = 7.1$  Hz, 2H), 3.92 (s, 2H), 2.73 (q,  $J = 7.3$  Hz, 2H), 2.66 (q,  $J = 7.6$  Hz, 2H), 1.28 (t,  $J = 7.2$  Hz, 3H), 1.23 (t,  $J = 7.1$  Hz, 3H), 1.17 (t,  $J = 7.5$  Hz, 3H), 1.10 (t,  $J = 7.3$  Hz, 3H).  $^{13}\text{C NMR}$  (100 MHz, Chloroform-*d*)  $\delta$  201.0, 168.5, 163.0, 158.1, 152.4, 122.0, 114.7, 77.5, 77.1, 76.8, 61.5, 61.0, 36.9, 34.0, 20.5, 14.2, 14.2, 12.7, 8.4. Exact mass calculated  $\text{C}_{16}\text{H}_{23}\text{O}_6^+$   $[\text{M}+\text{H}]^+$ : 311.1494; found : 311.1490.

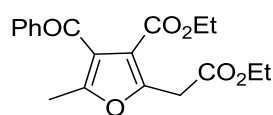

**Ethyl 4-benzoyl-2-(2-ethoxy-2-oxoethyl)-5-methylfuran-3-carboxylate (3k):** According to the method A, allenolate **1** (40 mg, 217  $\mu\text{mol}$ ) and 2-bromo-1-phenylbutane-1,3-dione (77 mg, 434  $\mu\text{mol}$ ) provided **3k** after flash column chromatography (5% ethyl acetate in petroleum ether) as a yellow liquid (54mg, 72%).  $R_f = 0.29$  (10% ethyl acetate in petroleum ether). **IR** (neat):  $\nu_{\max}/\text{cm}^{-1}$  2926, 2982, 1731, 1651, 1276, 1175.  $^1\text{H NMR}$  (400 MHz, Chloroform-*d*)  $\delta$  7.74 (d,  $J = 7.0$  Hz, 2H), 7.57 (t,  $J = 7.4$  Hz, 1H), 7.45 (t,  $J = 7.6$  Hz, 2H), 4.36 (q,  $J = 7.1$  Hz, 2H), 4.03 (dd,  $J = 14.1, 6.8$  Hz, 4H), 2.21 – 2.17 (m, 3H), 1.36 (t,  $J = 7.1$  Hz, 3H), 1.14 (t,  $J = 7.1$  Hz, 3H).  $^{13}\text{C NMR}$  (100 MHz, Chloroform-*d*)  $\delta$  192.0, 170.2, 158.9, 158.6, 140.3, 138.6, 133.2, 129.2, 128.8, 128.0, 123.9, 61.2, 61.0, 30.2, 14.8, 14.4, 14.2. Exact mass calculated  $\text{C}_{19}\text{H}_{20}\text{NaO}_6^+$   $[\text{M}+\text{H}]^+$ : 367.1158; found : 367.1163.

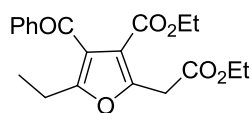

**Ethyl 4-benzoyl-2-(2-ethoxy-2-oxoethyl)-5-ethylfuran-3-carboxylate (3l):** According to the method A, allenolate **1** (40 mg, 217  $\mu\text{mol}$ ) and 2-bromo-1-phenylpentane-1,3-dione (77 mg, 406  $\mu\text{mol}$ ) provided **3l** after flash column chromatography (5% ethyl acetate in petroleum ether) as a yellow liquid (35 mg, 60%).  $R_f = 0.31$  (10% ethyl acetate in petroleum ether). **IR** (neat):  $\nu_{\max}/\text{cm}^{-1}$  2923, 2851, 1735, 1269, 1174.  $^1\text{H NMR}$  (400 MHz, Chloroform-*d*)  $\delta$  7.76 (d,  $J = 7.9$  Hz, 2H), 7.57 (t,  $J = 7.4$  Hz, 1H), 7.45 (t,  $J = 7.6$  Hz, 2H), 4.36 (q,  $J = 7.1$  Hz, 2H), 4.06 – 3.97 (m, 4H), 2.51 (q,  $J = 7.5$  Hz, 2H), 1.36 (t,  $J = 7.1$  Hz, 3H), 1.14 (q,  $J = 7.4$  Hz, 6H). Exact mass calculated  $\text{C}_{20}\text{H}_{22}\text{NaO}_6^+$   $[\text{M}+\text{Na}]^+$ : 381.1314; found : 381.1310.



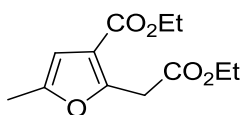**Ethyl 2-(2-ethoxy-2-oxoethyl)-5-methylfuran-3-carboxylate (3m):**

According to the method B, allenolate **1** (40 mg, 217  $\mu\text{mol}$ ) and 1-bromopropan-2-one (60 mg, 434  $\mu\text{mol}$ ) provided **3m** after flash column chromatography (10% ethyl acetate in petroleum ether) as a colorless oil (36 mg, 68%).  $R_f = 0.54$  (10% ethyl acetate in petroleum ether). **IR** (neat):  $\nu_{\text{max}}/\text{cm}^{-1}$  2983, 2930, 1746, 1714, 1238.  $^1\text{H}$  NMR (400 MHz, Chloroform-*d*)  $\delta = 6.26$  (s, 1H), 4.23 (q,  $J = 7.2$  Hz, 2H), 4.15 (q,  $J = 7.1$  Hz, 2H), 3.97 (s, 2H), 2.24 (s, 3H), 1.29 (t,  $J = 7.1$  Hz, 3H), 1.23 (t,  $J = 7.1$  Hz, 3H).  $^{13}\text{C}$  NMR (100 MHz, Chloroform-*d*)  $\delta$  169.0, 163.7, 152.5, 151.5, 116.4, 106.6, 61.3, 60.3, 33.9, 14.3, 14.2, 13.4. Exact mass calculated  $\text{C}_{12}\text{H}_{16}\text{NaO}_5^+$   $[\text{M}+\text{Na}]^+$ : 263.0895; found : 263.0899.

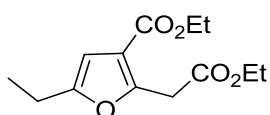**Ethyl 2-(2-ethoxy-2-oxoethyl)-5-ethylfuran-3-carboxylate (3n):**

According to the method B, allenolate **1** (40 mg, 217  $\mu\text{mol}$ ) and 1-bromobutan-2-one (66 mg, 434  $\mu\text{mol}$ ) provided **3n** after flash column chromatography (10% ethyl acetate in petroleum ether) as a colorless oil (29mg, 52%).  $R_f = 0.47$  (10% ethyl acetate in petroleum ether). **IR** (neat):  $\nu_{\text{max}}/\text{cm}^{-1}$  2980, 2936, 2856, 1746, 1714.  $^1\text{H}$  NMR (400 MHz, Chloroform-*d*)  $\delta$  6.27 (s, 1H), 4.24 (q,  $J = 7.1$  Hz, 2H), 4.16 (q,  $J = 7.1$  Hz, 2H), 3.99 (s, 2H), 2.60 (m, 2H), 1.30 (t,  $J = 7.1$  Hz, 3H), 1.22 (dt,  $J = 15.1, 7.3$  Hz, 6H).  $^{13}\text{C}$  NMR (100 MHz, Chloroform-*d*)  $\delta$  169.1, 163.9, 157.2, 152.4, 116.1, 105.0, 61.3, 60.3, 33.9, 21.2, 14.4, 14.2, 11.8. Exact mass calculated  $\text{C}_{13}\text{H}_{18}\text{NaO}_5^+$   $[\text{M}+\text{Na}]^+$ : 277.1051; found : 277.1054.

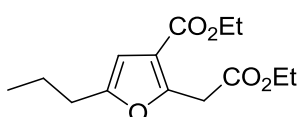**Ethyl 2-(2-ethoxy-2-oxoethyl)-5-propylfuran-3-carboxylate:**

According to the method B, allenolate **1** (40 mg, 217.17  $\mu\text{mol}$ ) and 1-bromopentan-2-one (72 mg, 434.33  $\mu\text{mol}$ ) at r.t. provided **14** after flash column chromatography (5% ethyl acetate in petroleum ether) as a yellow liquid (21 mg, 35%).  $R_f = 0.6$  (10% ethyl acetate in petroleum ether).  $^1\text{H}$  NMR (400 MHz, Chloroform-*d*)  $\delta$  6.27 (s, 1H), 4.24 (q,  $J = 7.1$  Hz, 2H), 4.15 (q,  $J = 7.1$  Hz, 2H), 3.98 (s, 2H), 2.54 (t,  $J = 7.4$  Hz, 2H), 1.63 (t,  $J = 7.4$  Hz, 2H), 1.30 (t,  $J = 7.1$  Hz, 3H), 1.23 (t,  $J = 7.1$  Hz, 3H), 0.93 (t,  $J = 7.4$  Hz, 3H).  $^{13}\text{C}$  NMR (100 MHz, Chloroform-*d*)  $\delta$  169.0, 163.8, 155.8, 152.4, 116.1, 105.9, 61.3, 60.3, 33.9, 29.7, 21.1, 14.4, 14.2, 13.7. Exact mass calculated  $\text{C}_{14}\text{H}_{20}\text{NaO}_5^+$   $[\text{M}+\text{Na}]^+$ : 291.1208; found : 291.1205.

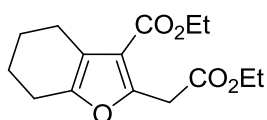**Ethyl 2-(2-ethoxy-2-oxoethyl)-4,5,6,7-tetrahydrobenzo**

**furan-3-carboxylate (3q):** Allenolate **1** (40 mg, 217  $\mu\text{mol}$ ), 2-bromocyclohexanone (77 mg, 434  $\mu\text{mol}$ ), 18-Crown-6 (57 mg, 217  $\mu\text{mol}$ ),  $\text{Ag}_2\text{CO}_3$  (60 mg, 217  $\mu\text{mol}$ ) were added in vial. 2 ml toluene was added followed by the addition of  $\text{K}_2\text{CO}_3$  (300 mg, 2 mmol). The reaction mixture was stirred in a close vial for 24 hrs. After completion of the reaction (as monitored by TLC analysis), the reaction mixture was poured in separating funnel and extracted with EtOAc and brine. The combined organic layer was collected and dried over  $\text{Na}_2\text{SO}_4$  and concentrated under reduced pressure. The residue was purified by column chromatography (10% ethyl acetate in petroleum ether) on silica gel to afford **3o** as a colorless

oil (22mg, 36%).  $R_f = 0.52$  (10% ethyl acetate in petroleum ether). **IR** (neat):  $\nu_{\max}/\text{cm}^{-1}$  2937, 2855, 1745, 1714, 1272.  $^1\text{H NMR}$  (400 MHz, Chloroform-*d*)  $\delta$  4.23 (q,  $J = 7.1$  Hz, 2H), 4.16 (q,  $J = 7.1$  Hz, 2H), 3.98 (s, 2H), 2.59 (t,  $J = 6.0$  Hz, 2H), 2.53 (t,  $J = 6.1$  Hz, 2H), 1.78 (qd,  $J = 7.7$ , 6.2, 3.9 Hz, 2H), 1.74 – 1.66 (m, 2H), 1.30 (t,  $J = 7.1$  Hz, 3H), 1.25 (t,  $J = 7.1$  Hz, 3H).  $^{13}\text{C NMR}$  (100 MHz, Chloroform-*d*)  $\delta$  169.3, 164.4, 152.4, 150.8, 117.8, 115.1, 77.4, 77.1, 76.8, 61.3, 60.0, 34.2, 23.0, 22.8, 22.7, 22.2, 14.3, 14.2. Exact mass calculated  $\text{C}_{15}\text{H}_{20}\text{NaO}_5^+$   $[\text{M}+\text{Na}]^+$ : 303.1208; found : 303.1200.

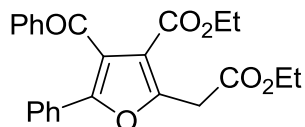

**Ethyl 4-benzoyl-2-(2-ethoxy-2-oxoethyl)-5-phenylfuran-3-carboxylate (3r):** According to the method B, allenolate **1** (40 mg, 217  $\mu\text{mol}$ ) and 2-bromo-1,3-diphenylpropane-1,3-dione (132 mg, 434  $\mu\text{mol}$ ) provided **3p** after flash column chromatography (10% ethyl acetate in petroleum ether) as a yellow liquid (76 mg, 86%).  $R_f = 0.42$  (10% ethyl acetate in petroleum ether). **IR** (neat):  $\nu_{\max}/\text{cm}^{-1}$  2962, 2928, 1736, 1708, 1176.  $^1\text{H NMR}$  (400 MHz, Chloroform-*d*)  $\delta$  7.75 (d,  $J = 7.4$  Hz, 2H), 7.41 (t,  $J = 8.1$  Hz, 4H), 7.26 (d,  $J = 7.7$  Hz, 2H), 7.18 (q,  $J = 8.3$ , 6.6 Hz, 2H), 4.40 (q,  $J = 7.1$  Hz, 2H), 4.05 – 3.96 (m, 4H), 1.39 (t,  $J = 7.1$  Hz, 3H), 1.10 (t,  $J = 7.1$  Hz, 3H).  $^{13}\text{C NMR}$  (100 MHz, Chloroform-*d*)  $\delta$  192.2, 170.0, 159.0, 156.2, 140.9, 137.1, 133.5, 129.9, 129.8, 128.8, 128.5, 128.4, 128.1, 122.9, 61.3, 61.1, 30.2, 14.4, 14.1. Exact mass calculated  $\text{C}_{24}\text{H}_{23}\text{O}_6^+$   $[\text{M}+\text{H}]^+$ : 407.1495; found : 407.1499.

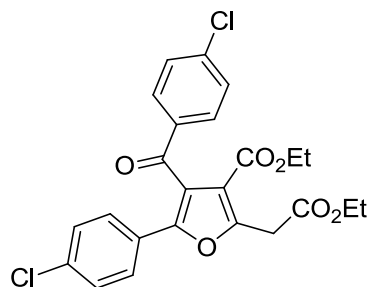

**Ethyl 4-(4-chlorobenzoyl)-5-(4-chlorophenyl)-2-(2-ethoxy-2-oxoethyl)furan-3-carboxylate (3s):** According to the method B, allenolate **1** (40 mg, 217  $\mu\text{mol}$ ) and 2-bromo-1,3-bis(4-chlorophenyl)propane-1,3-dione (162 mg, 434  $\mu\text{mol}$ ) provided **3q** after flash column chromatography (10% ethyl acetate in petroleum ether) as a yellow liquid (82 mg, 80%).  $R_f = 0.38$  (10% ethyl acetate in petroleum ether). **IR** (neat):  $\nu_{\max}/\text{cm}^{-1}$  2981, 2929, 1732, 1250, 1177.  $^1\text{H NMR}$  (400 MHz, Chloroform-*d*)  $\delta$  7.71 (d,  $J = 8.7$  Hz, 2H), 7.37 (d,  $J = 8.7$  Hz, 2H), 7.28 (d,  $J = 8.7$  Hz, 2H), 7.20 (d,  $J = 8.8$  Hz, 2H), 4.40 (q,  $J = 7.1$  Hz, 2H), 4.01 (t,  $J = 3.6$  Hz, 4H), 1.39 (t,  $J = 7.1$  Hz, 3H), 1.12 (t,  $J = 7.1$  Hz, 3H).  $^{13}\text{C NMR}$  (100 MHz, Chloroform-*d*)  $\delta$  190.7, 169.9, 158.8, 154.6, 141.1, 140.3, 136.2, 135.3, 131.2, 129.1, 129.1, 129.0, 128.7, 126.8, 122.9, 61.5, 61.2, 30.0, 14.4, 14.1. Exact mass calculated  $\text{C}_{24}\text{H}_{21}\text{Cl}_2\text{O}_6^+$   $[\text{M}+\text{H}]^+$ : 475.0715; found: 475.0712.

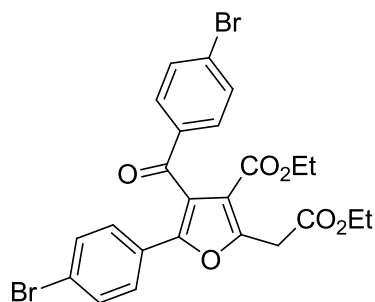

**Ethyl 4-(4-bromobenzoyl)-5-(4-bromophenyl)-2-(2-ethoxy-2-oxoethyl)furan-3-carboxylate (3t):** According to the method B, allenolate **1** (40 mg, 217  $\mu\text{mol}$ ) and 2-bromo-1,3-bis(4-bromophenyl)propane-1,3-dione (200 mg, 434  $\mu\text{mol}$ ) provided **3r** after flash column chromatography (10% ethyl acetate in petroleum ether) as a yellow liquid (75 mg, 61%).  $R_f = 0.43$  (10% ethyl acetate in petroleum ether). **IR** (neat):  $\nu_{\max}/\text{cm}^{-1}$  2963, 2927, 1732, 1260, 1177.  $^1\text{H NMR}$  (400 MHz, Chloroform-*d*)  $\delta =$

7.63 (d,  $J = 8.2$  Hz, 2H), 7.45 (d,  $J = 8.5$  Hz, 2H), 7.36 (d,  $J = 8.3$  Hz, 2H), 7.30 (d,  $J = 8.6$  Hz, 2H), 4.40 (q,  $J = 7.1$  Hz, 2H), 4.05 – 3.95 (m, 4H), 1.39 (t,  $J = 7.1$ , 3H), 1.11 (t,  $J = 7.1$ , 3H).  $^{13}\text{C}$  NMR (100 MHz, Chloroform- $d$ )  $\delta$  1900.9, 169.9, 158.8, 154.6, 141.2, 135.7, 132.1, 131.9, 131.3, 129.3, 129.2, 128.7, 127.2, 124.6, 122.9, 61.5, 61.3, 30.0, 14.4, 14.1. Exact mass calculated  $\text{C}_{24}\text{H}_{21}\text{Br}_2\text{O}_6^+$   $[\text{M}+\text{H}]^+$ : 562.9705; found : 562.9709.

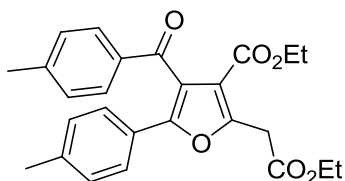

**Ethyl 2-(2-ethoxy-2-oxoethyl)-4-(4-methylbenzoyl)-5-p-tolylfuran-3-carboxylate (3u):** allenolate **1** (40 mg, 217  $\mu\text{mol}$ ), 2-bromo-1-(4-chlorophenyl)-3-phenylpropane-1,3-dione (72 mg, 217  $\mu\text{mol}$ ), and TBAB (70 mg, 217  $\mu\text{mol}$ ) were added in vial. 2 ml toluene was added followed by the addition of  $\text{K}_2\text{CO}_3$  (300 mg, 2 mmol). The reaction mixture was stirred in a closed vial

for 24 h. After completion of the reaction (as monitored by TLC analysis), the reaction mixture was poured in a separating funnel and extracted with EtOAc and brine. The combined organic layers were collected and dried over  $\text{Na}_2\text{SO}_4$  and concentrated under reduced pressure. The residue was purified by column chromatography (10% ethyl acetate in petroleum ether) on silica gel to afford **3t** as a yellow liquid (46mg, 48%).  $R_f = 0.33$  (10% ethyl acetate in petroleum ether). **IR** (neat):  $\nu_{\text{max}}/\text{cm}^{-1}$  2981, 2927, 1737, 1710.  $^1\text{H}$  NMR (400 MHz, Chloroform- $d$ )  $\delta$  7.69 (d,  $J = 8.2$  Hz, 2H), 7.36 (d,  $J = 8.2$  Hz, 2H), 7.08 (d,  $J = 8.0$  Hz, 2H), 7.00 (d,  $J = 8.0$  Hz, 2H), 4.39 (q,  $J = 7.1$  Hz, 2H), 3.99 (dd,  $J = 13.9, 6.8$  Hz, 4H), 2.31 (s, 3H), 2.25 (s, 3H), 1.38 (t,  $J = 7.1$  Hz, 3H), 1.09 (t,  $J = 7.1$  Hz, 3H).  $^{13}\text{C}$  NMR (100 MHz, Chloroform- $d$ )  $\delta$  191.9, 169.9, 159.1, 155.8, 144.5, 140.5, 139.9, 134.7, 130.1, 129.3, 129.2, 128.7, 127.8, 125.9, 122.6, 100.0, 61.2, 61.0, 30.3, 21.8, 21.4, 14.4, 14.1. Exact mass calculated  $\text{C}_{26}\text{H}_{26}\text{NaO}_6^+$   $[\text{M}+\text{H}]^+$ : 457.1627; found : 457.1627.

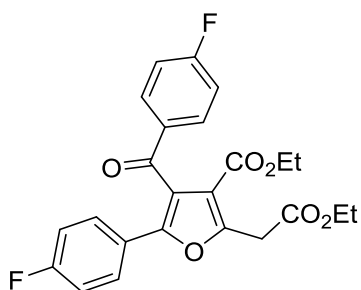

**Ethyl 2-(2-ethoxy-2-oxoethyl)-4-(4-fluorobenzoyl)-5-(4-fluorophenyl)furan-3-carboxylate (3v):** According to the method B, allenolate **1** (40 mg, 217  $\mu\text{mol}$ ) and 2-bromo-1,3-bis(4-fluorophenyl)propane-1,3-dione (147 mg, 434  $\mu\text{mol}$ ) provided **3t** after flash column chromatography (10% ethyl acetate in petroleum ether) as a yellow liquid (60 mg, 62%).  $R_f = 0.36$  (10% ethyl acetate in petroleum ether). **IR** (neat):  $\nu_{\text{max}}/\text{cm}^{-1}$  2925, 2981, 2851, 1734, 12327, 1178.  $^1\text{H}$  NMR (400 MHz, Chloroform- $d$ )  $\delta$  7.78 (dd,  $J = 8.9, 5.4$  Hz, 2H), 7.41 (dd,  $J = 8.9, 5.2$  Hz, 2H), 6.93 (dt,  $J = 17.5, 8.6$  Hz, 4H), 4.40 (q,  $J = 7.1$  Hz, 2H), 4.04 – 3.97 (m, 4H), 1.39 (t,  $J = 7.1$  Hz, 3H), 1.11 (t,  $J = 7.1$  Hz, 3H).  $^{13}\text{C}$  NMR (100 MHz, Chloroform- $d$ )  $\delta$  190.41, 169.94, 167.27, 163.47 (d,  $J = 251.7$  Hz), 158.88, 155.07, 140.98, 133.42 (d,  $J = 3.1$  Hz), 132.53 (d,  $J = 9.6$  Hz), 130.11 (d,  $J = 8.7$  Hz), 128.70, 124.75 (d,  $J = 3.6$  Hz), 122.61, 115.84 (d,  $J = 22.3$  Hz), 61.38, 61.18, 30.04, 14.39, 14.11. Exact mass calculated  $\text{C}_{24}\text{H}_{20}\text{F}_2\text{NaO}_6^+$   $[\text{M}+\text{Na}]^+$ : 465.1126; found : 465.1120.

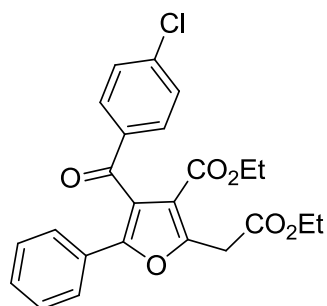

**Ethyl 4-(4-chlorobenzoyl)-2-(2-ethoxy-2-oxoethyl)-5-phenylfuran-3-carboxylate (3w):** According to the method B, allenolate **1** (40 mg, 217  $\mu\text{mol}$ ) and 2-bromo-1-(4-chlorophenyl)-3-phenylpropane-1,3-dione (77 mg, 406  $\mu\text{mol}$ ) provided **3u** after flash column chromatography (5% ethyl acetate in petroleum ether) as a yellow liquid (46 mg, 48%).  $R_f = 0.38$  (10% ethyl acetate in petroleum ether). **IR** (neat):  $\nu_{\text{max}}/\text{cm}^{-1}$  2928, 2960, 2852, 1733, 1250, 1180.  $^1\text{H}$  NMR (400 MHz, Chloroform-*d*)  $\delta$  7.69 (d,  $J = 8.5$  Hz, 2H), 7.40 (d,  $J = 7.1$  Hz, 2H), 7.26 – 7.18 (m, 5H), 4.40 (q,  $J = 7.1$  Hz, 2H), 4.07 – 3.97 (m, 4H), 1.39 (t,  $J = 7.1$  Hz, 4H), 1.12 (t,  $J = 7.1$  Hz, 4H).  $^{13}\text{C}$

NMR (100 MHz, Chloroform-*d*)  $\delta$  192.0, 169.8, 158.9, 154.7, 141.0, 137.0, 135.9, 133.8, 129.8, 129.1, 128.8, 128.7, 128.7, 127.0, 123.3, 61.4, 61.2, 30.2, 14.4, 14.1. Exact mass calculated  $\text{C}_{24}\text{H}_{22}\text{ClO}_6^+[\text{M}+\text{H}]^+$ : 441.1105; found : 441.1104.

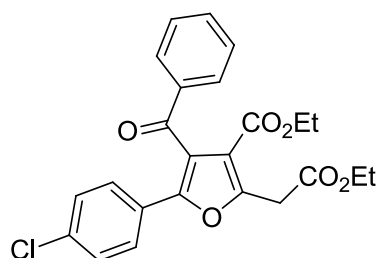

**Ethyl 4-benzoyl-5-(4-chlorophenyl)-2-(2-ethoxy-2-oxoethyl)furan-3-carboxylate (3x):** According to the method B, allenolate **1** (40 mg, 217  $\mu\text{mol}$ ) and 2-bromo-1-(4-chlorophenyl)-3-phenylpropane-1,3-dione (77 mg, 406  $\mu\text{mol}$ ) provided **3v** after flash column chromatography (5% ethyl acetate in petroleum ether) as a yellow liquid (34 mg, 36%).  $R_f = 0.41$  (10% ethyl acetate in petroleum ether). **IR** (neat):  $\nu_{\text{max}}/\text{cm}^{-1}$  2925, 2958, 2854, 1738, 1259, 1180.  $^1\text{H}$  NMR (400 MHz, Chloroform-*d*)  $\delta$

7.76 (d,  $J = 7.2$  Hz, 2H), 7.47 (t,  $J = 7.4$  Hz, 1H), 7.38 (d,  $J = 8.6$  Hz, 2H), 7.30 (t,  $J = 7.8$  Hz, 2H), 7.17 (d,  $J = 8.6$  Hz, 2H), 4.40 (q,  $J = 7.1$  Hz, 2H), 4.00 (d,  $J = 5.4$  Hz, 3H), 1.39 (t,  $J = 7.1$  Hz, 3H), 1.10 (t,  $J = 7.1$  Hz, 3H).  $^{13}\text{C}$  NMR (100 MHz, Chloroform-*d*)  $\delta$  191.0, 170.0, 159.0, 156.3, 141.0, 139.9, 135.4, 131.2, 130.0, 128.9, 128.8, 128.6, 128.3, 128.1, 122.6, 100.0, 61.4, 61.2, 30.0, 14.4, 14.1. Exact mass calculated  $\text{C}_{24}\text{H}_{22}\text{ClO}_6^+[\text{M}+\text{H}]^+$ : 441.1105; found : 441.1104.

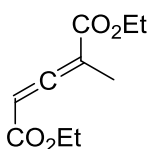

**Diethyl 2-methylpenta-2,3-dienedioate (13):** According to the method B, allenolate **1** (40 mg, 217  $\mu\text{mol}$ ) and methyl iodide (300 mg, 2 mmol) provided **13** after flash column chromatography (5% ethyl acetate in petroleum ether) as a colorless oil (15 mg, 35%).  $R_f = 0.38$  (10% ethyl acetate in petroleum ether).  $^1\text{H}$  NMR (400 MHz, Chloroform-*d*)  $\delta$  5.85 (q,  $J = 3.0$  Hz, 1H), 4.18 (q,  $J = 9.4, 7.1, 2.3$  Hz, 4H), 1.93 (d,  $J = 3.0$  Hz, 2H), 1.24 (td,  $J = 7.1, 5.6$  Hz, 6H).  $^{13}\text{C}$  NMR (100 MHz, Chloroform-*d*)  $\delta$  218.3, 165.6, 164.2, 100.3, 90.9, 61.6, 61.3, 14.3, 14.2, 14.2. The spectral data match as reported previously.<sup>3</sup>

S#345694

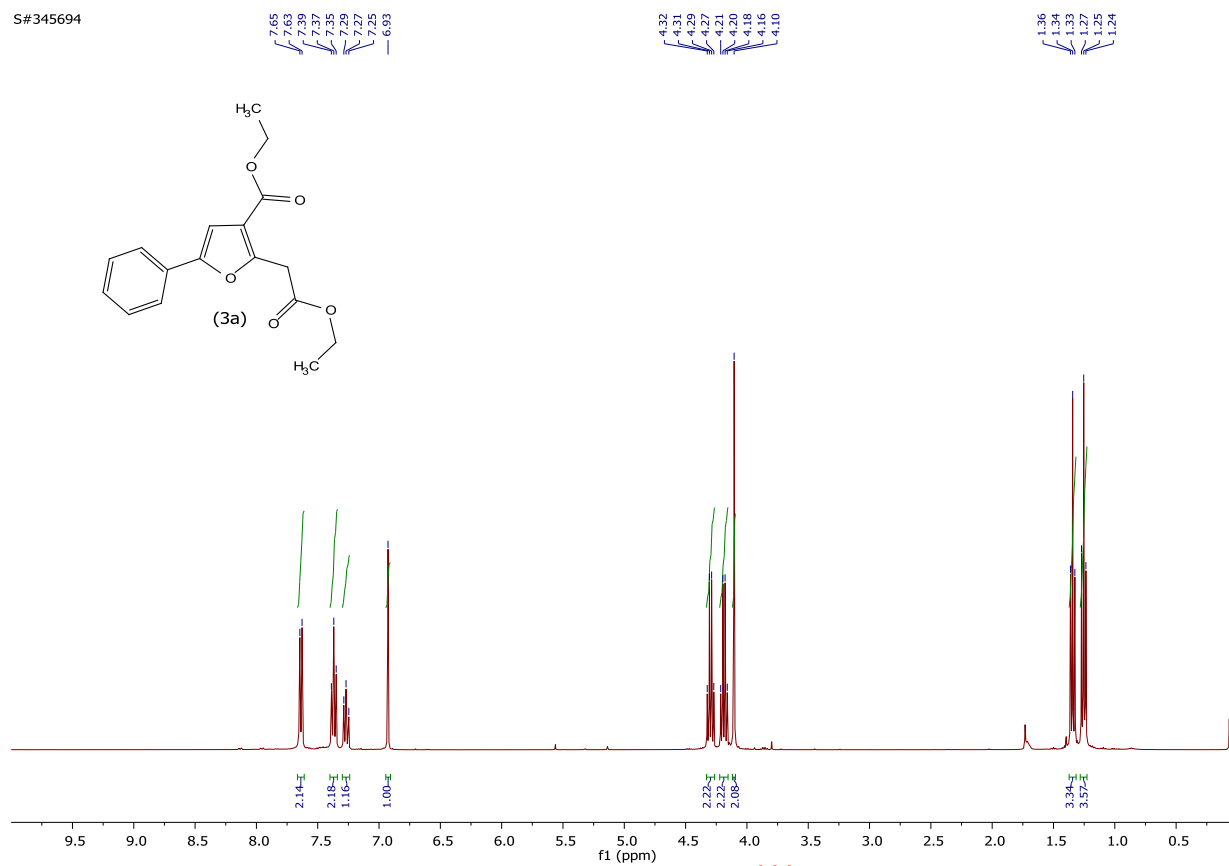

S#542961

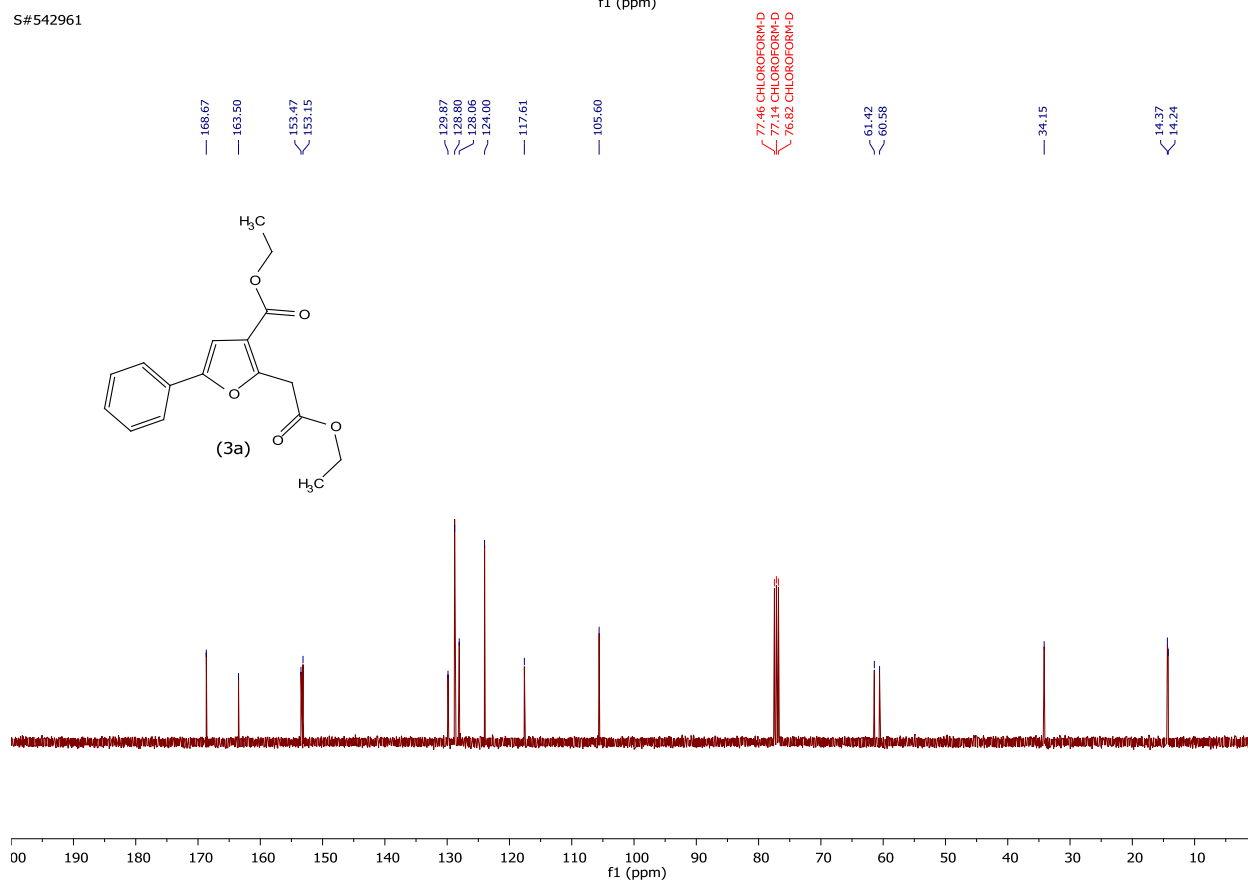

S#425776

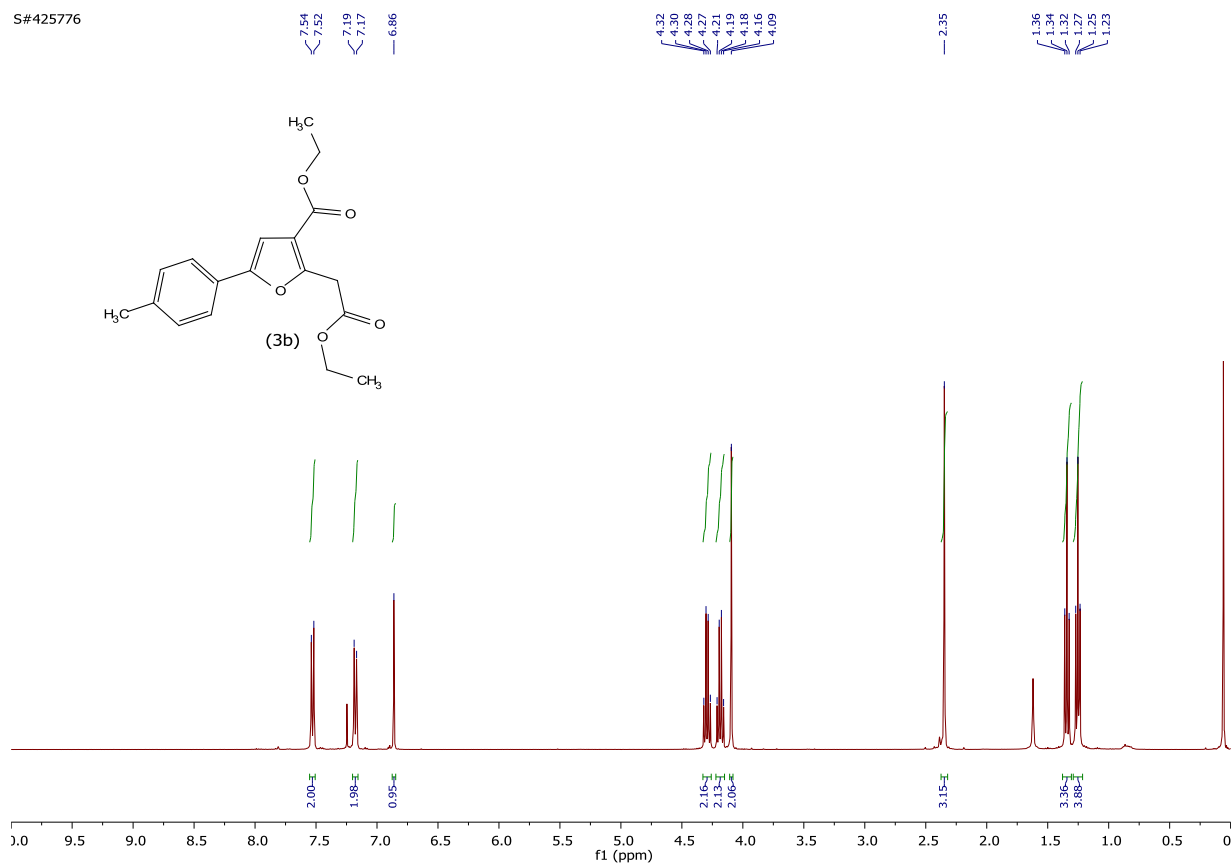

S#607389

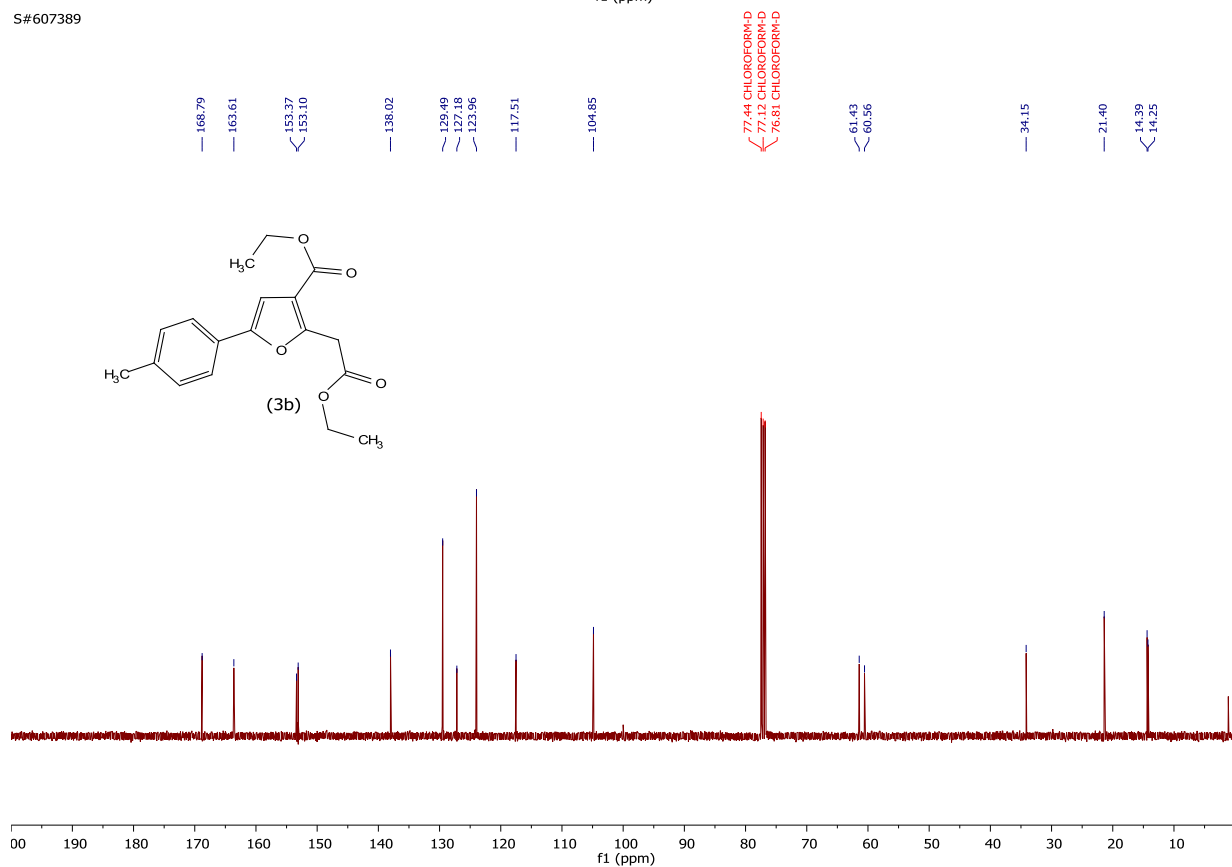

S#607517

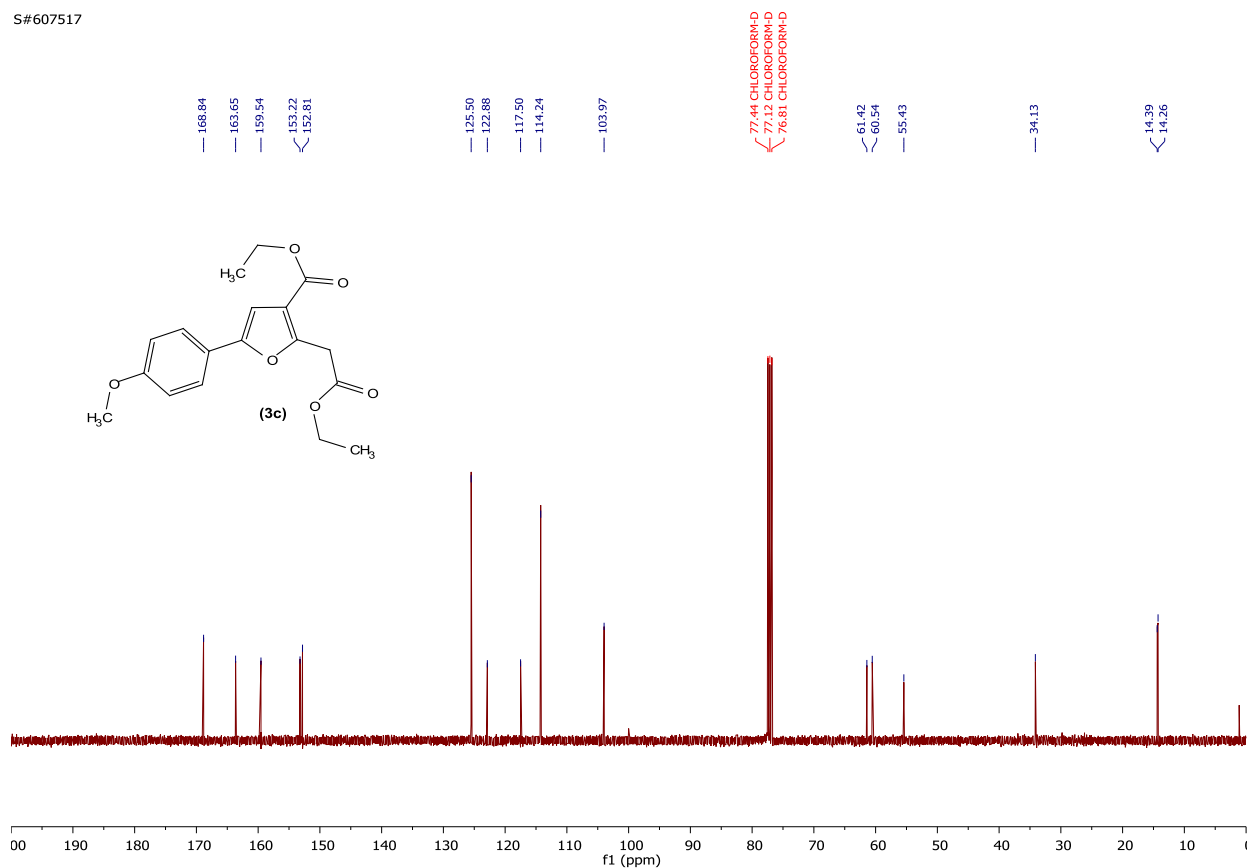

S#420465

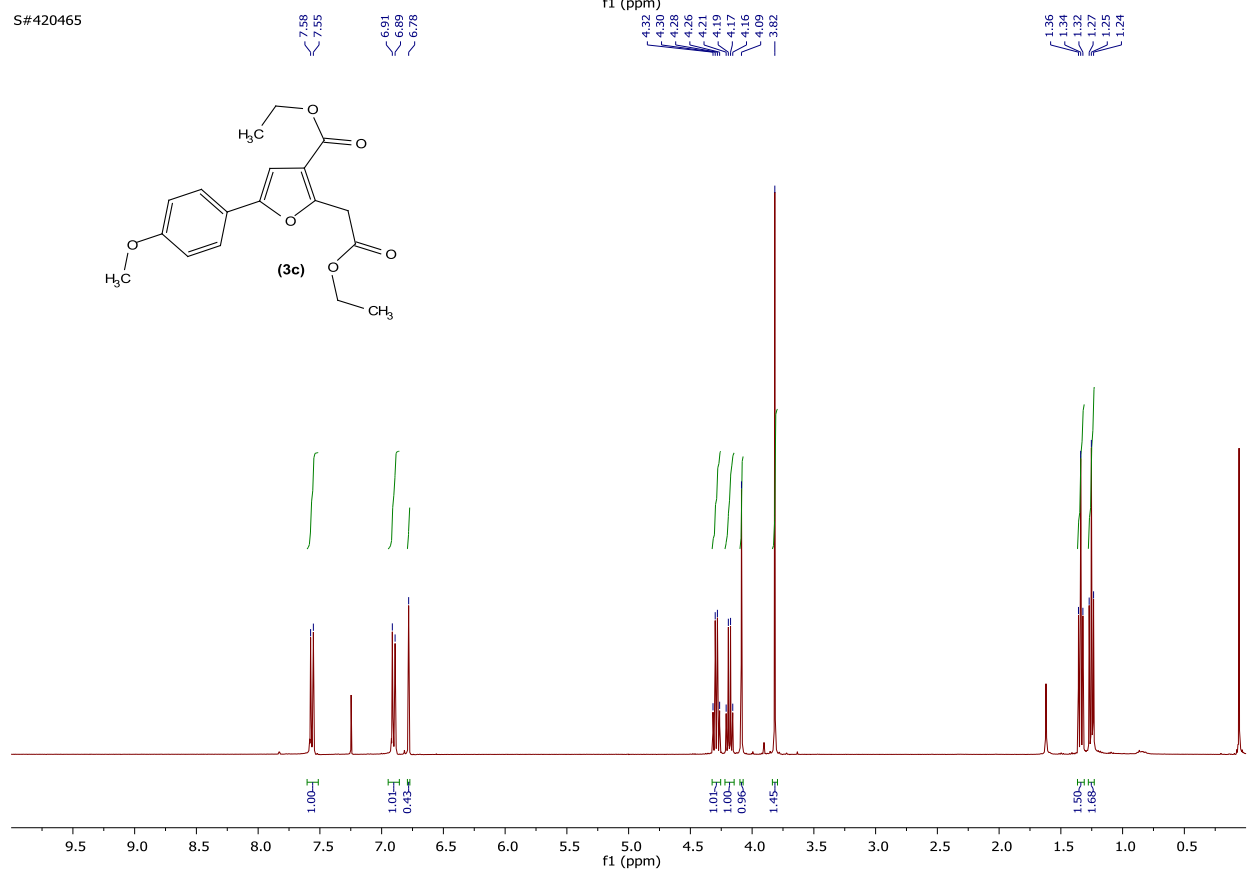

S#399679

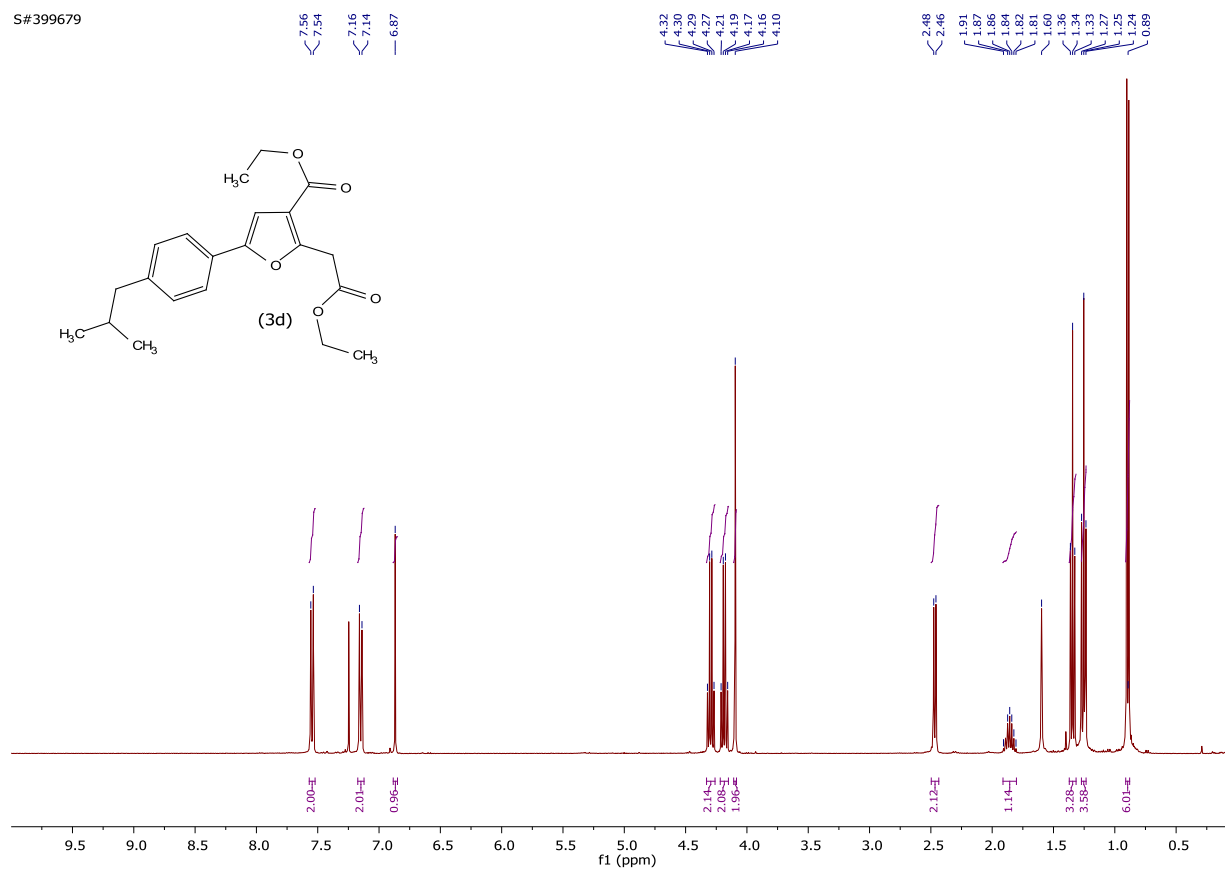

S#608034

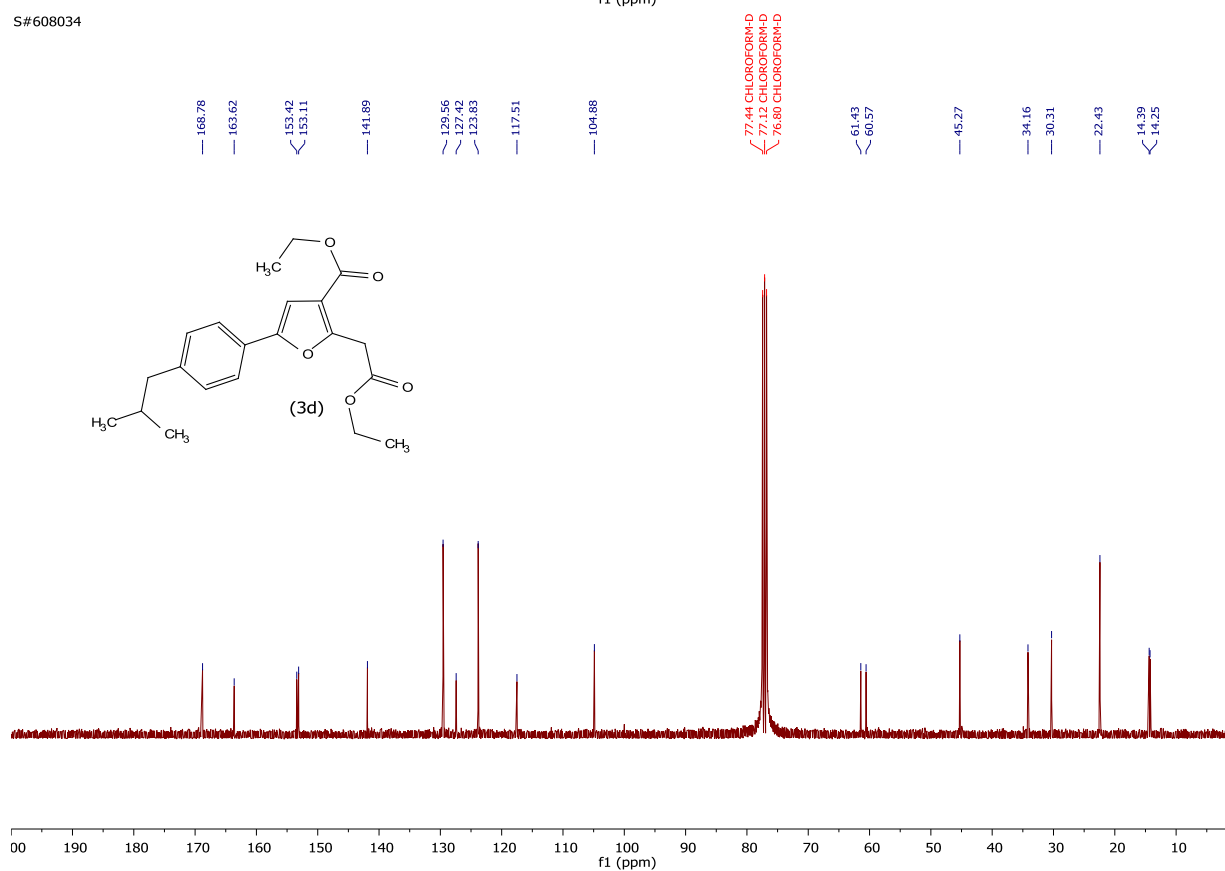



S#606420

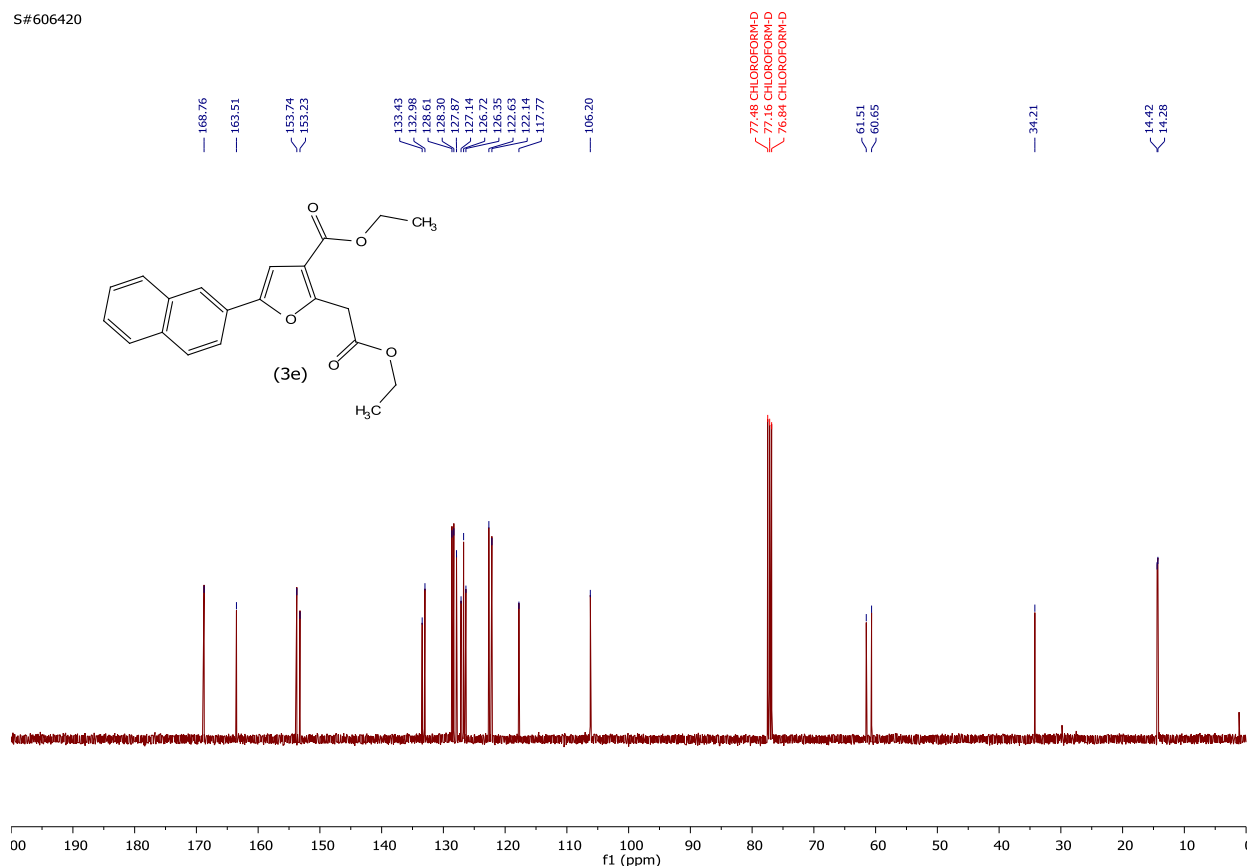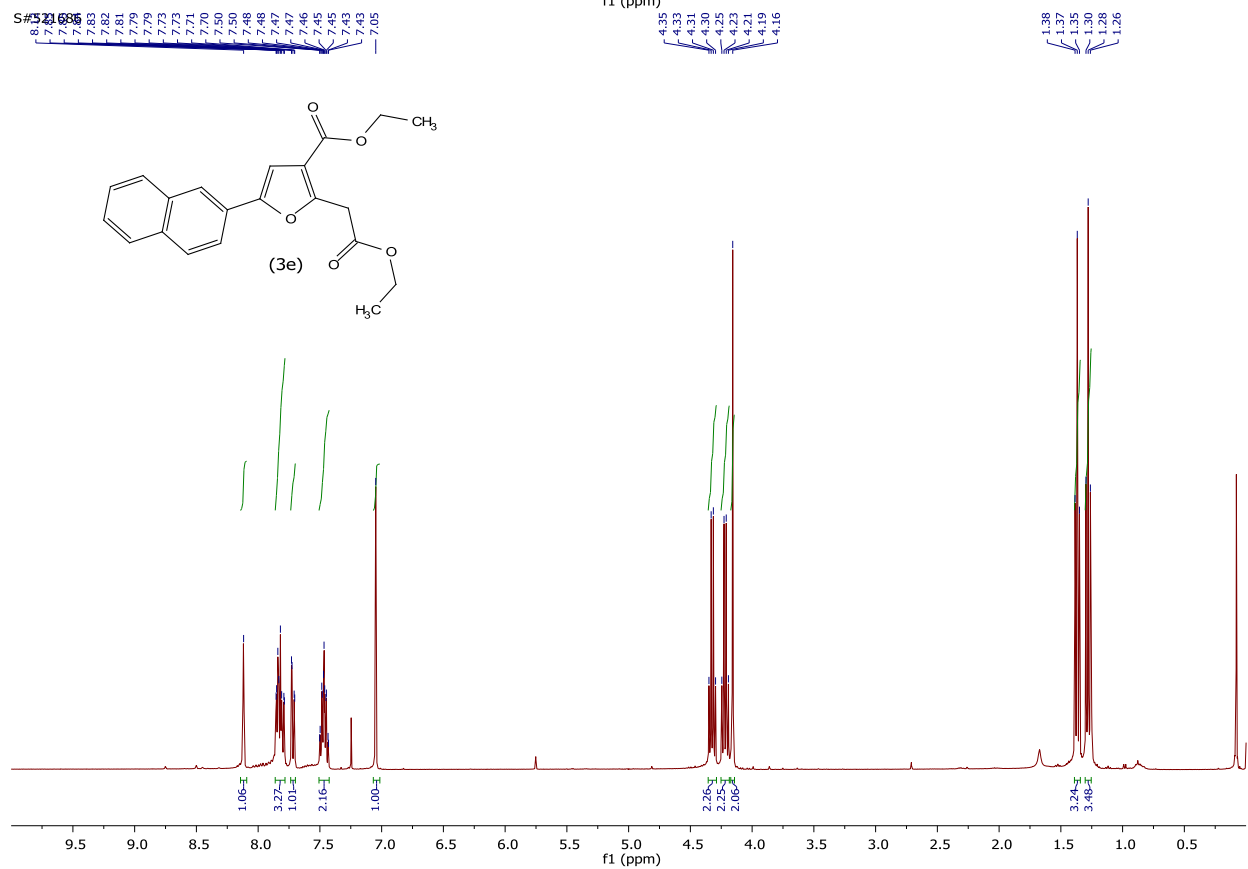

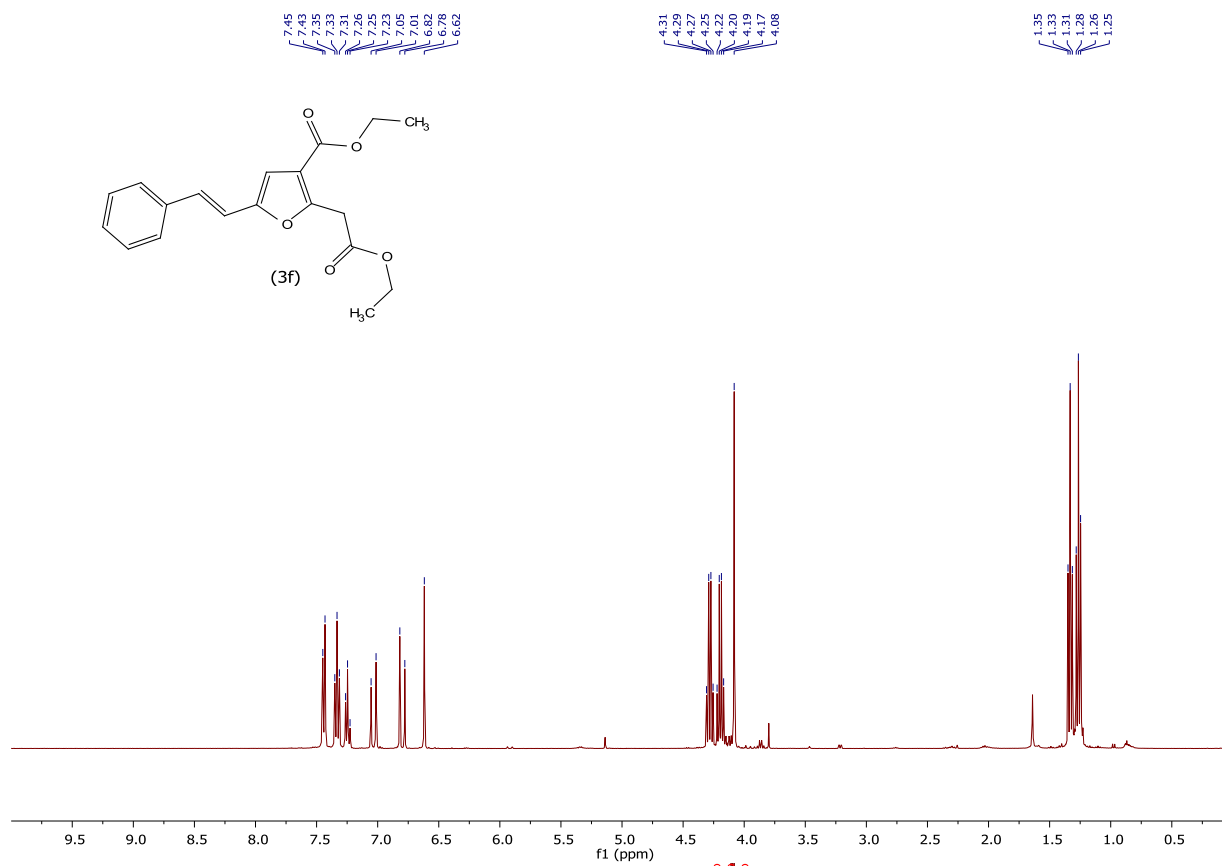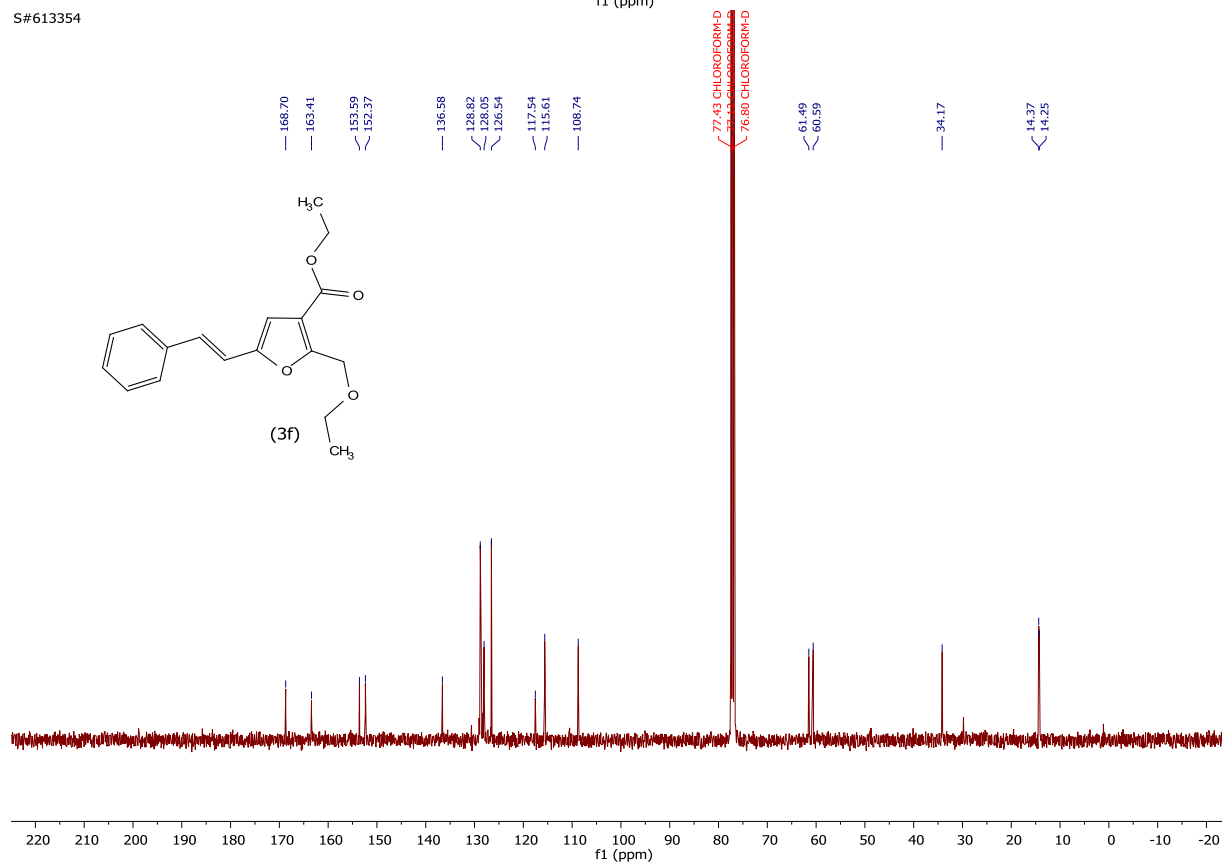

S#443542

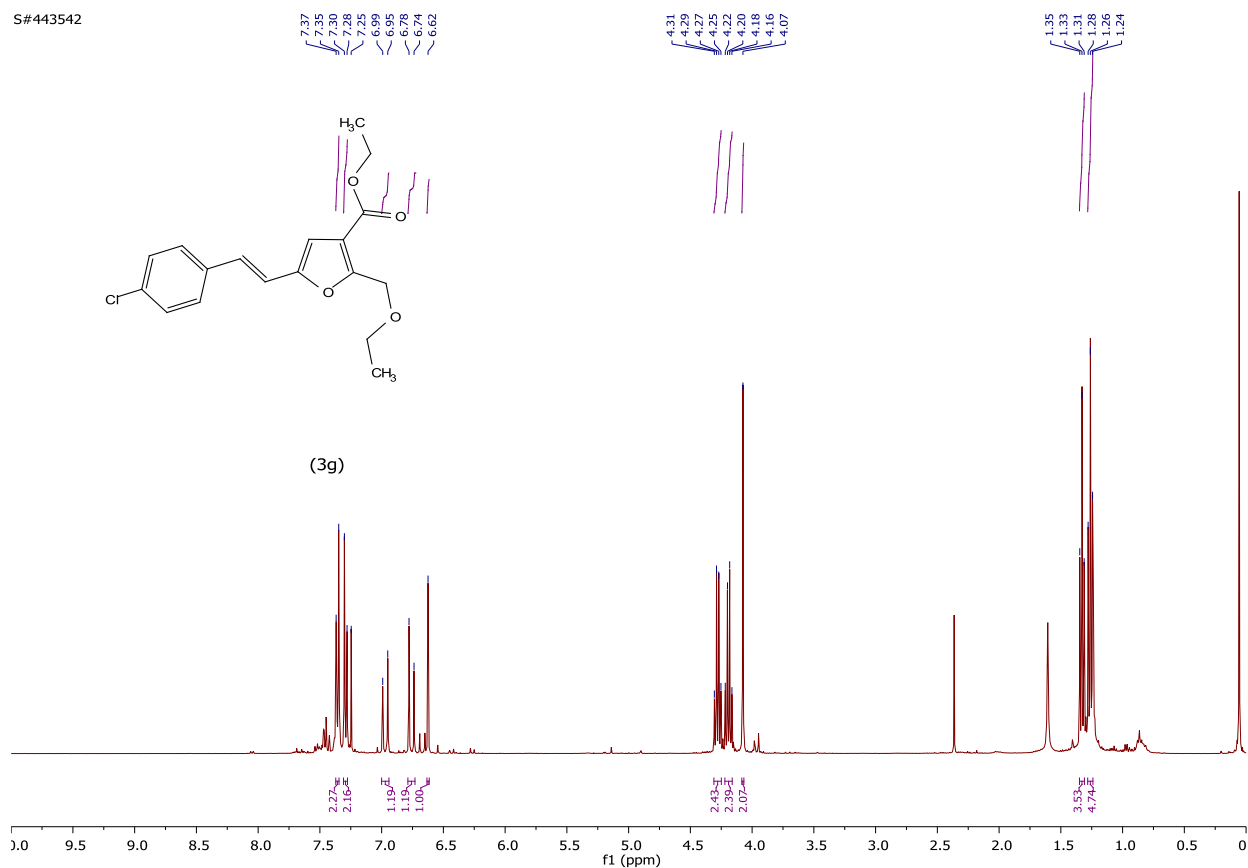

S#603041

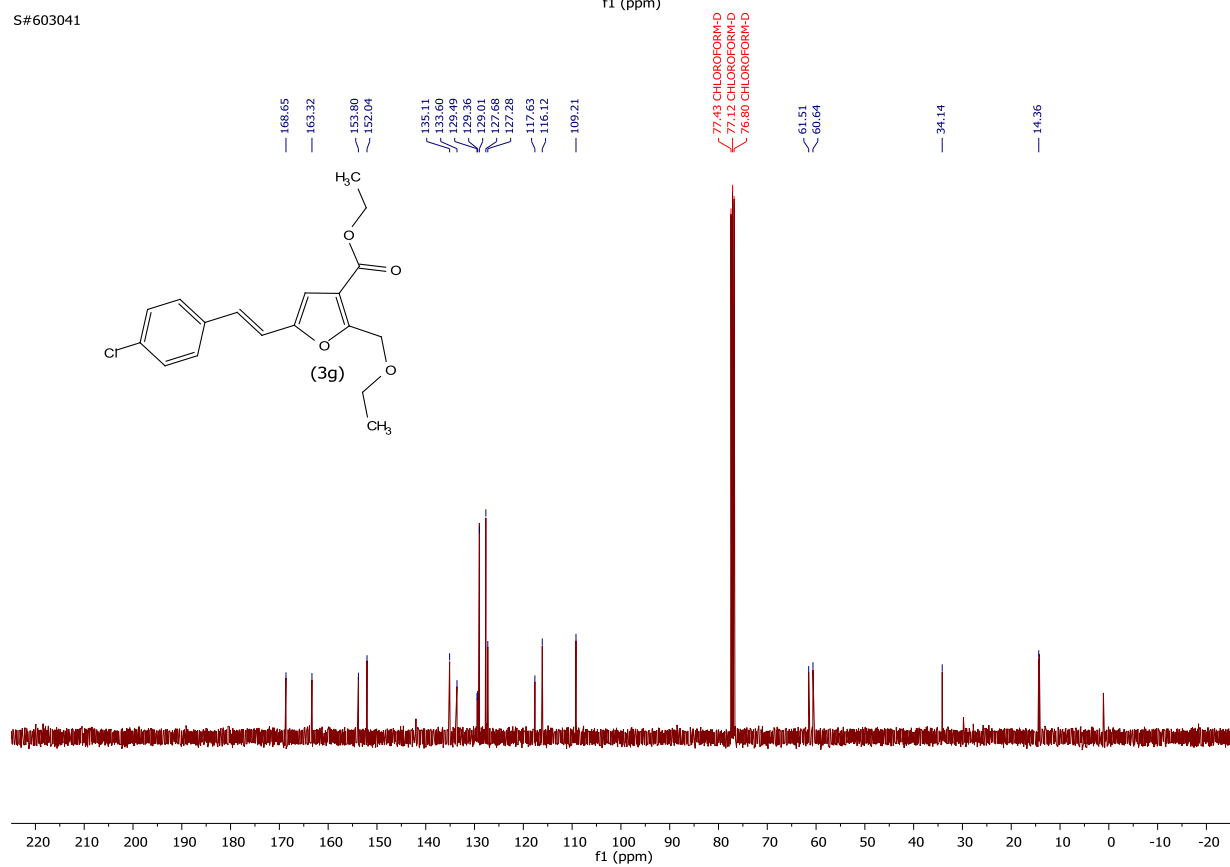

S#452650

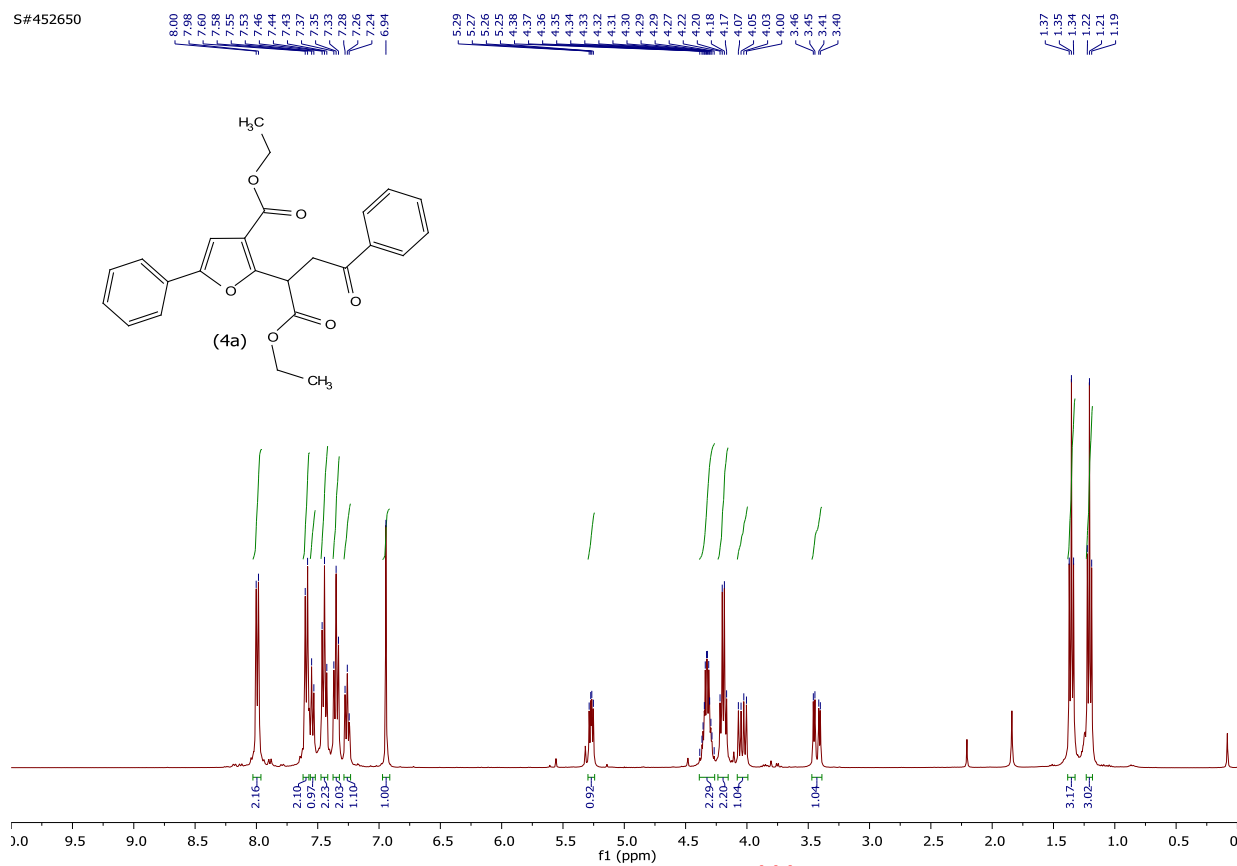

S#216696

single pulse decoupled gated NOE

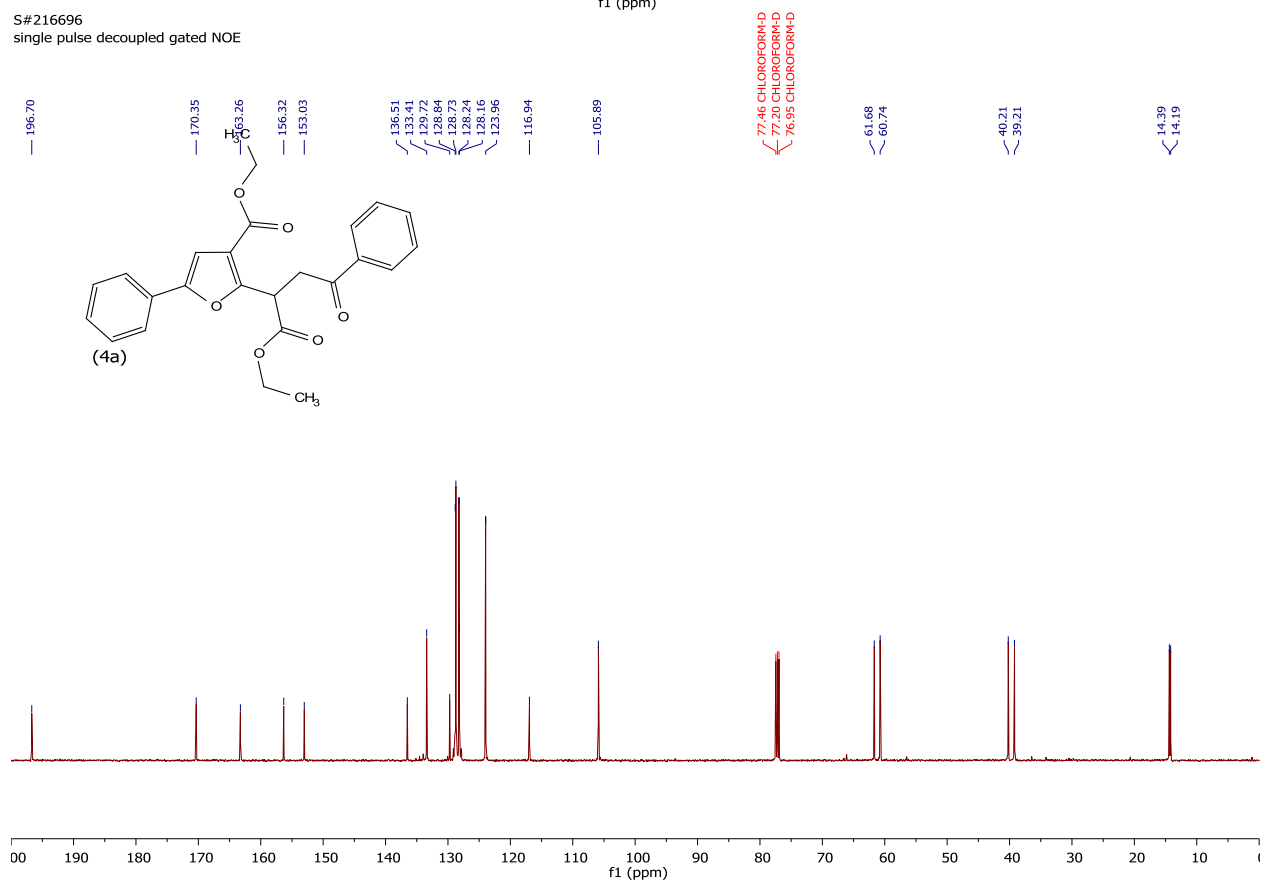

S#352714

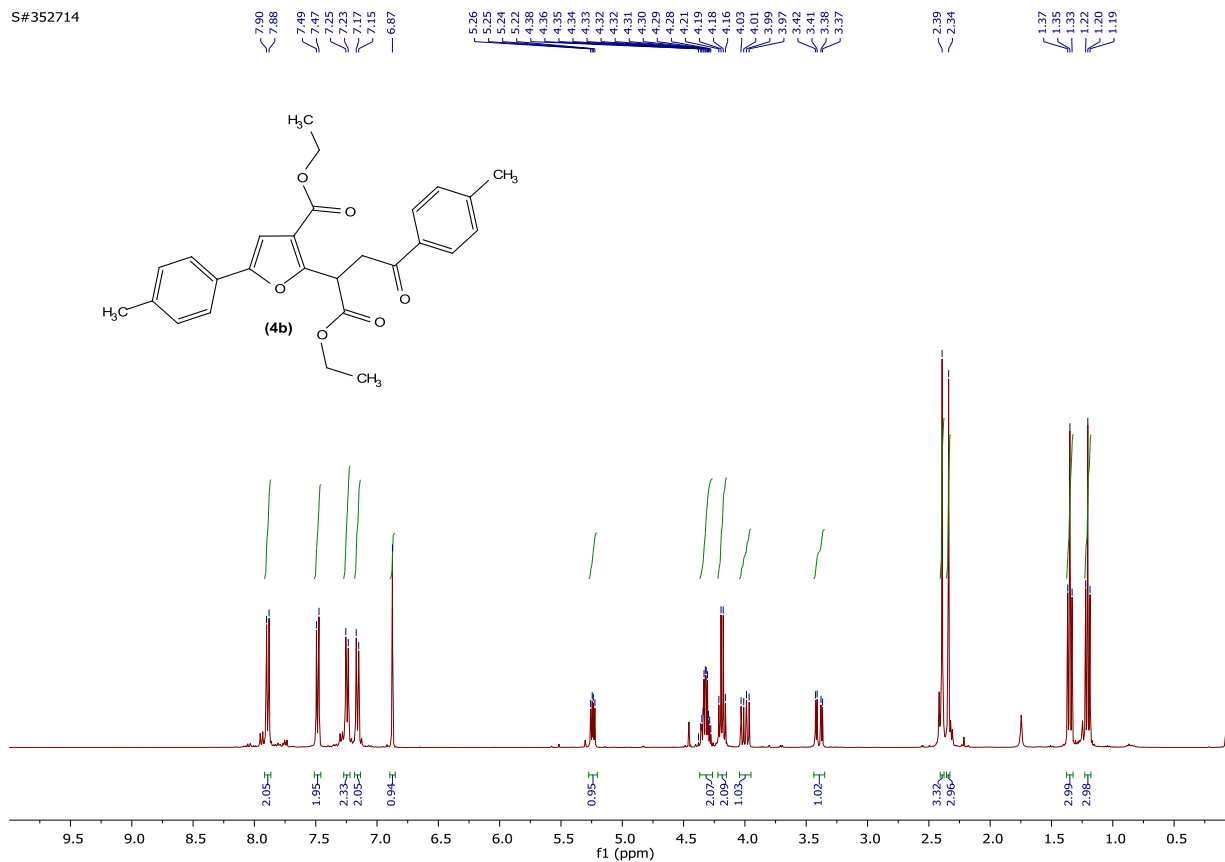

S#280916

single pulse decoupled gated NOE

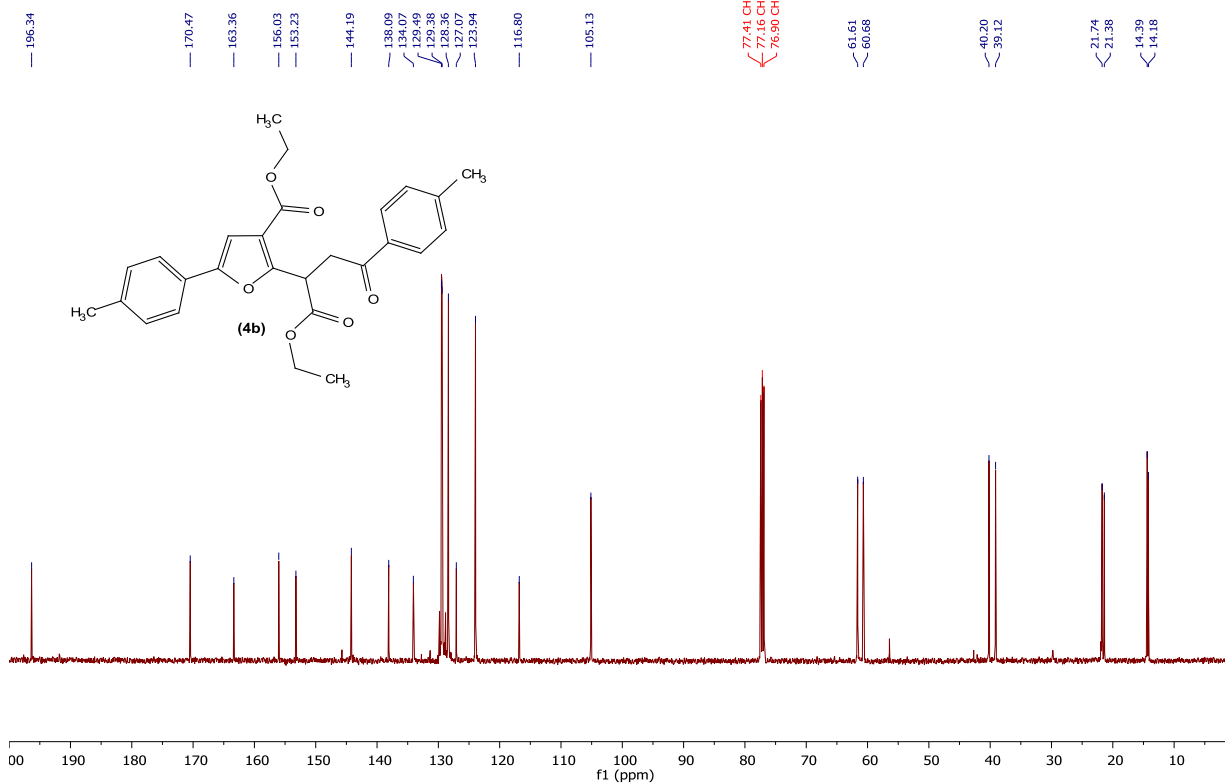

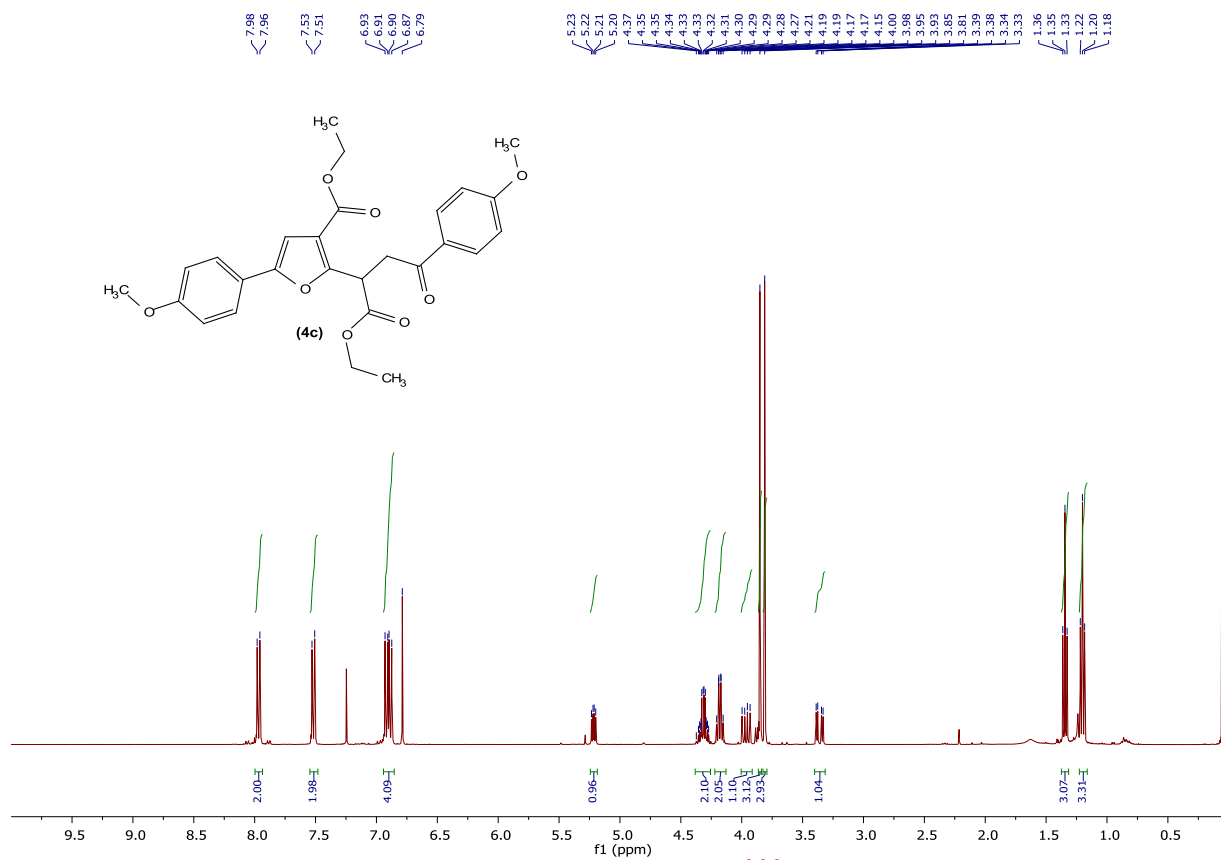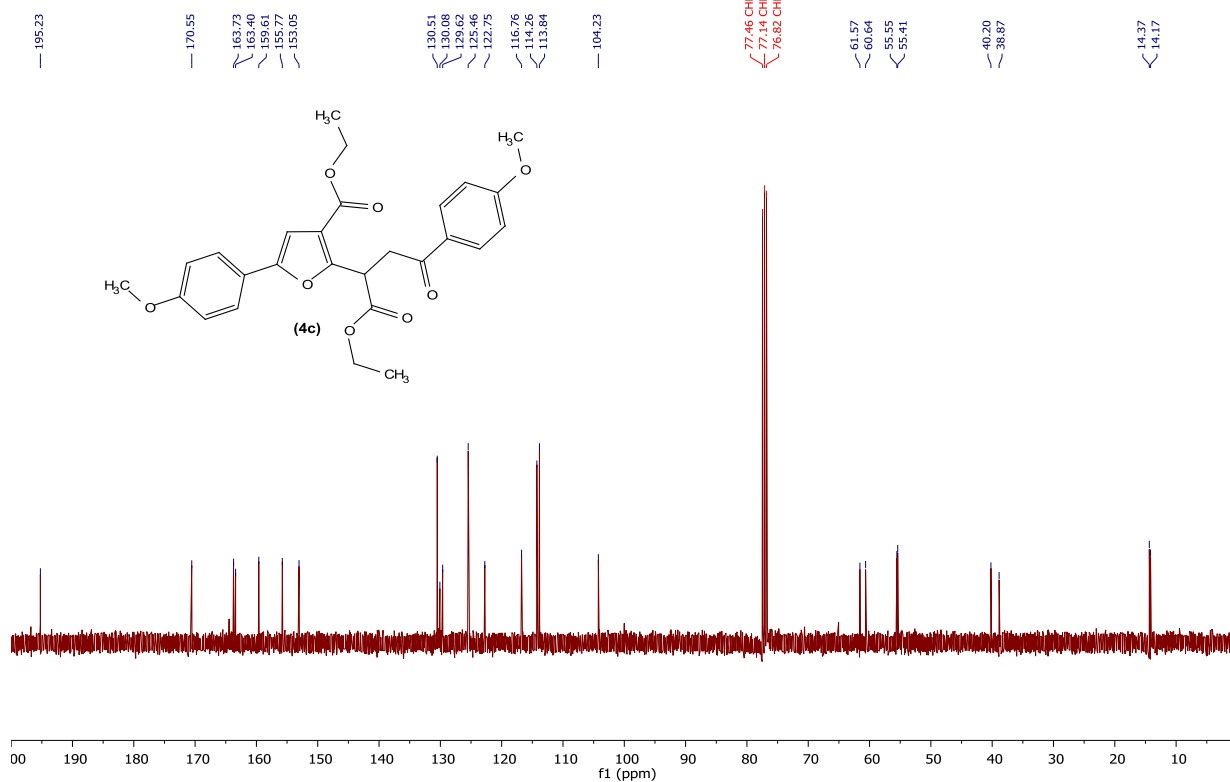

S#361900

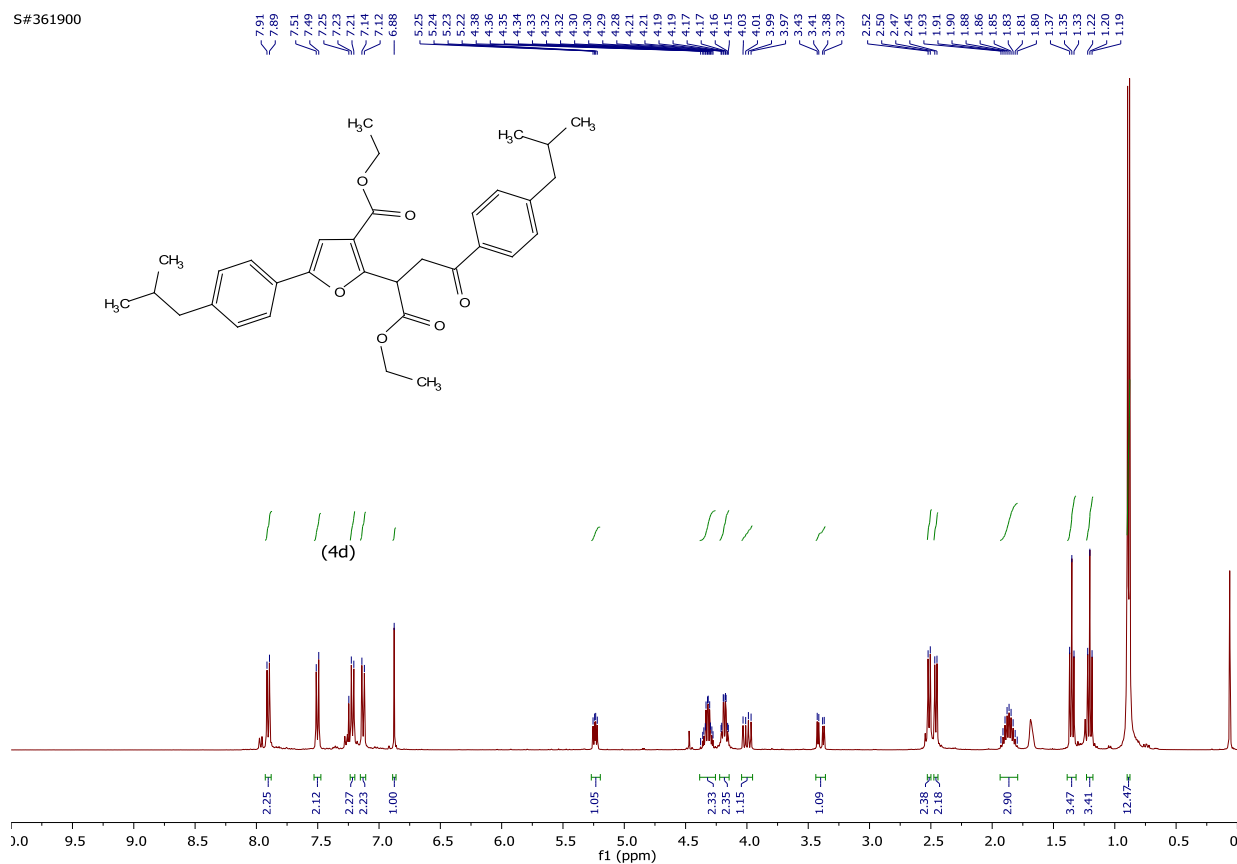

S#607952

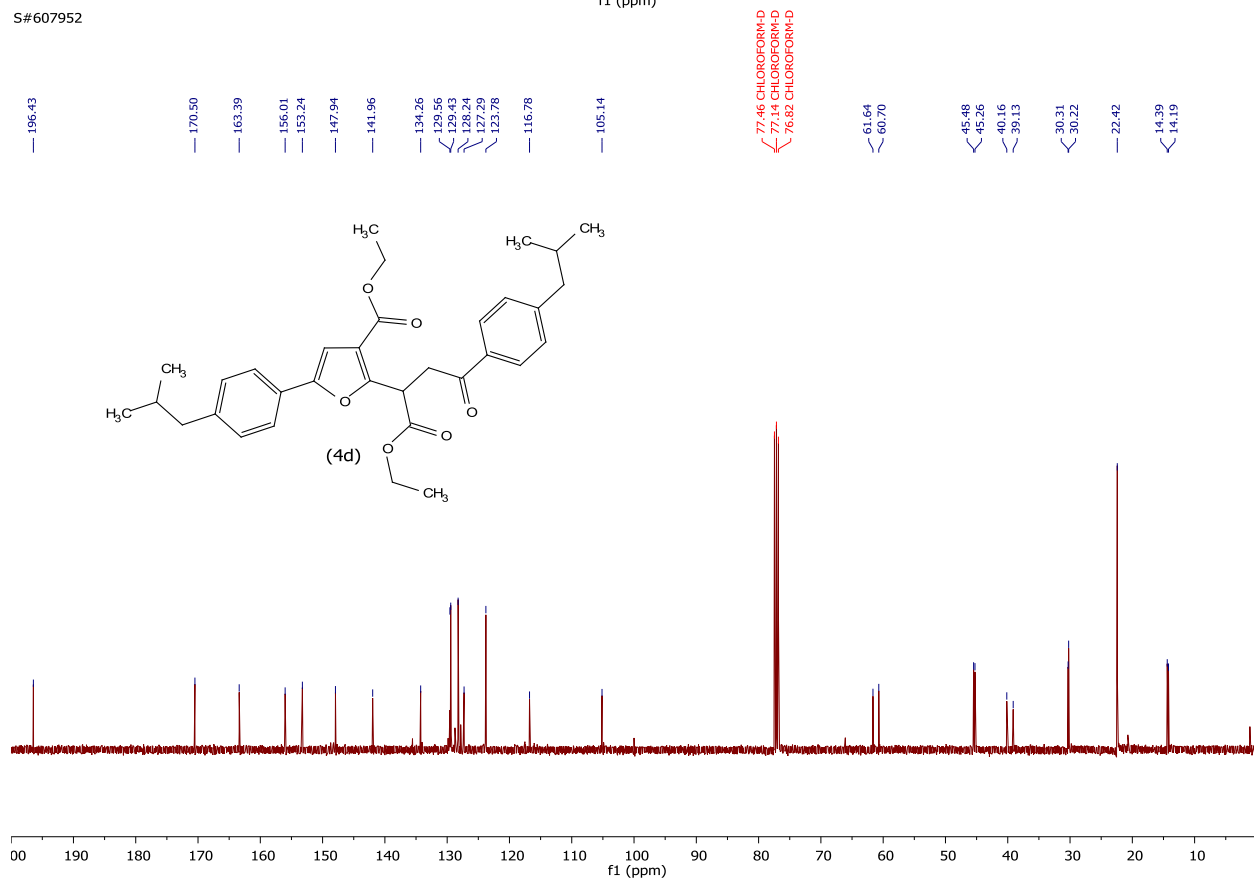

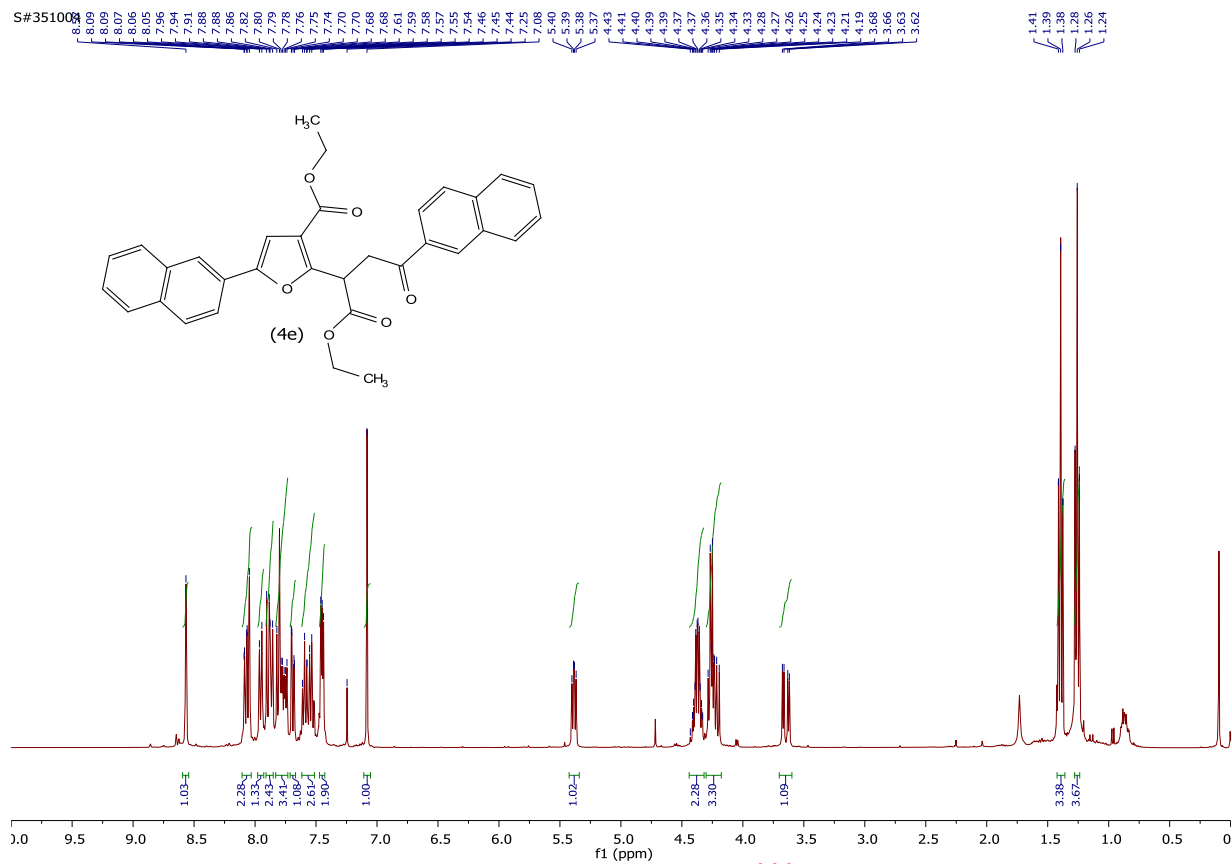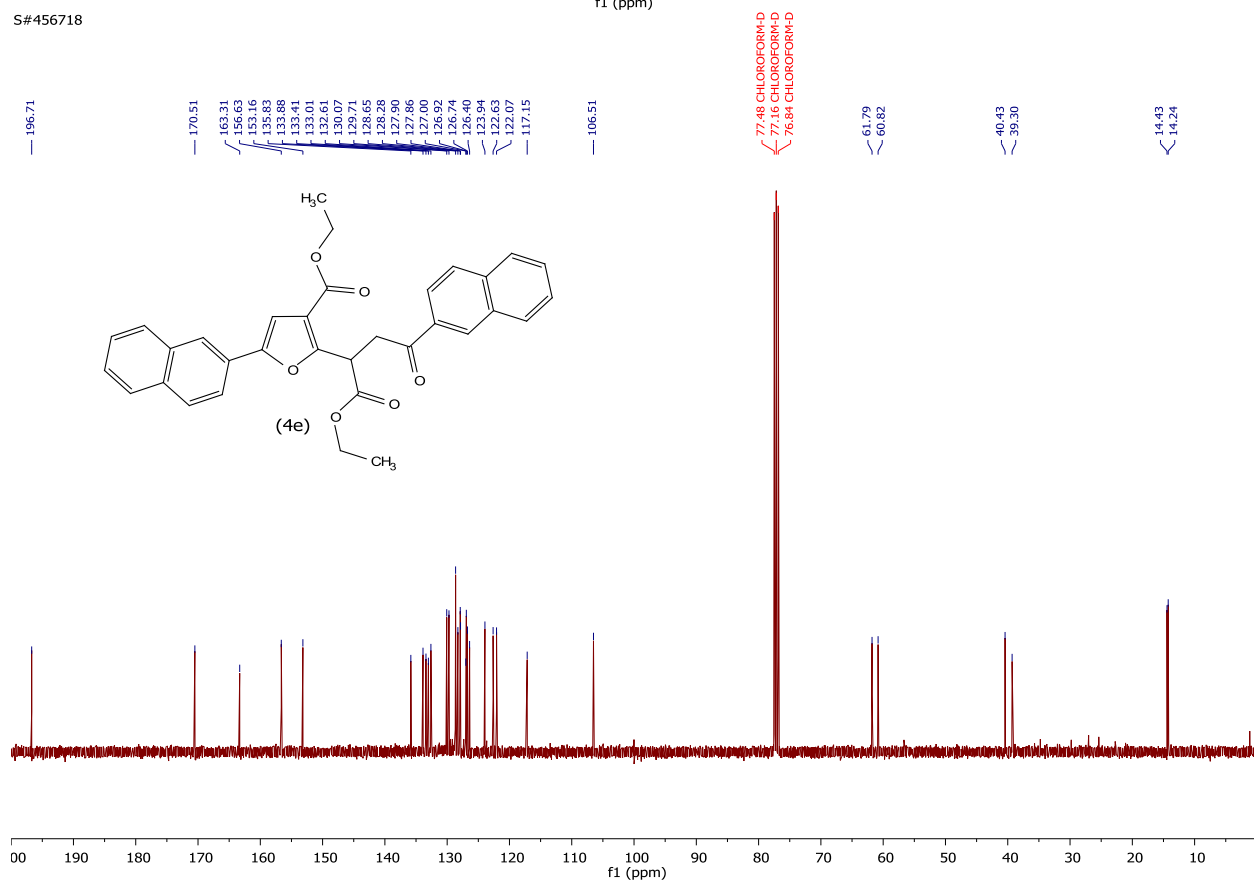



S#491264

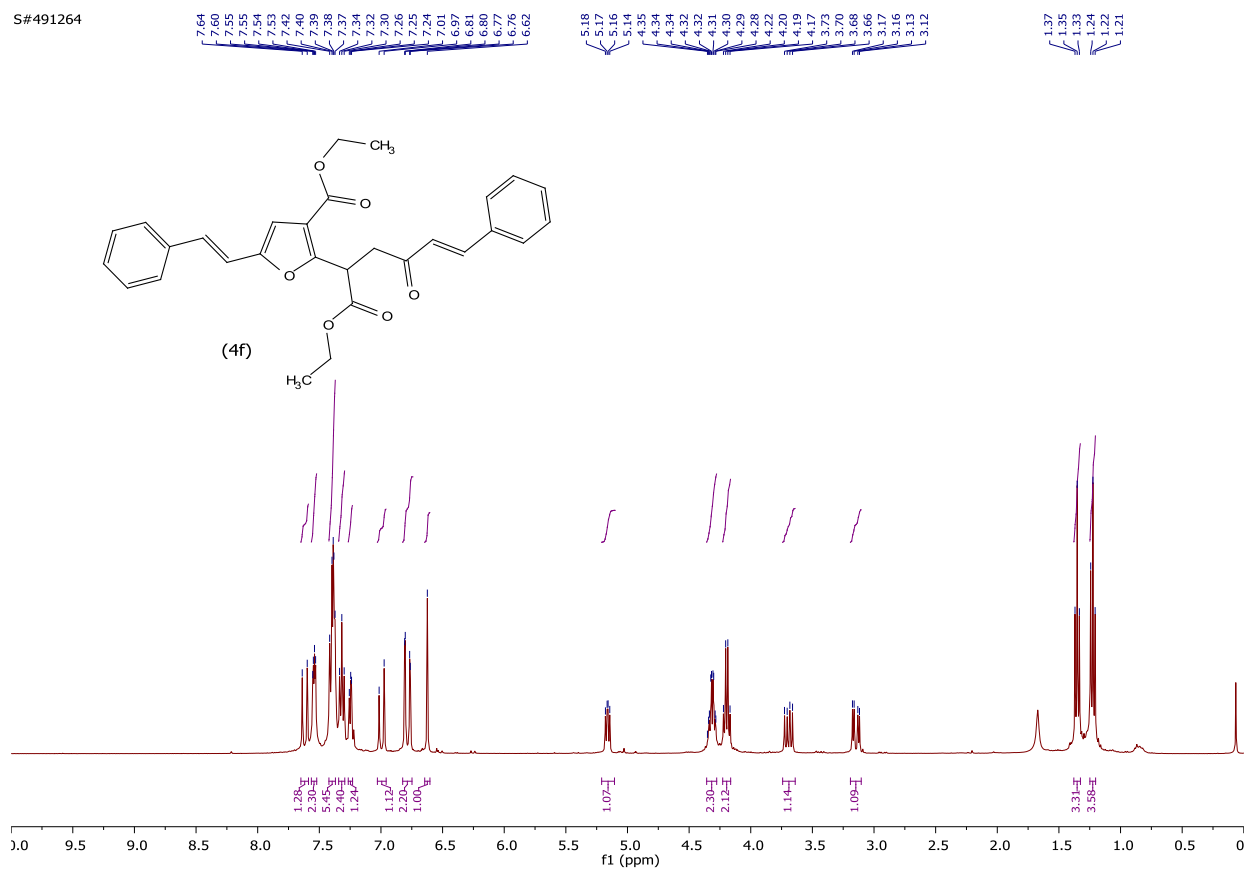

S#685150

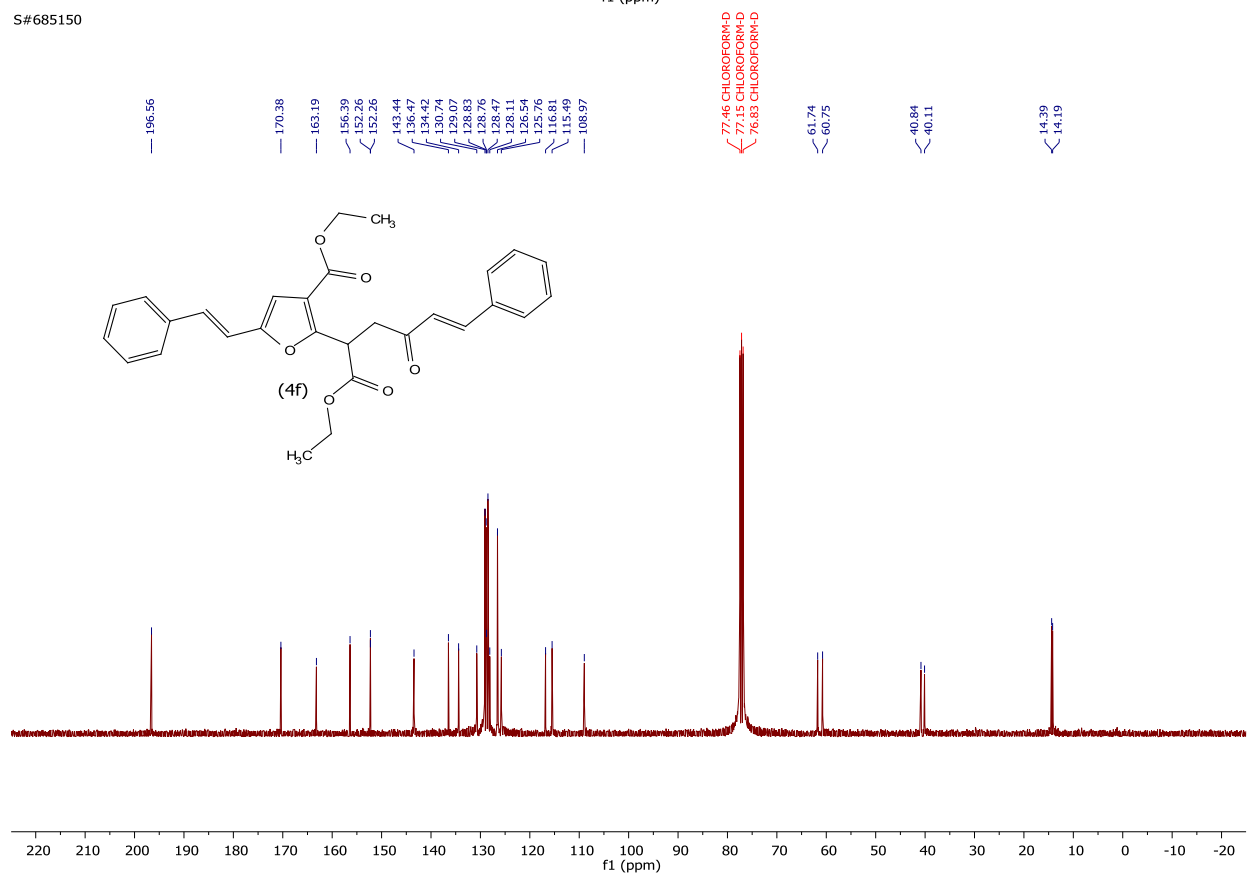

S#433377

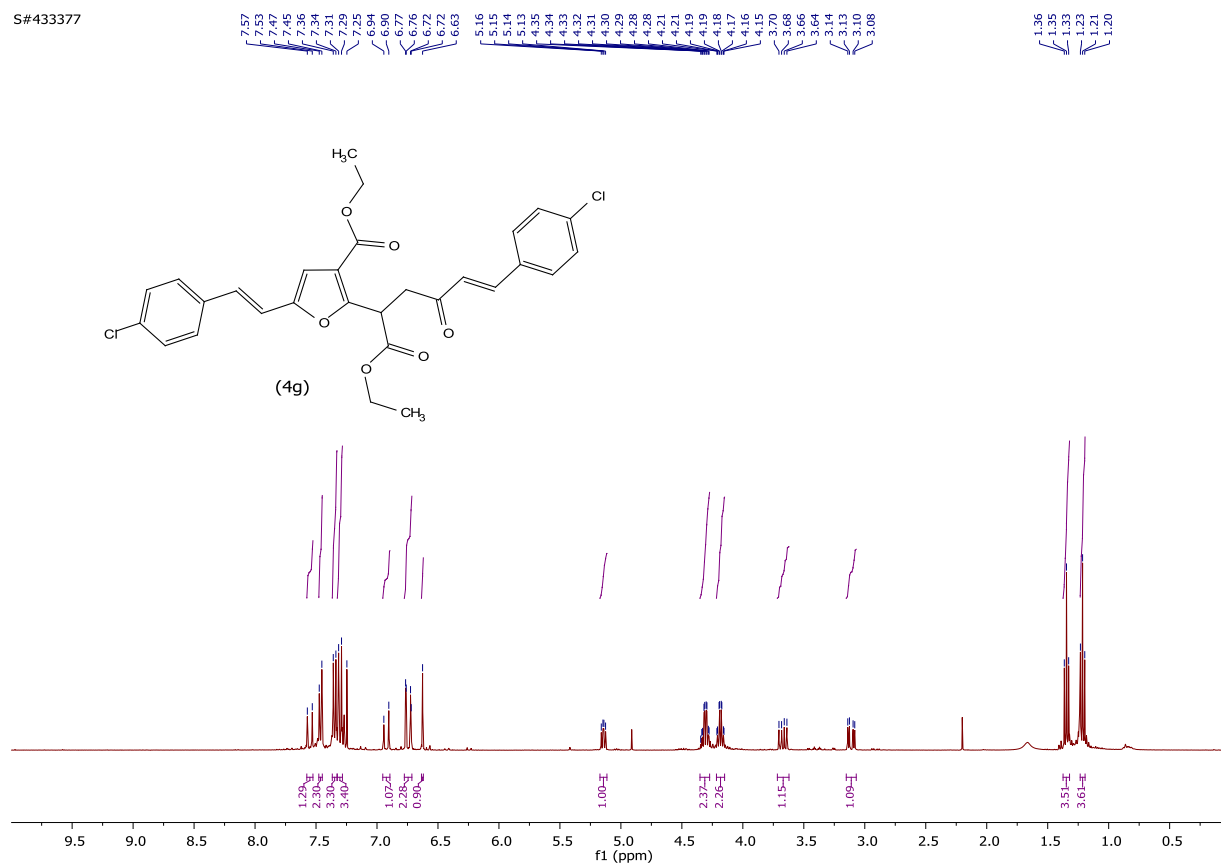

S#767237

single pulse decoupled gated NOE

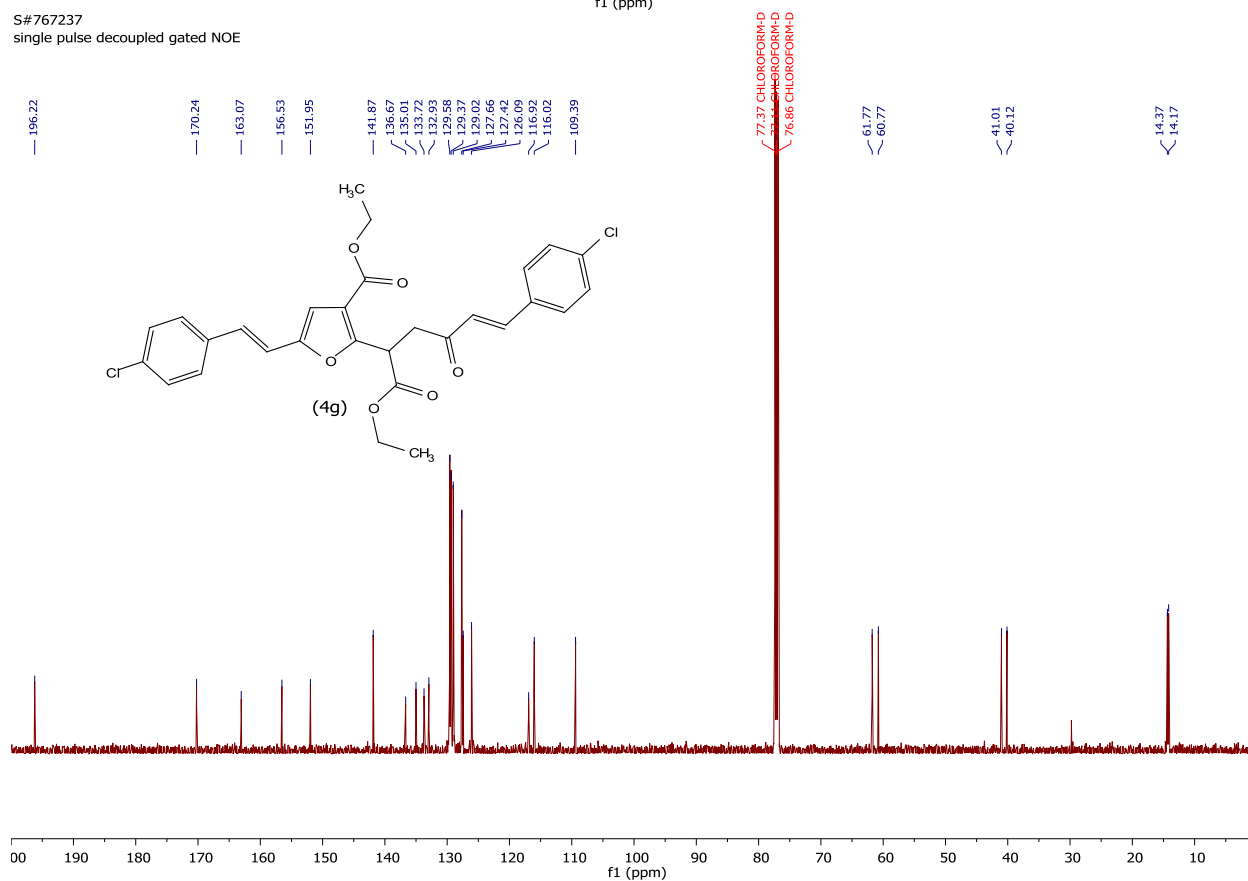

S#471370

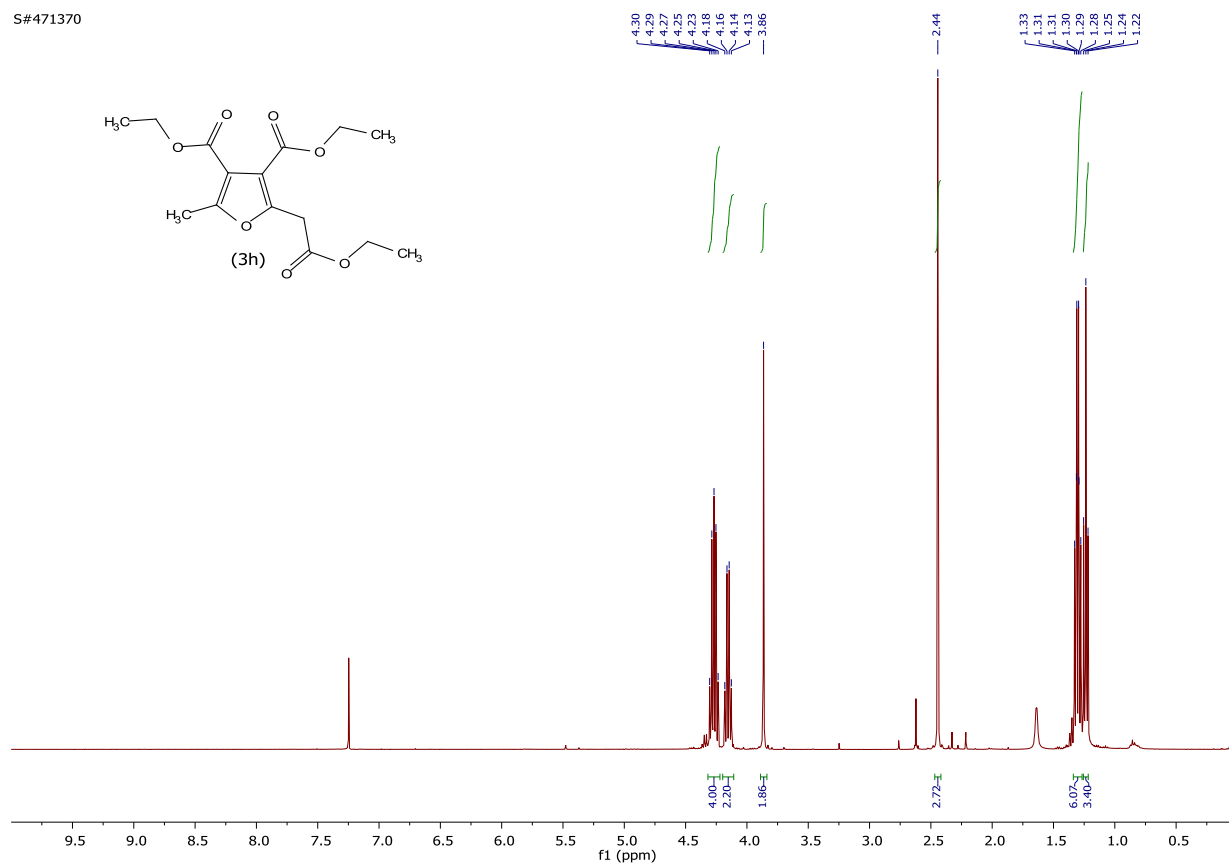

S#605750

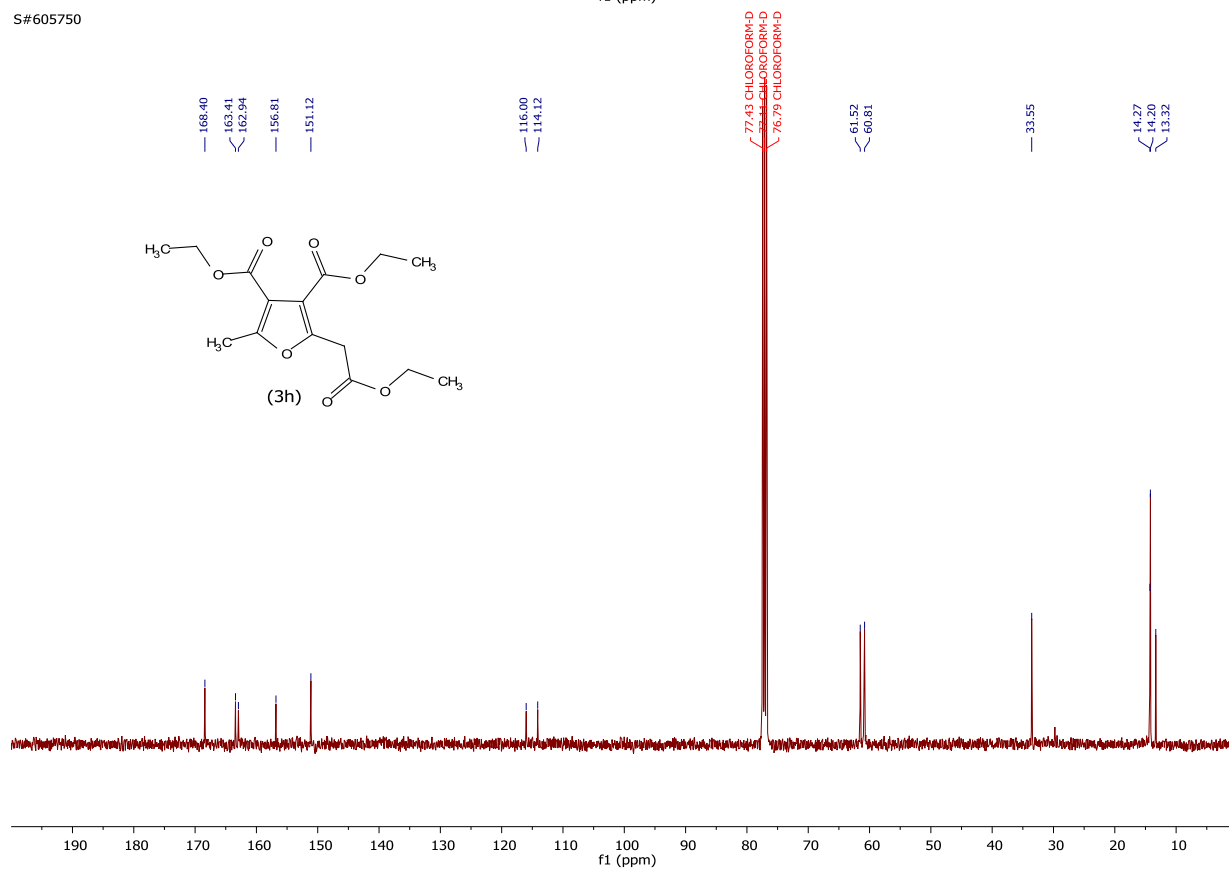

S#417287

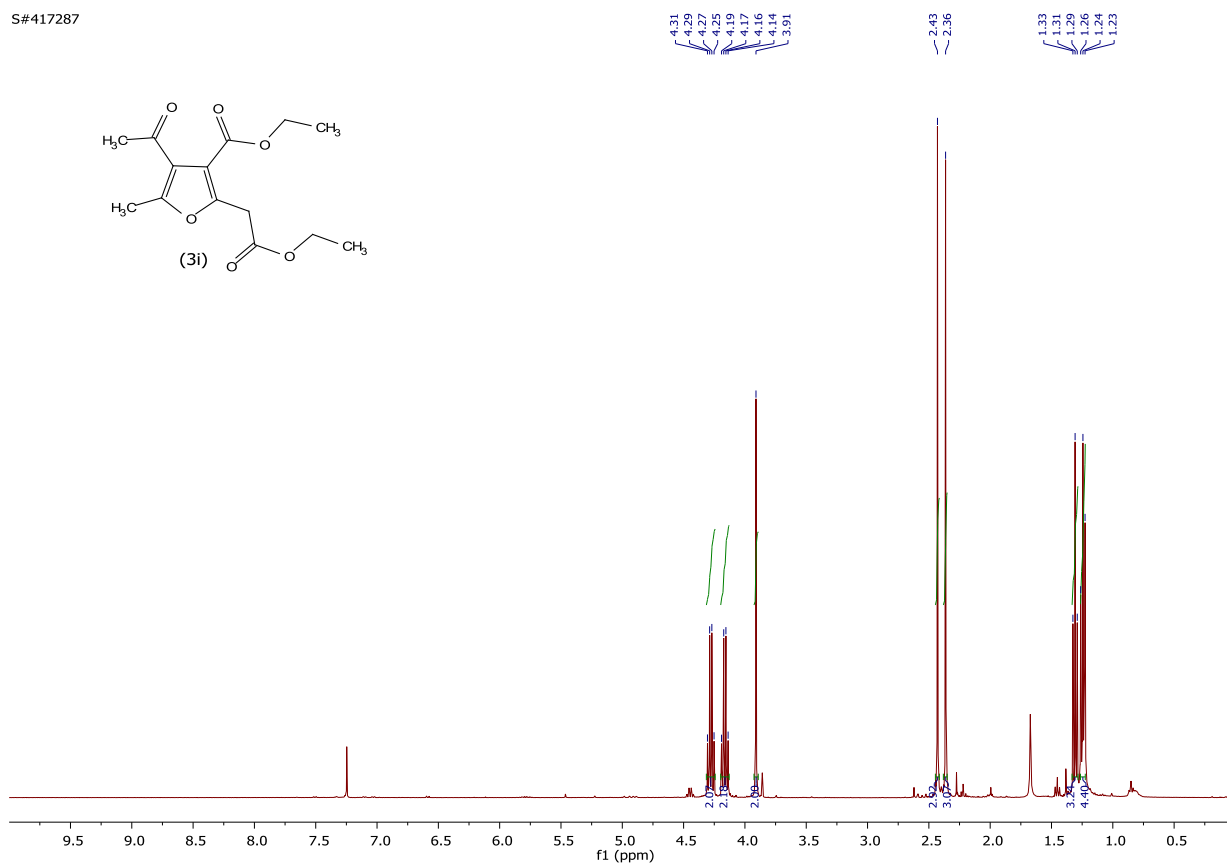

S#441779

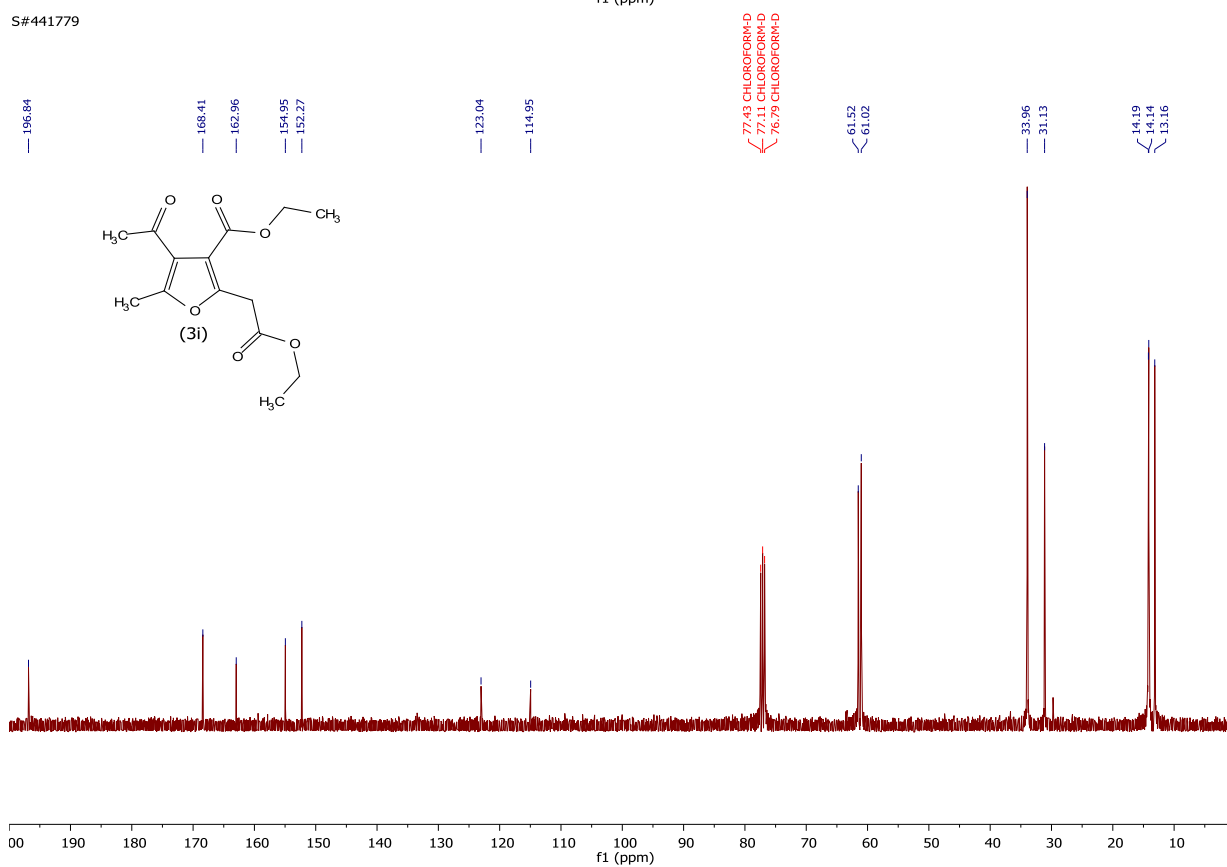

S#437874

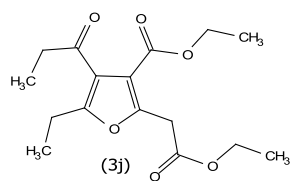

4.27  
4.25  
4.23  
4.22  
4.18  
4.16  
4.14  
4.12  
3.92

2.76  
2.74  
2.72  
2.70  
2.69  
2.68  
2.65  
2.63

1.29  
1.28  
1.26  
1.25  
1.23  
1.21  
1.19  
1.17  
1.15  
1.11  
1.10  
1.08

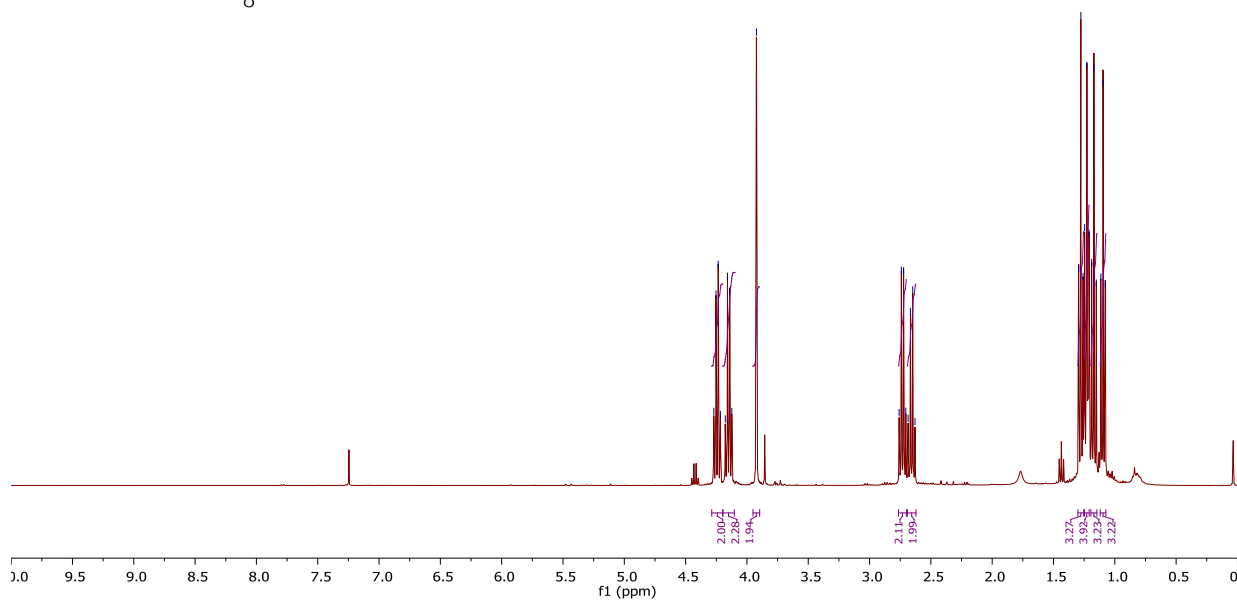

S#603663

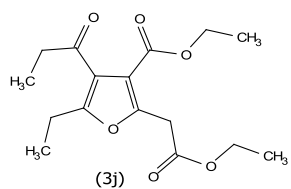

168.47  
162.04  
158.08  
152.35

122.01  
114.68

77.46  
77.14  
76.82

61.48  
60.96

36.91  
34.00

20.52  
14.20  
14.16  
12.68  
8.37

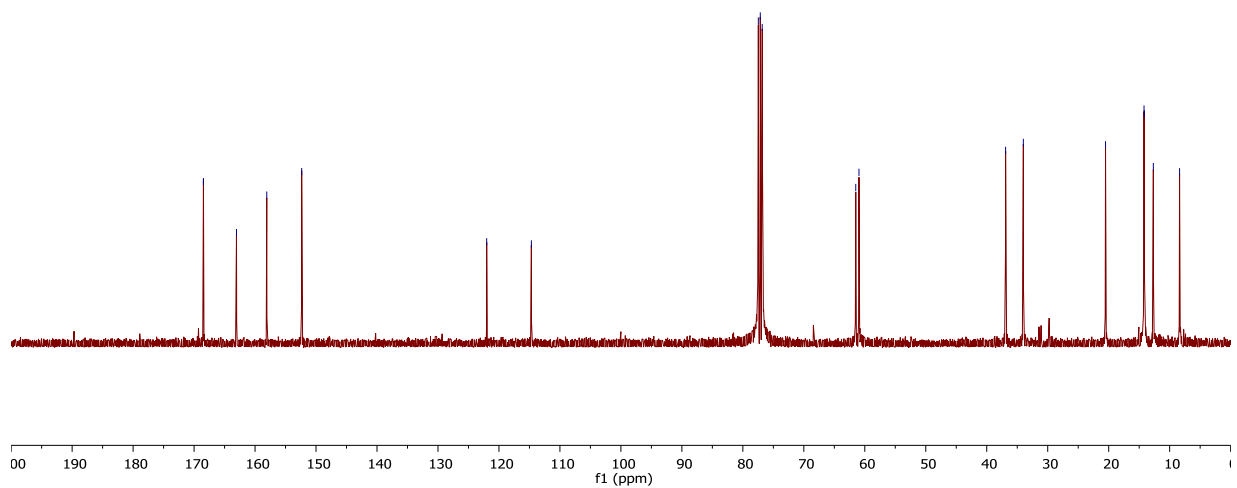

S#535840

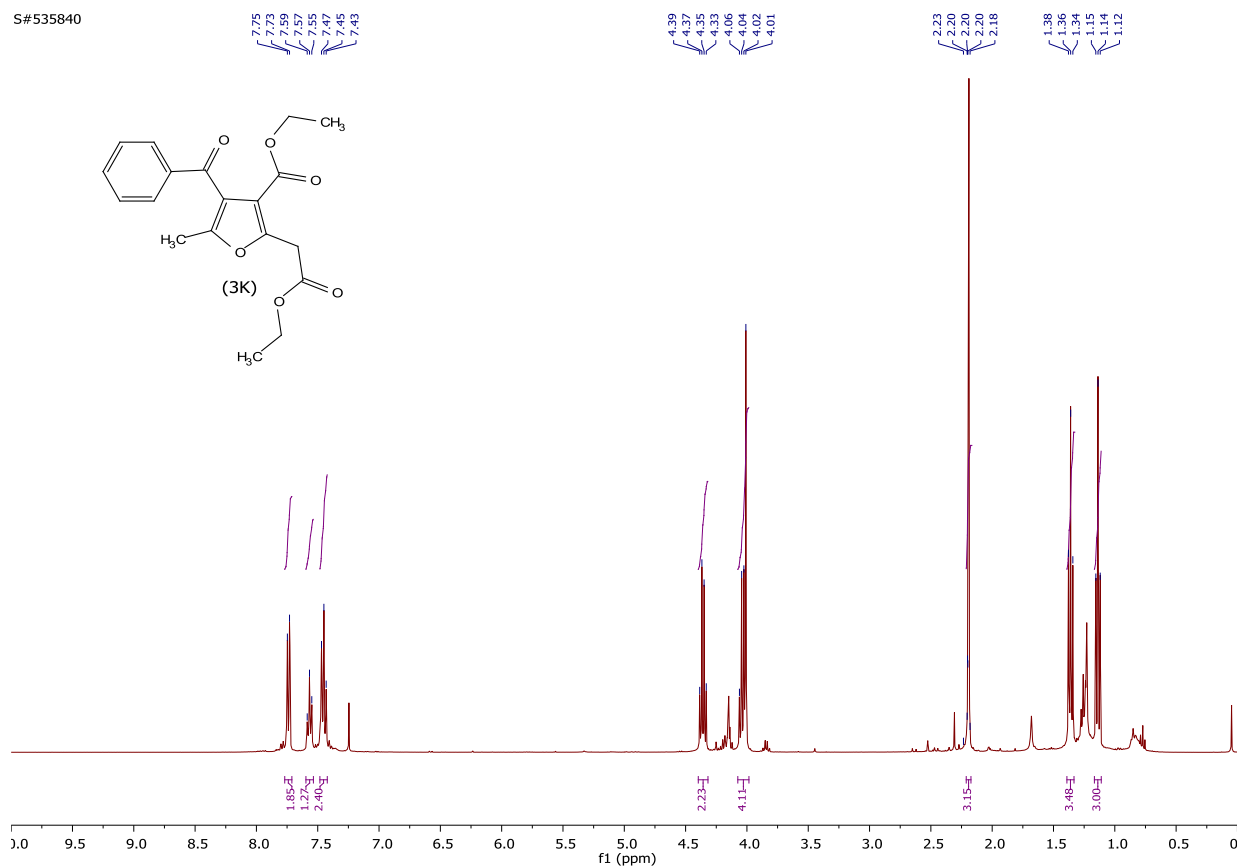

S#598926

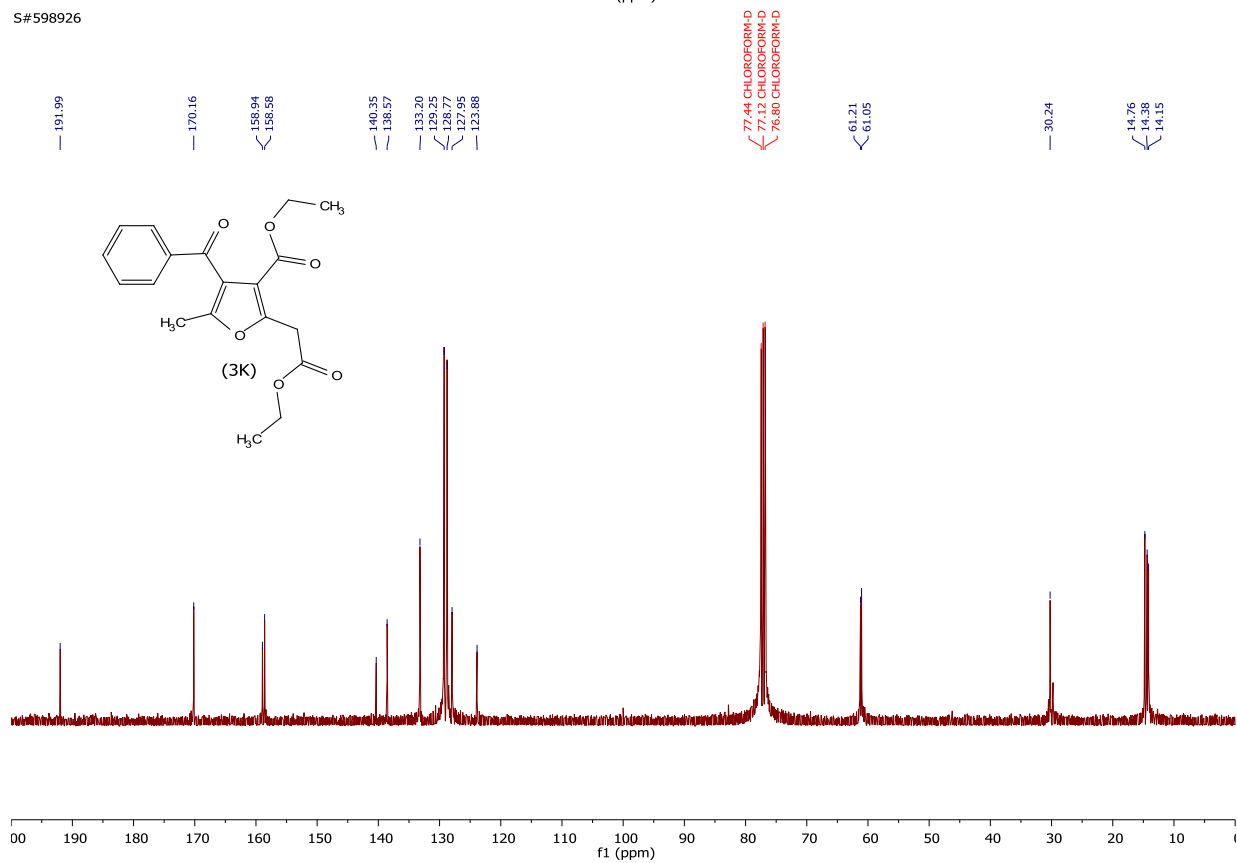

S#347562

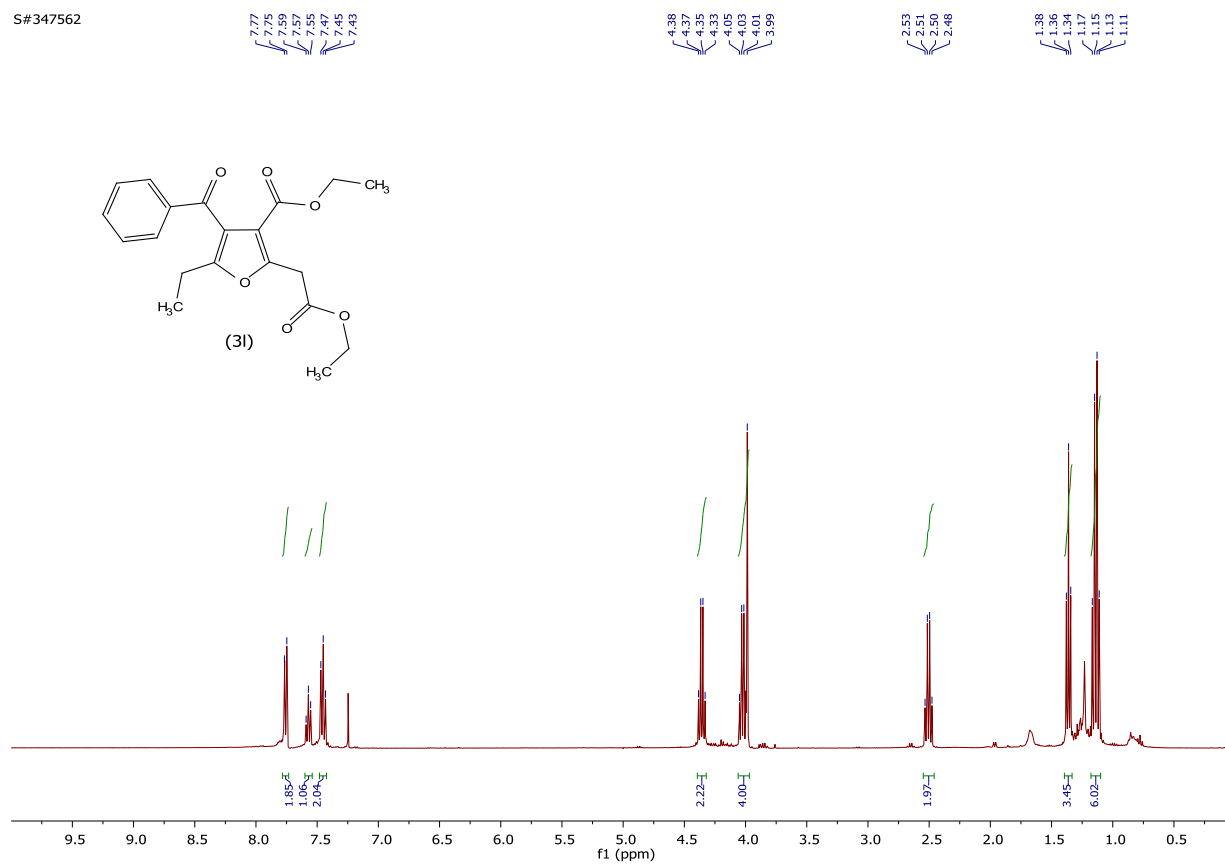

S#362539

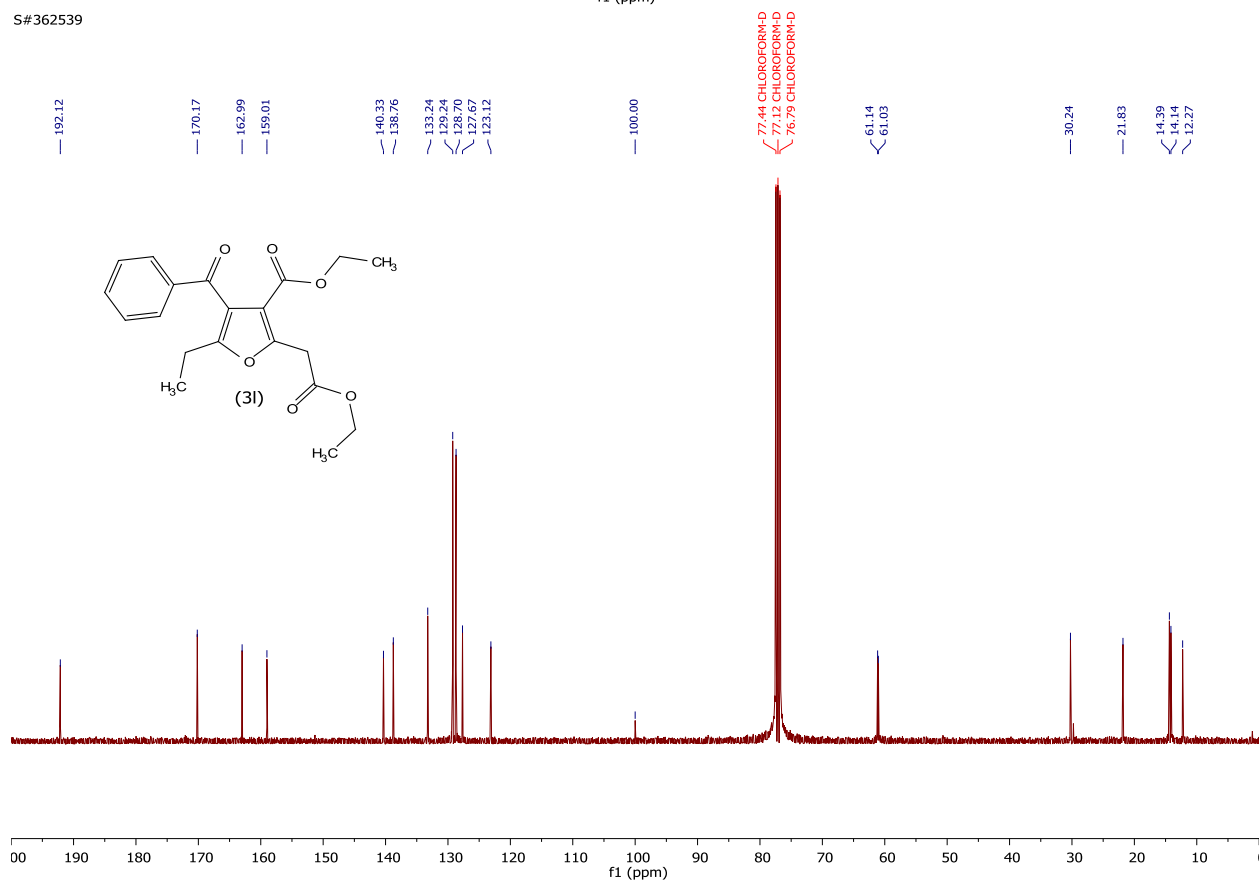

S#343981

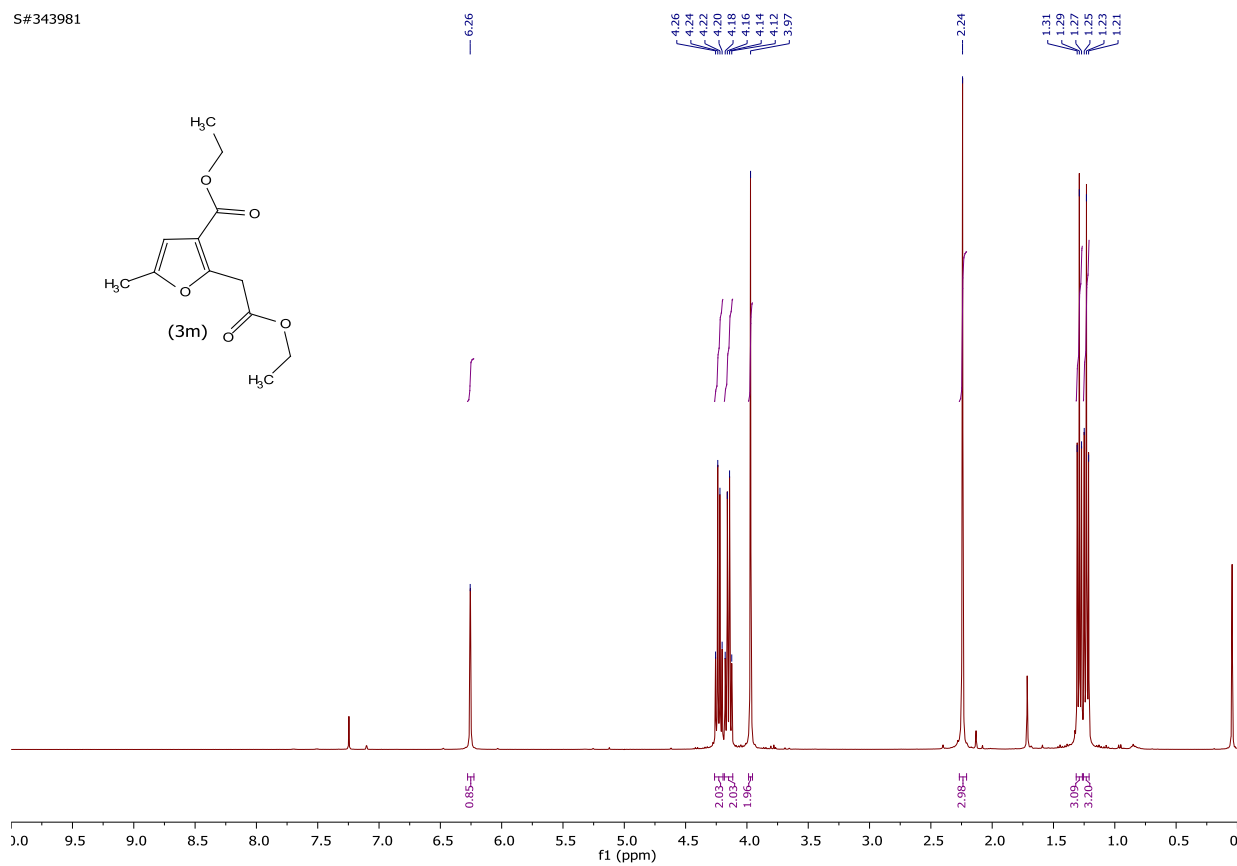

S#603698

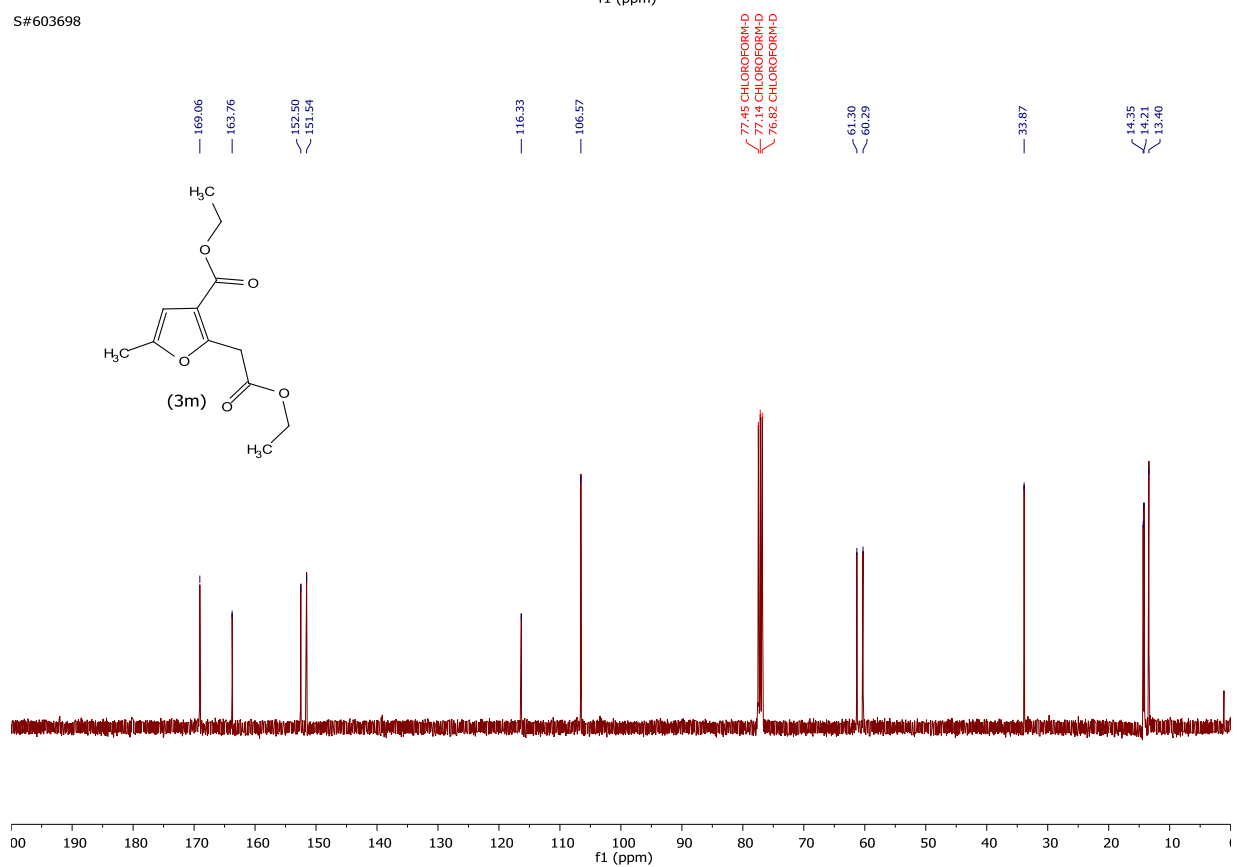



S#556945

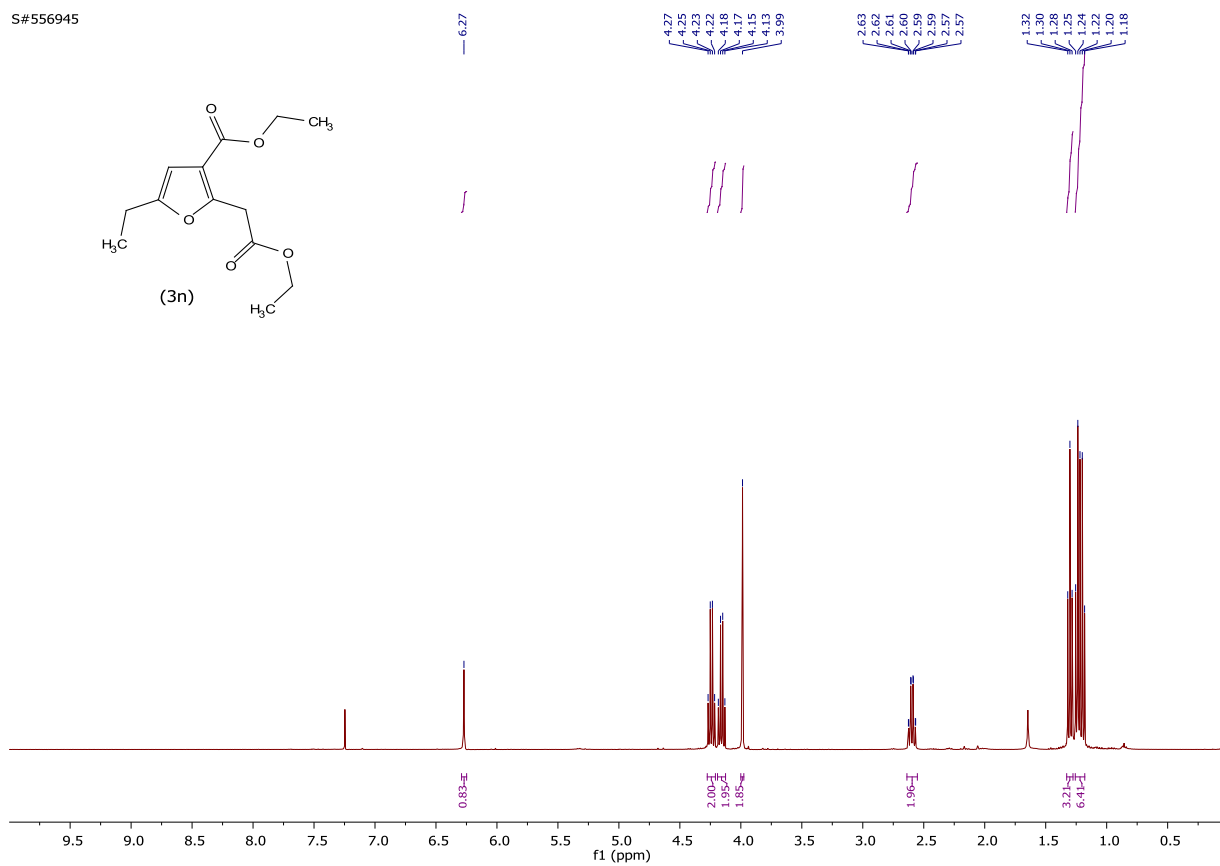

S#603063

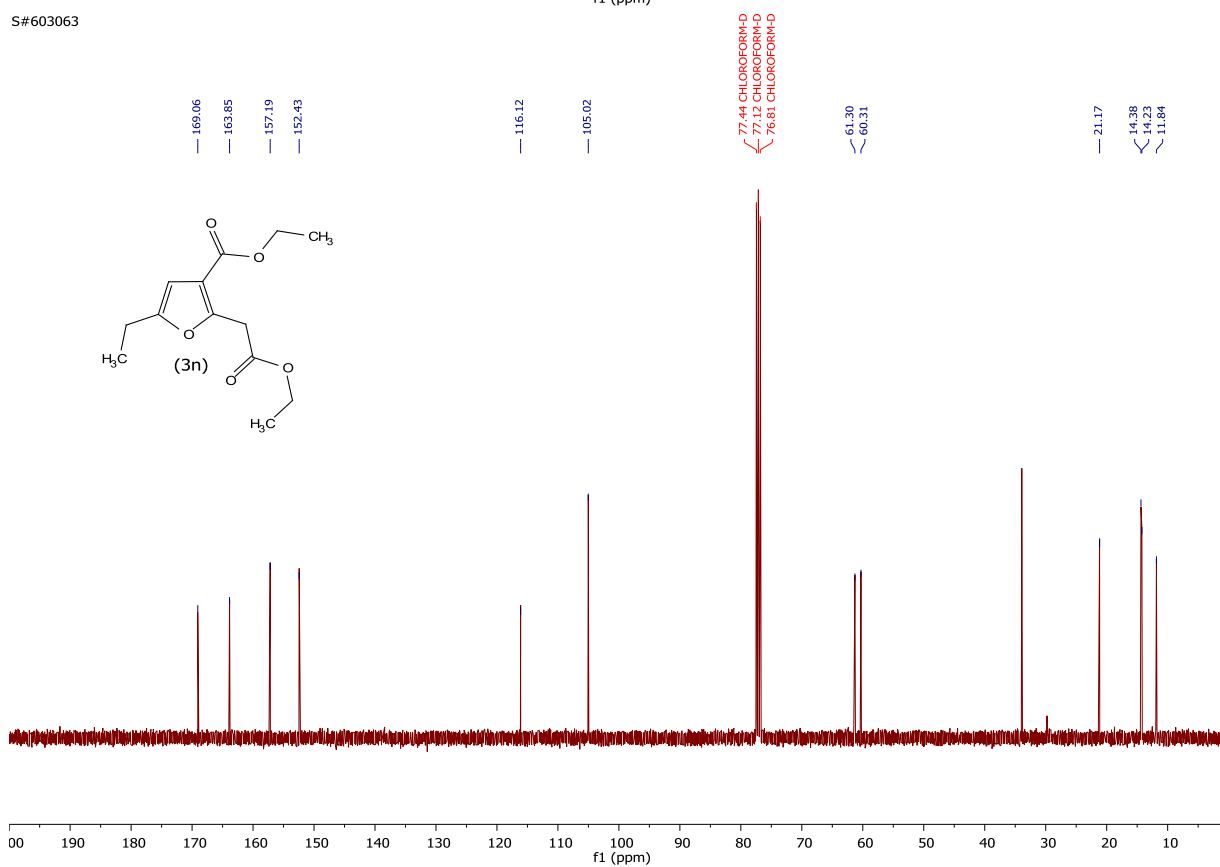

S#480083

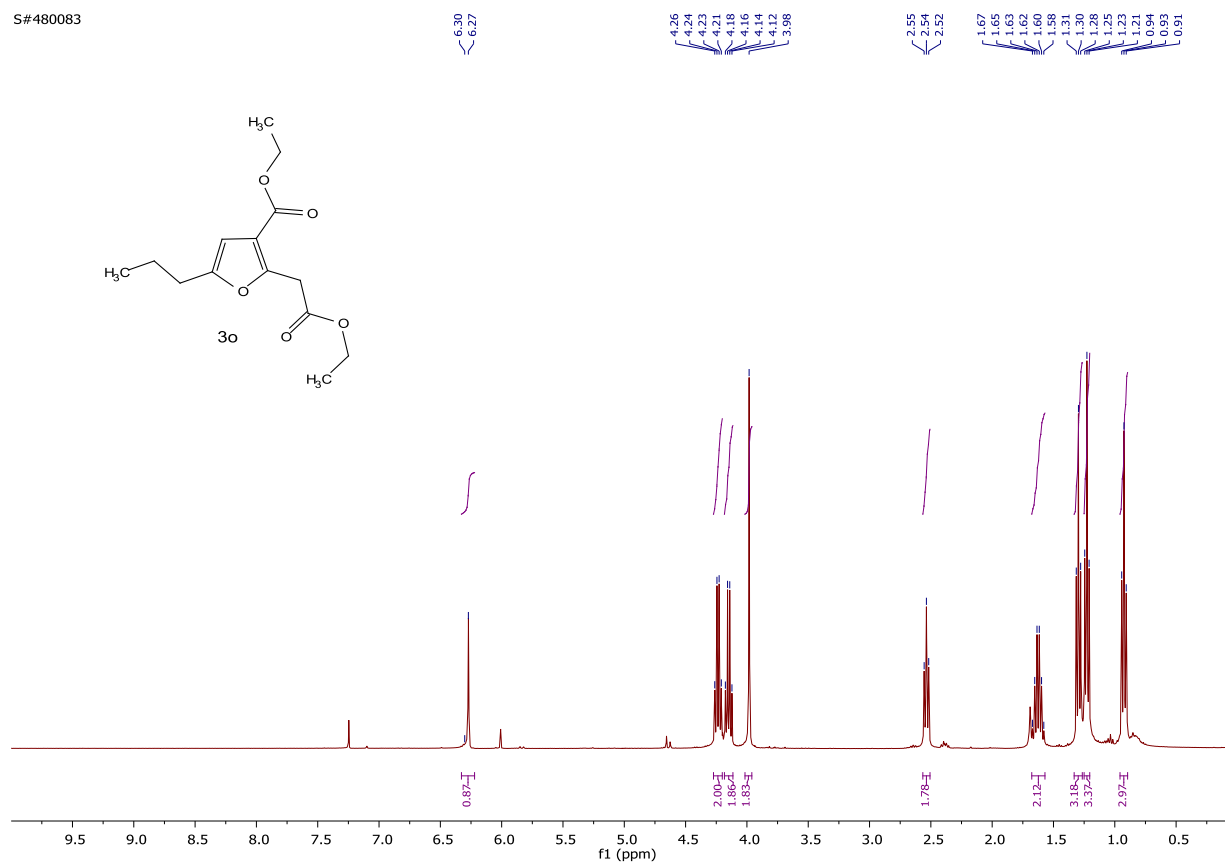

S#600698

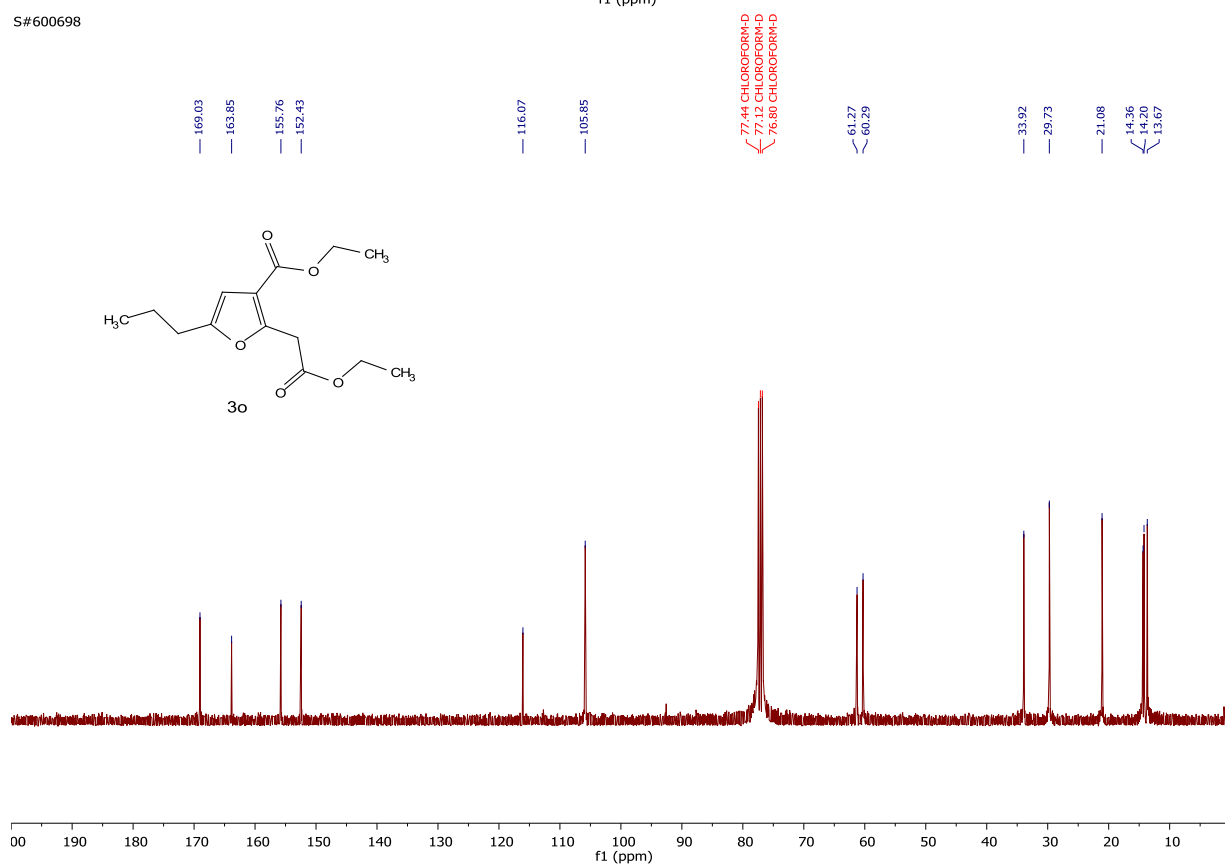

S#411444

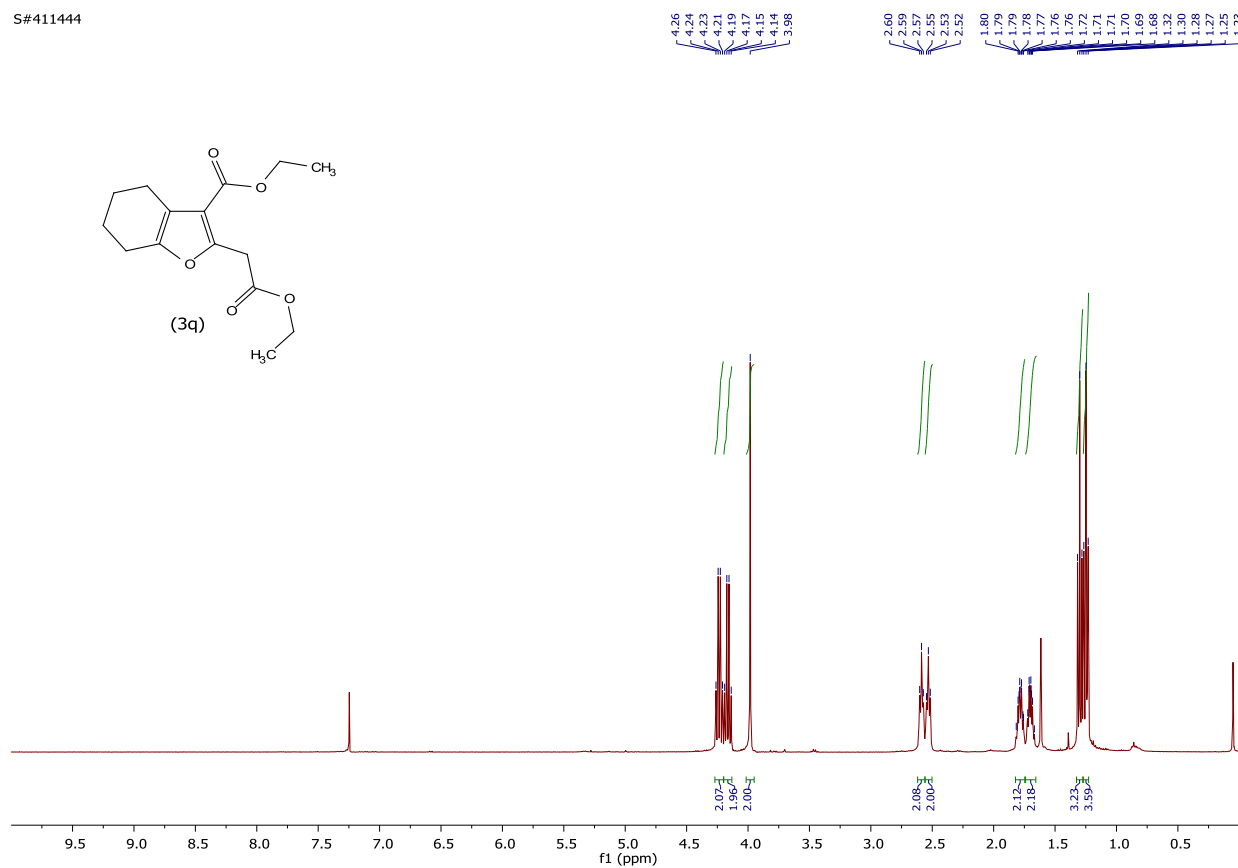

S#601590

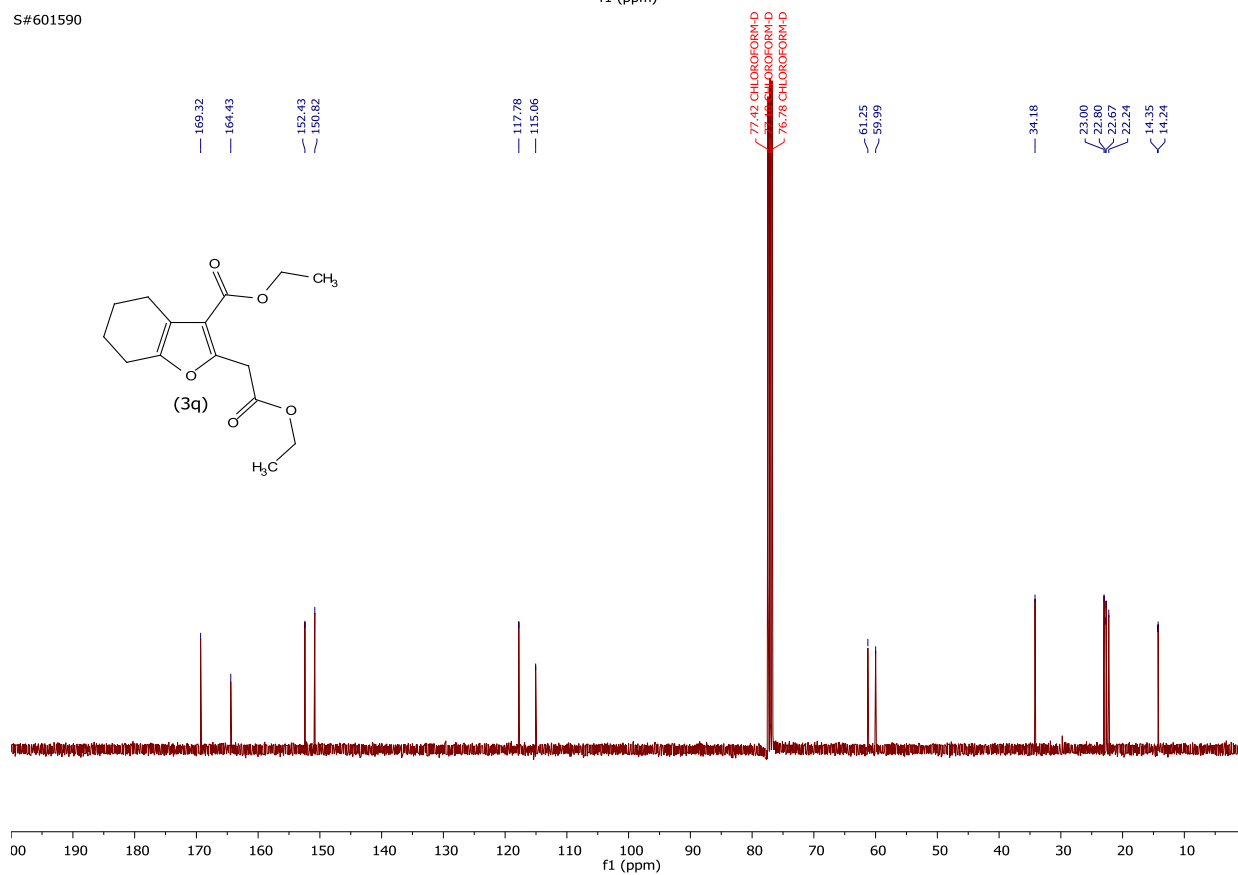

S#345396

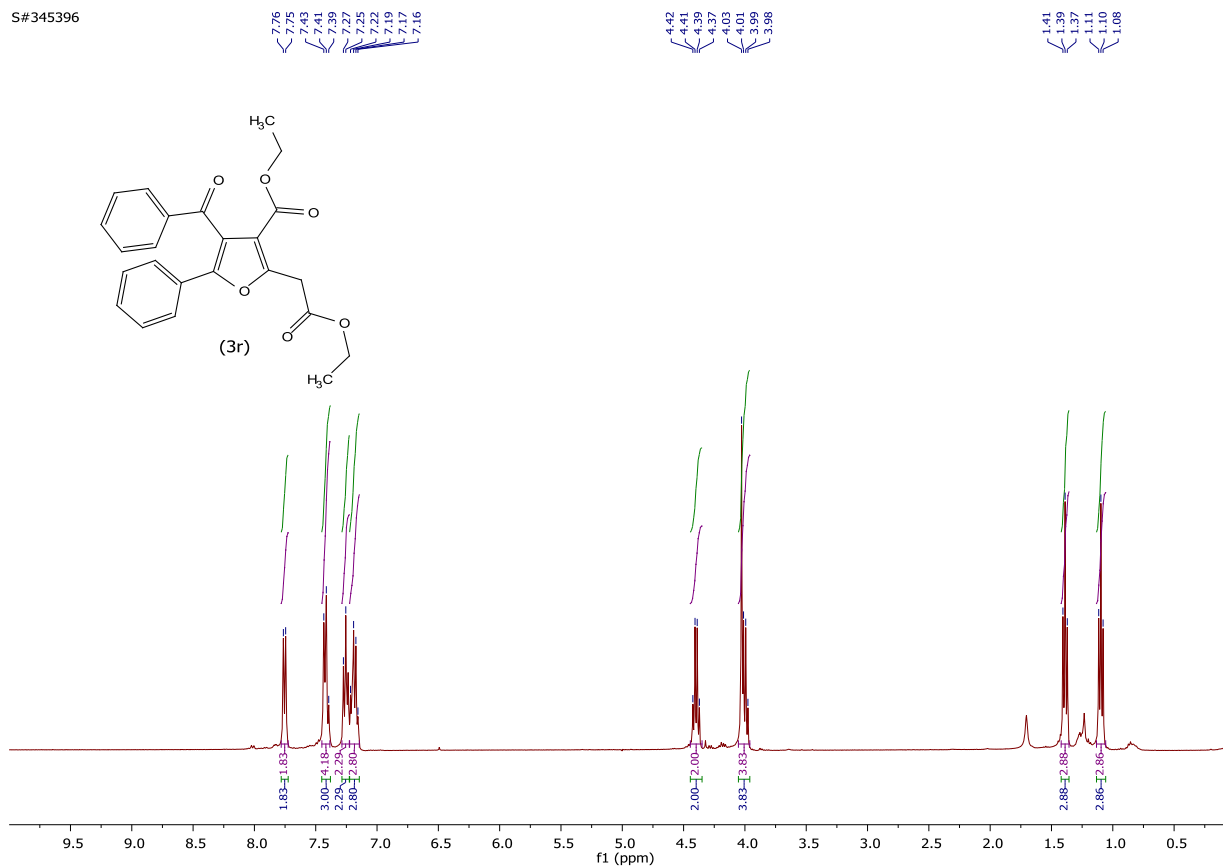

S#610439

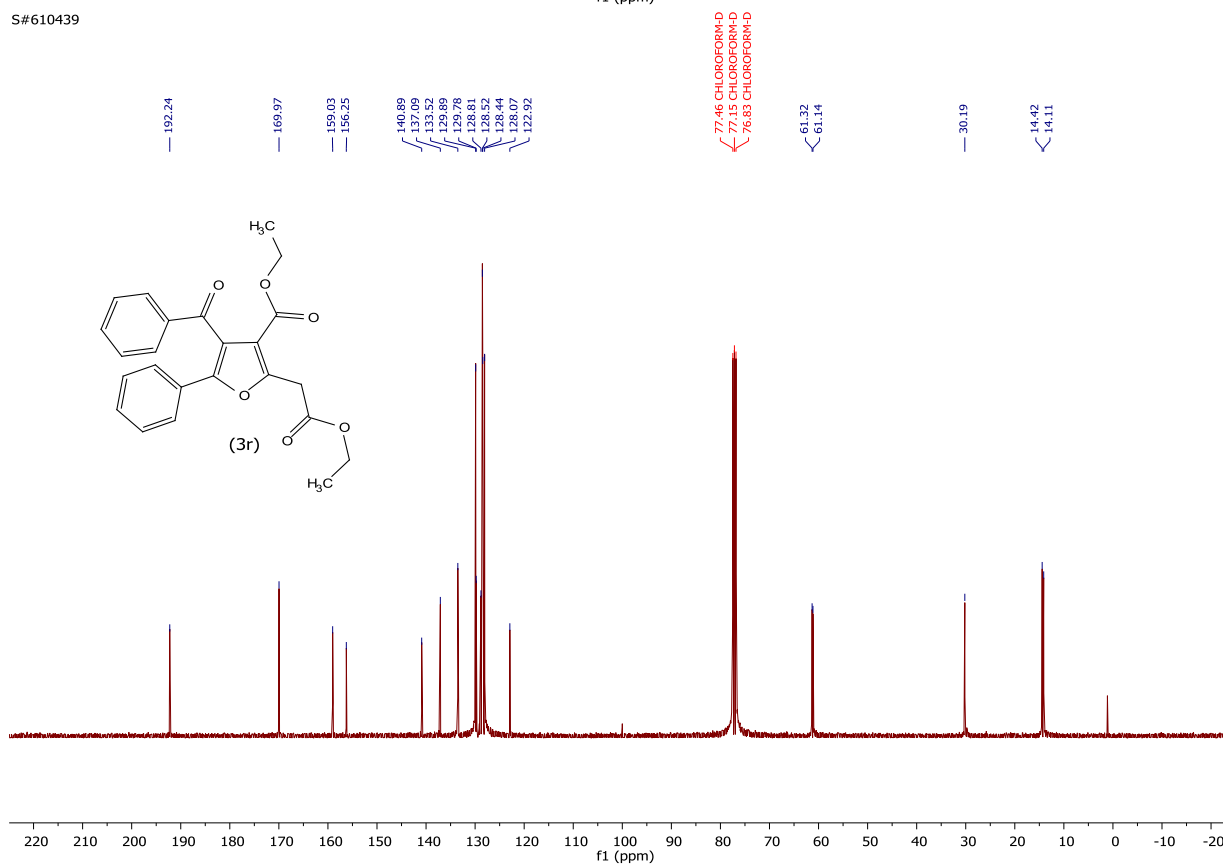

S#409880

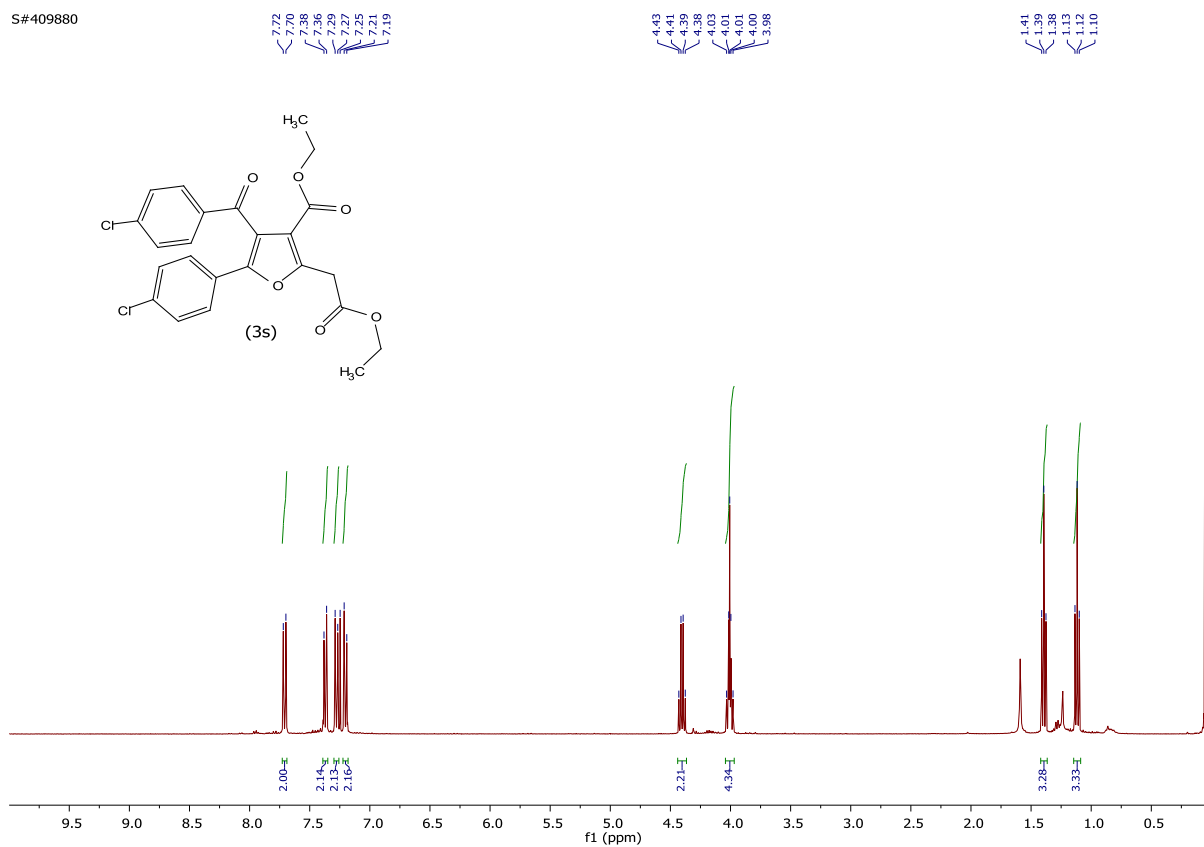

S#446456

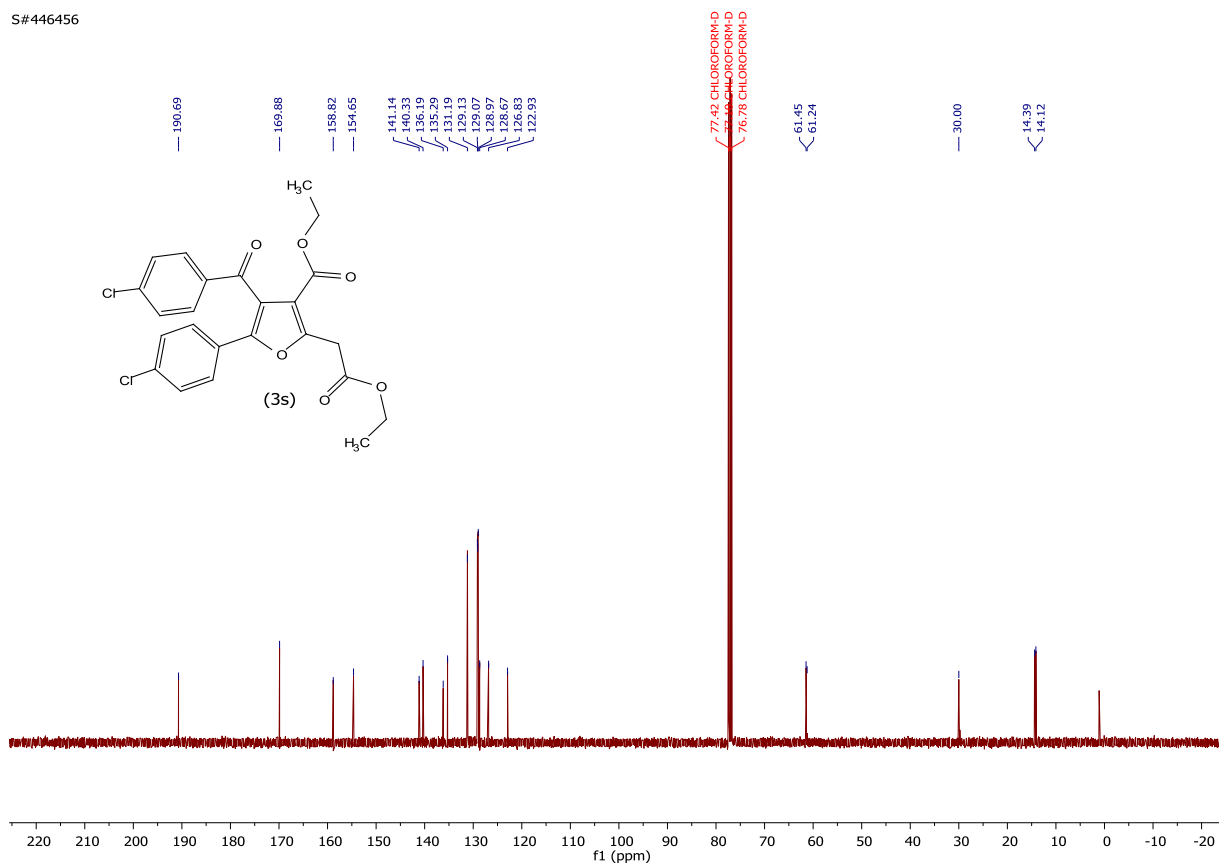

S#379562

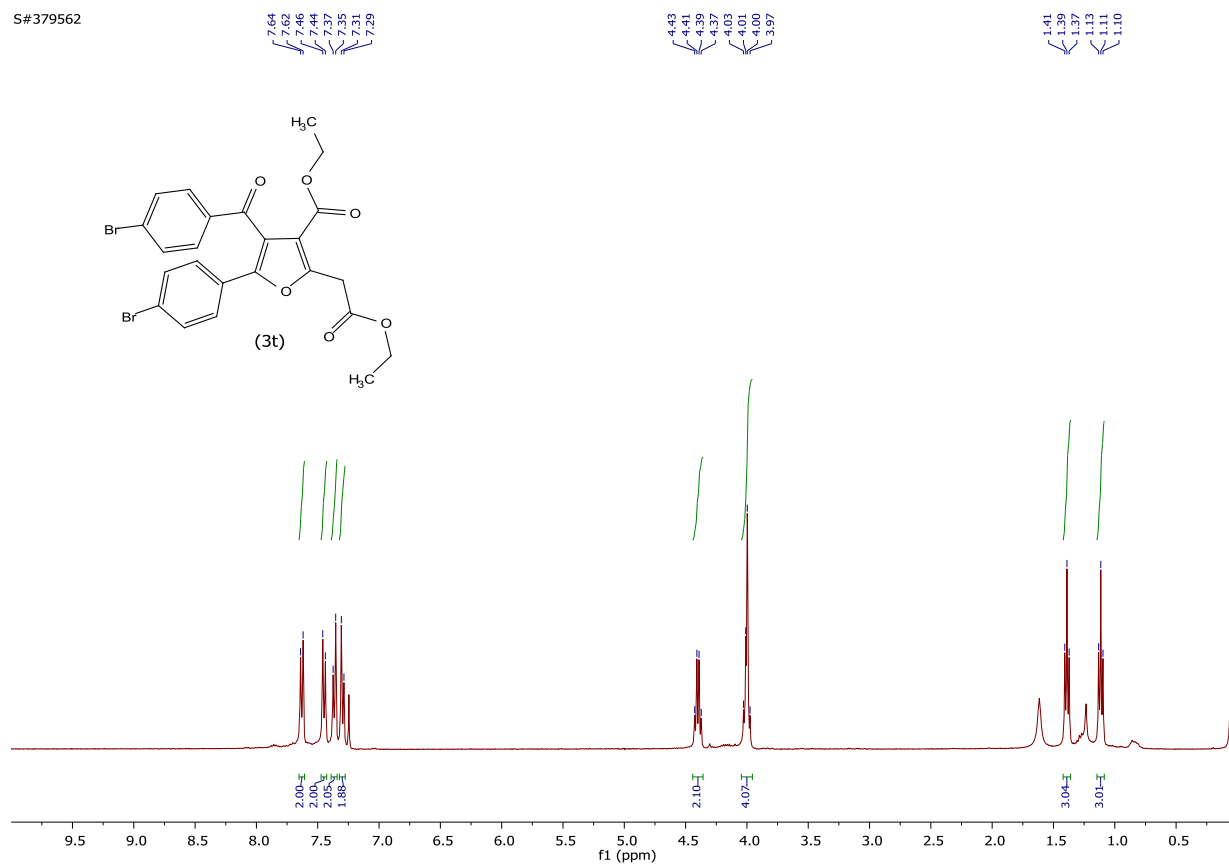

S#599743

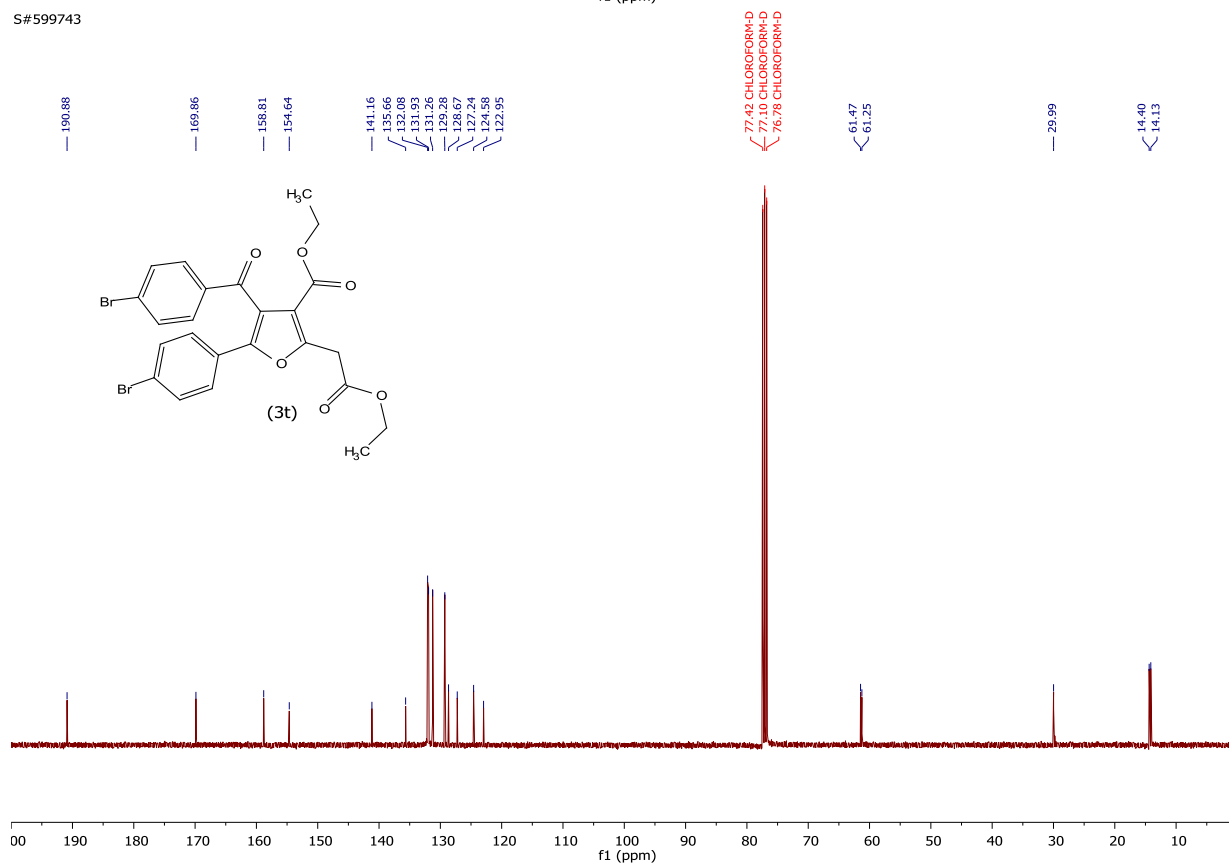

S#406034

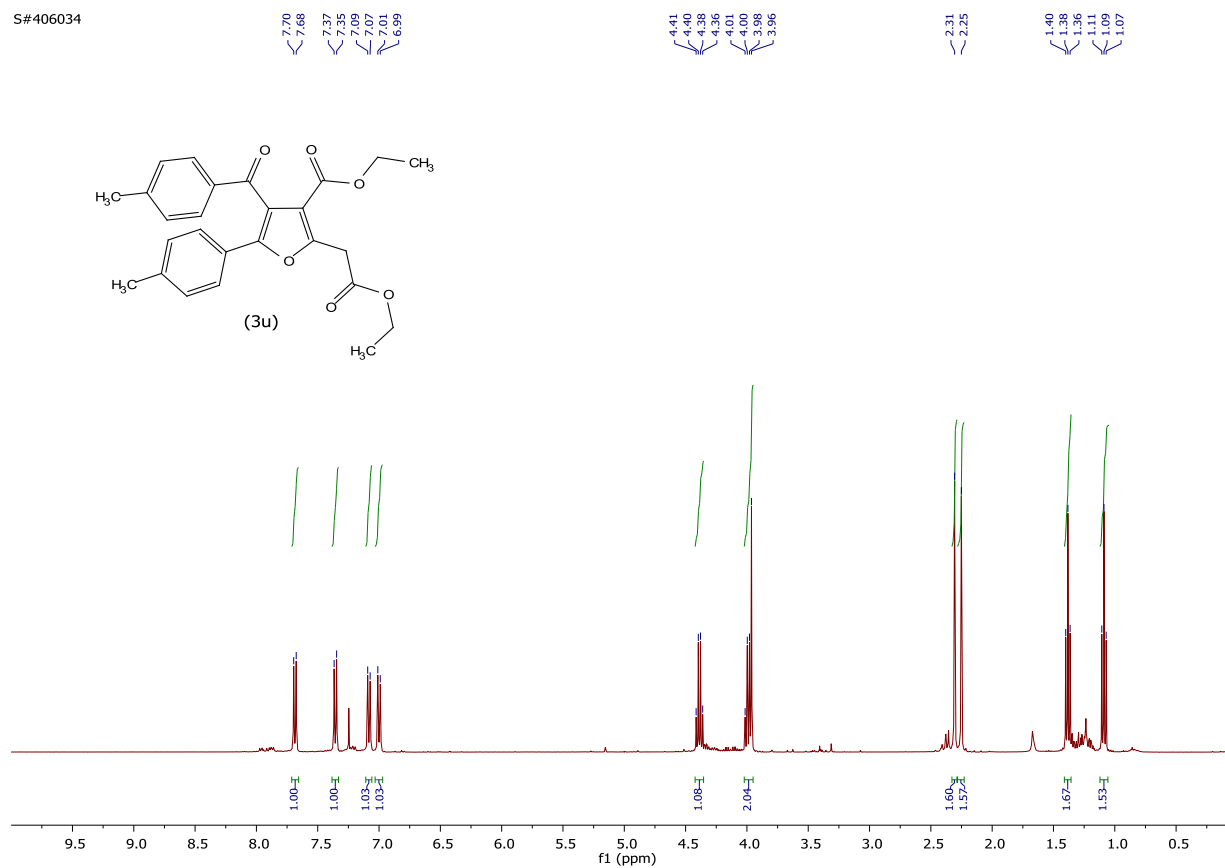

S#438051

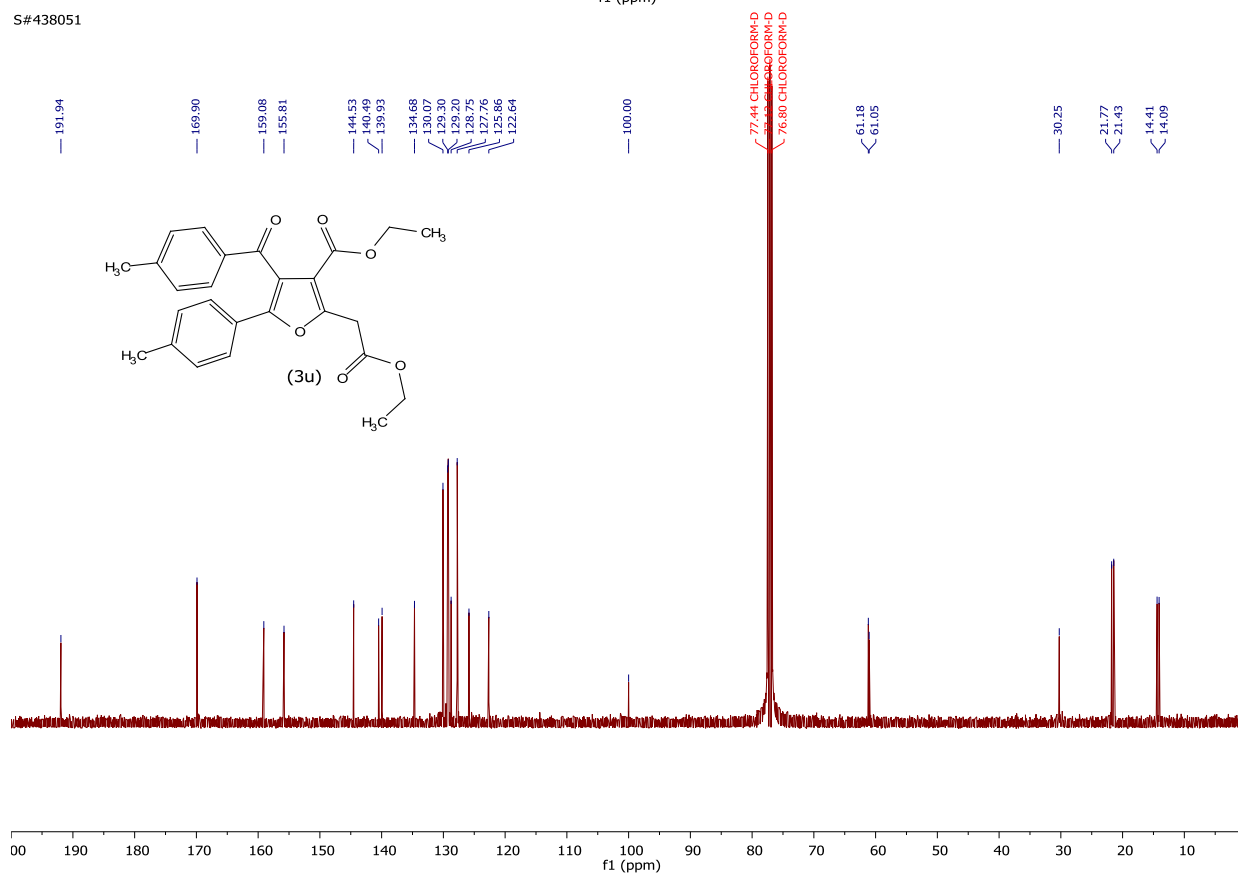

S#489268

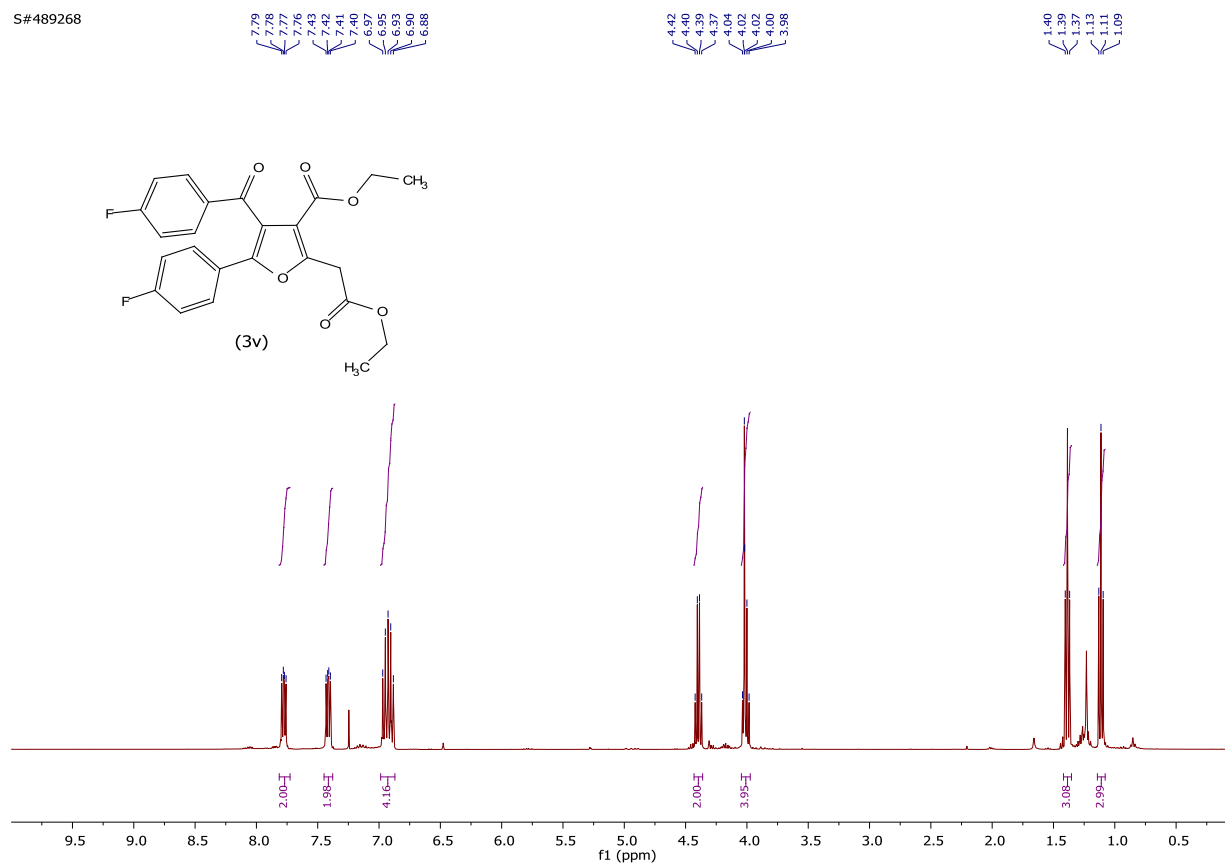

S#601615

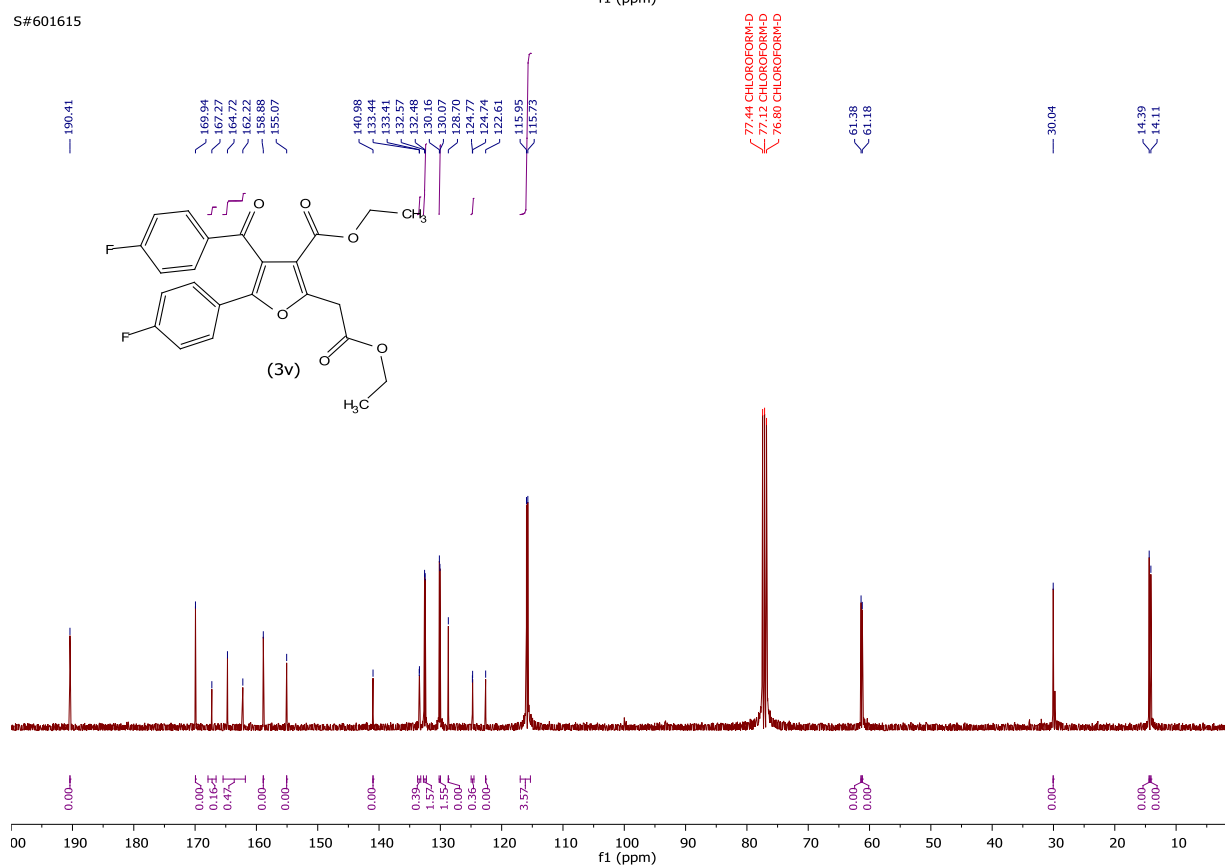



S#355863

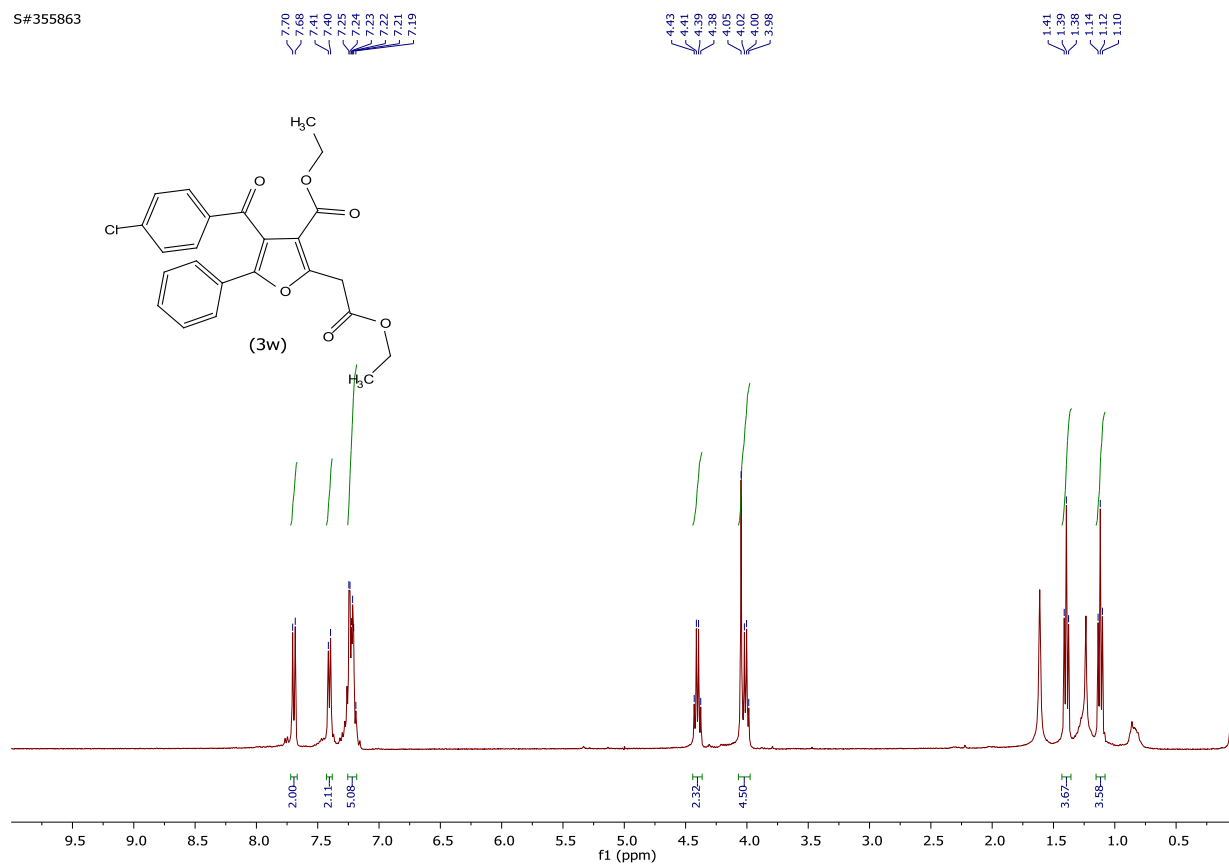

S#603487

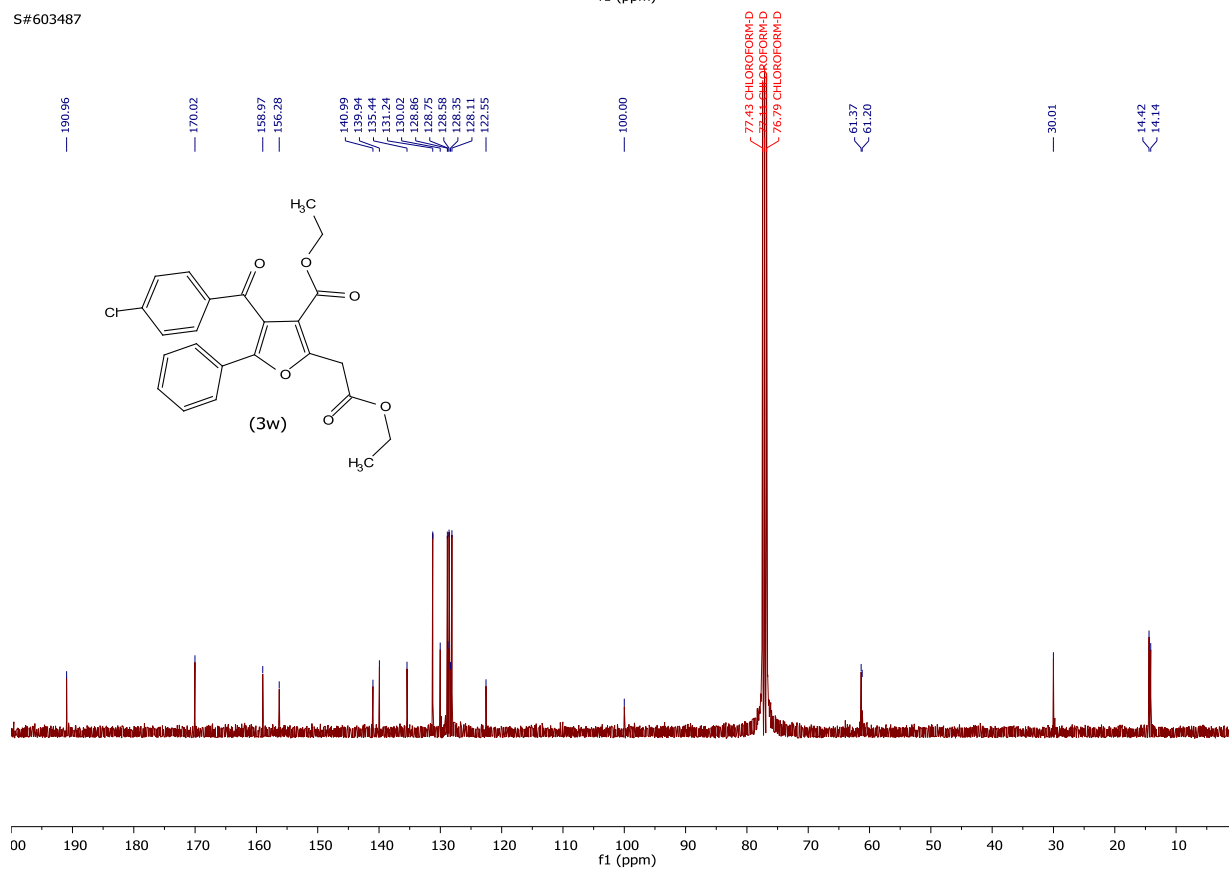

S#361933

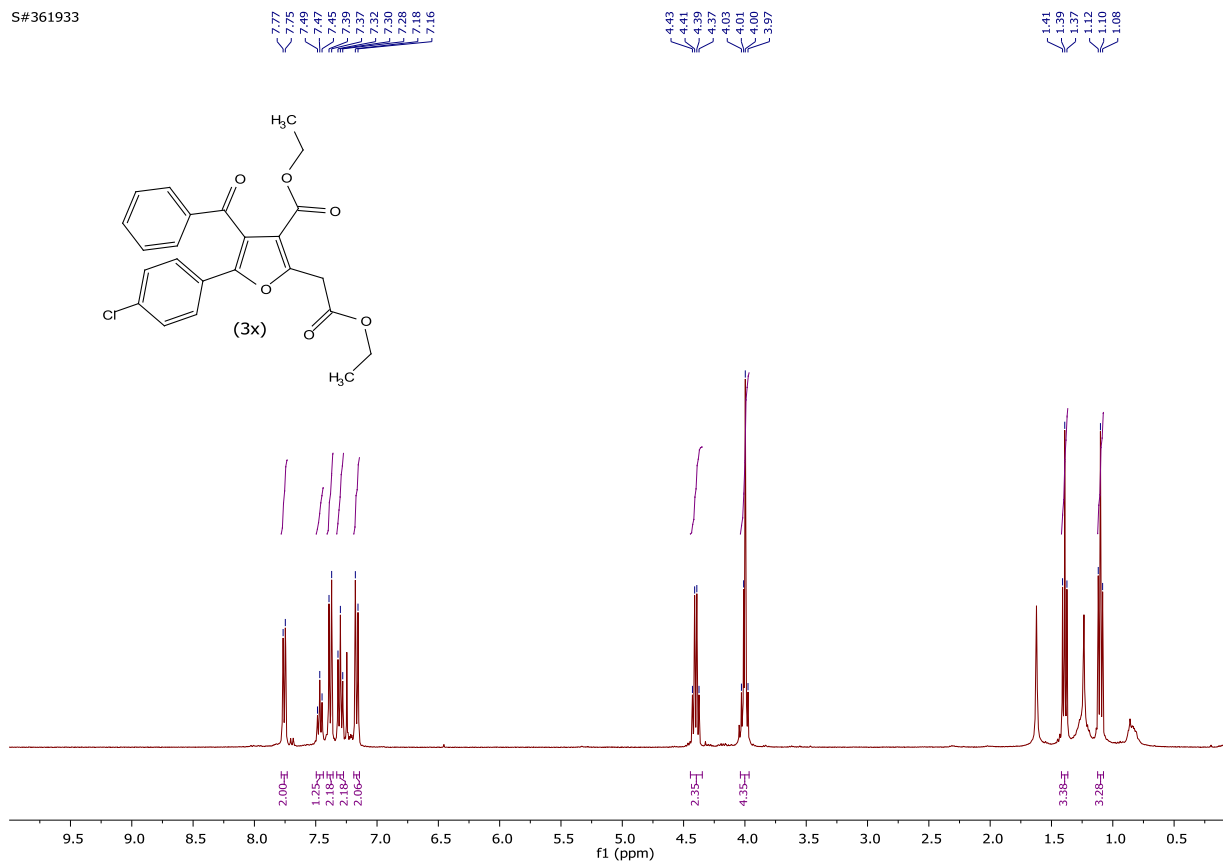

S#601415

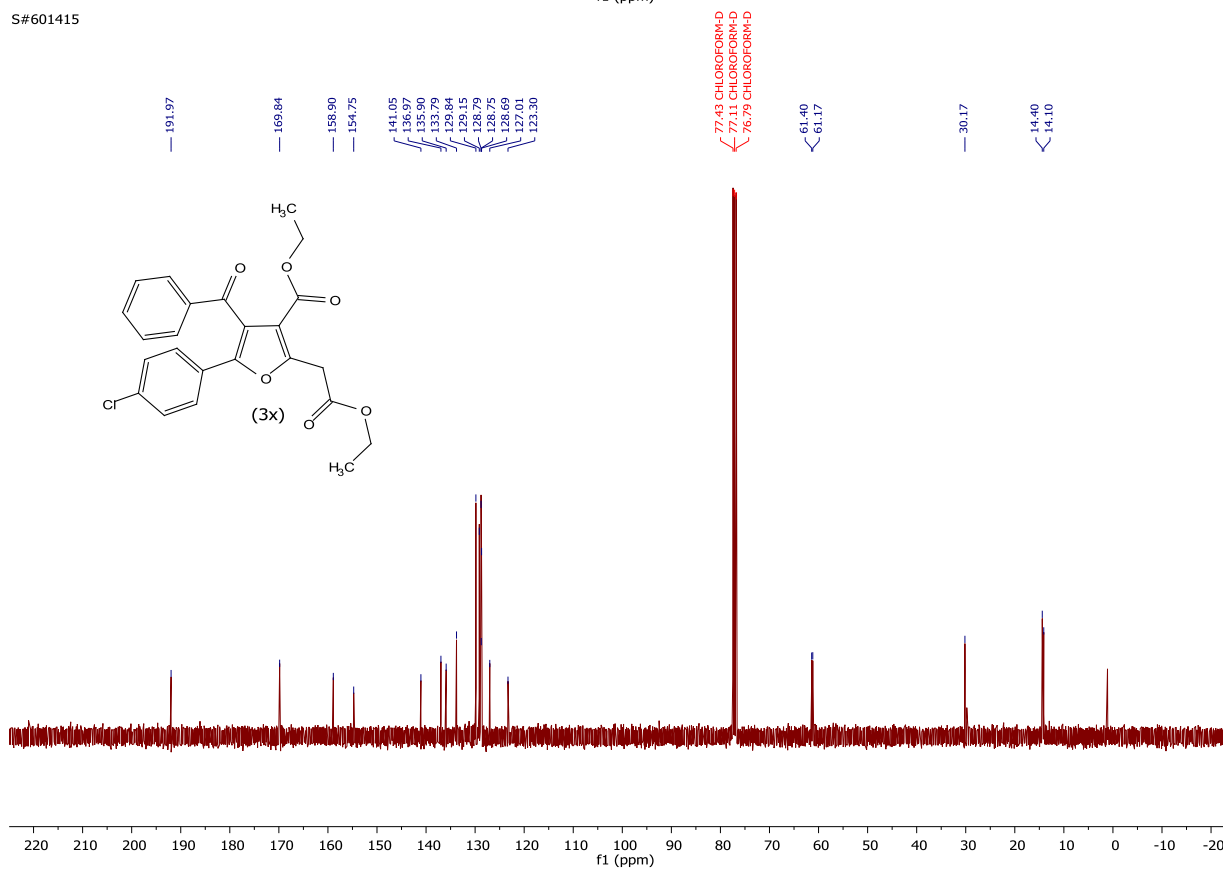

S#556557

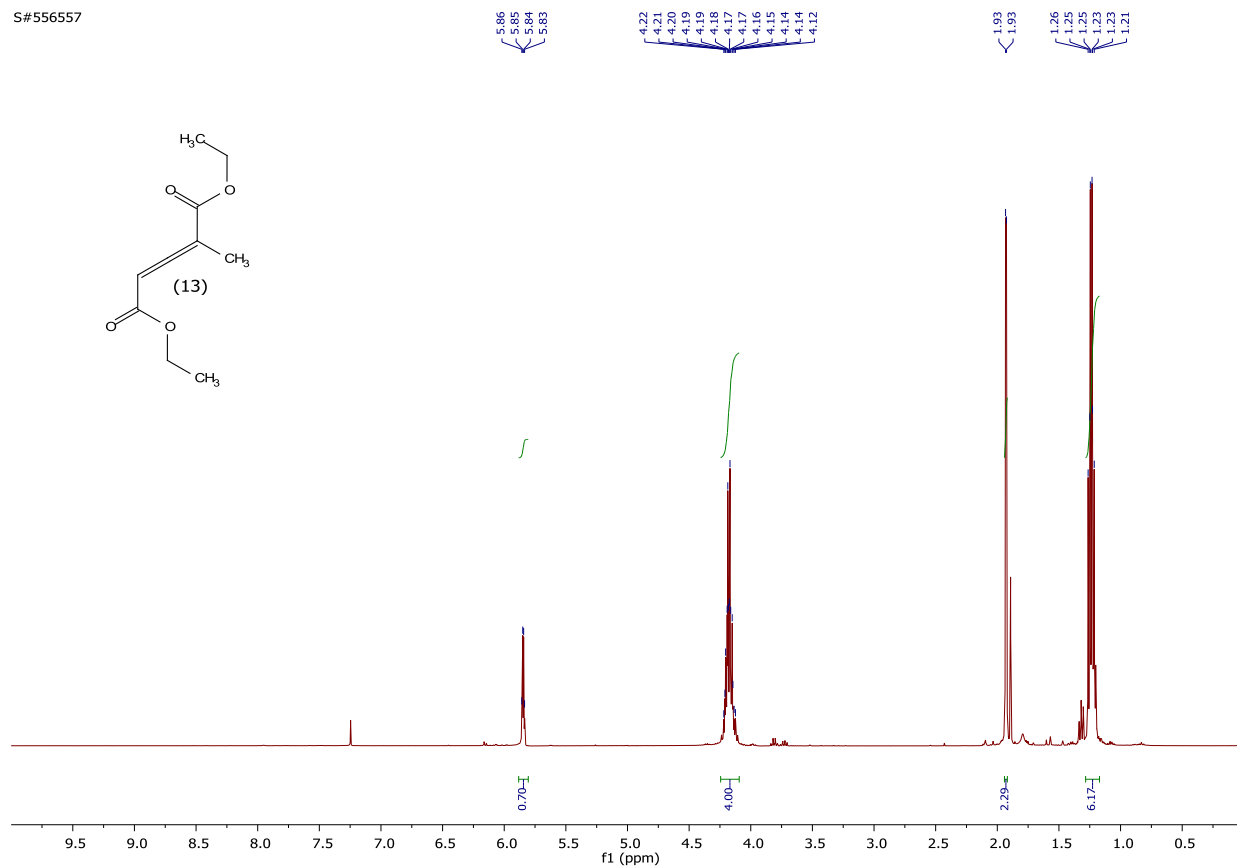

S#409411

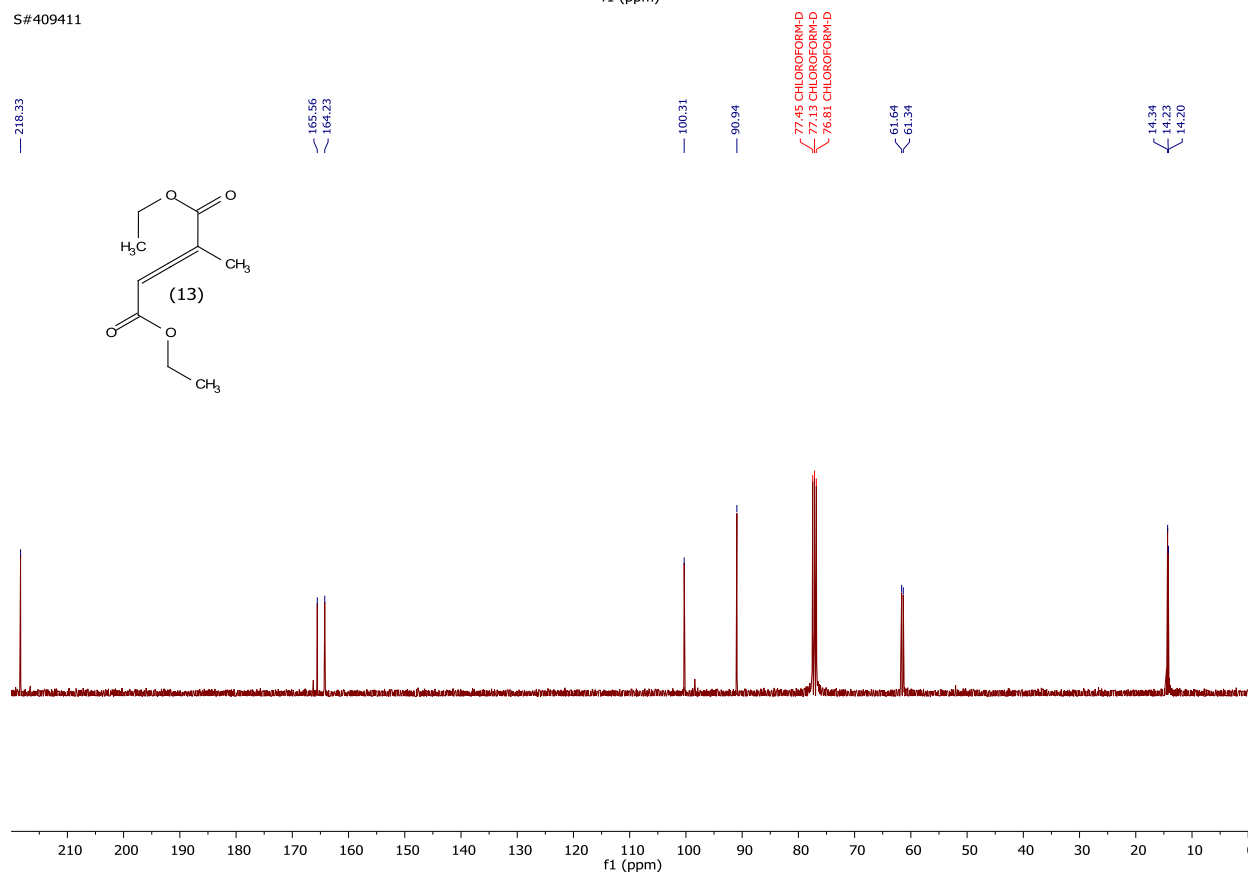

**Attempted synthesis of derivative 3p:** The synthesis of derivative 3o was attempted using general procedure B by employing both the bromo and iodo precursors. However, a complex mixture was obtained in all cases and no desired product could be obtained. The respective crude NMR's are appended below.

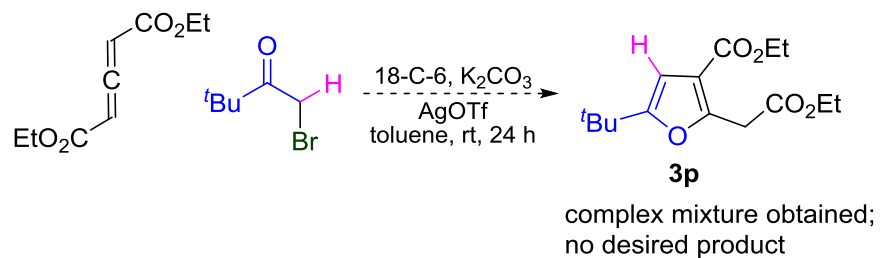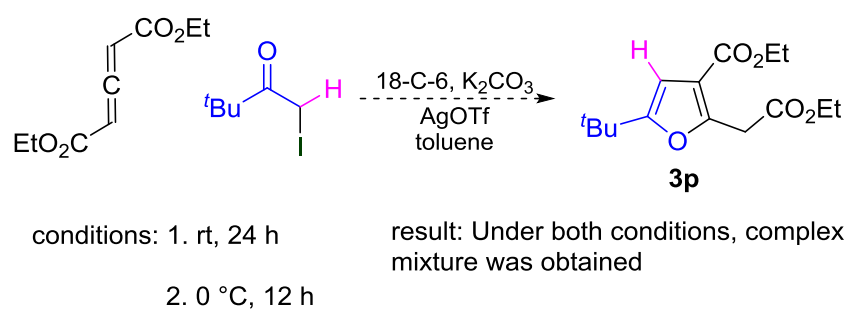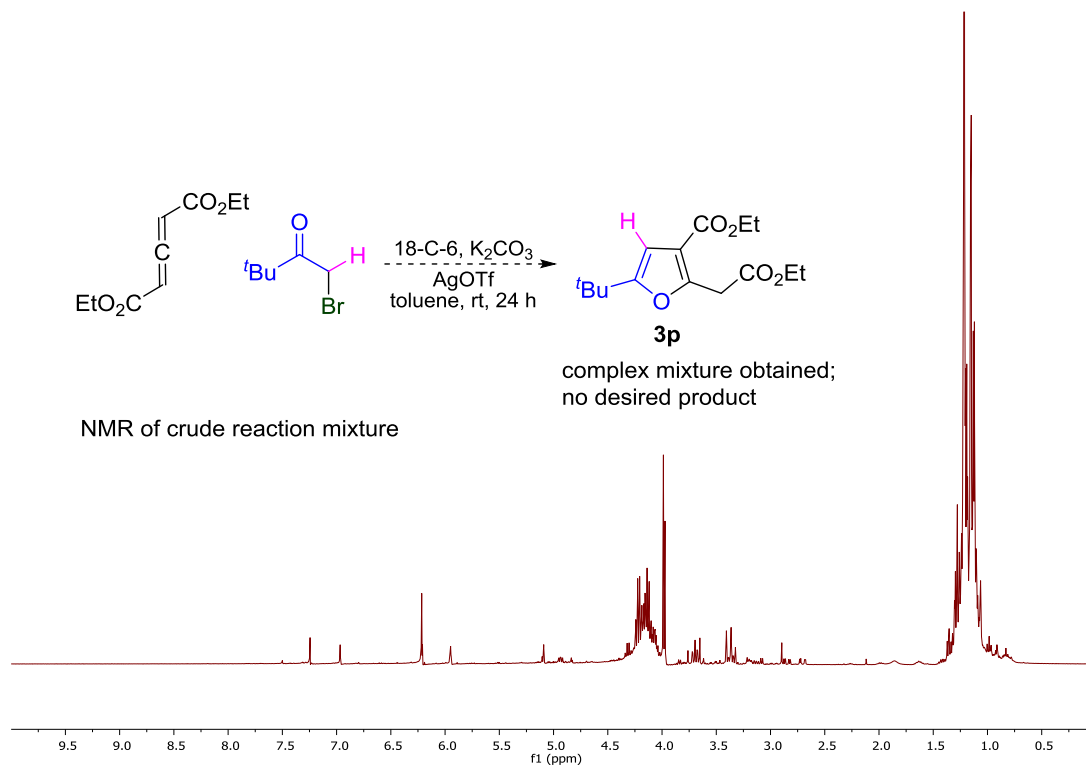

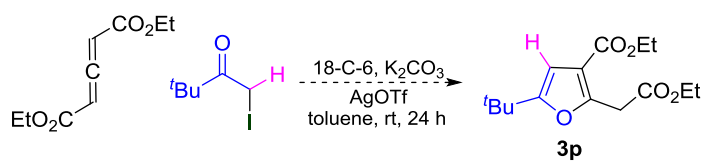

NMR of crude reaction mixture

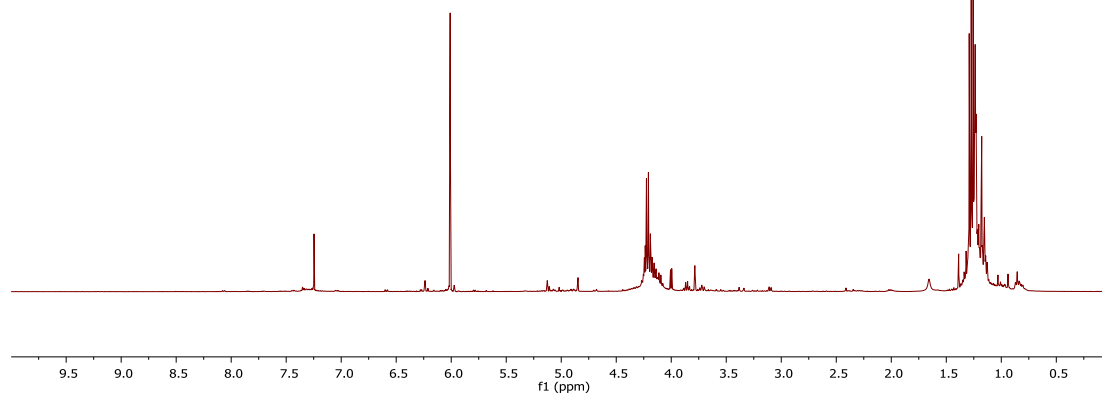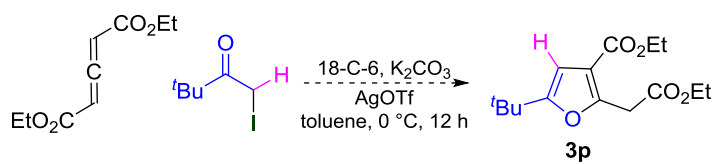

NMR of crude reaction mixture

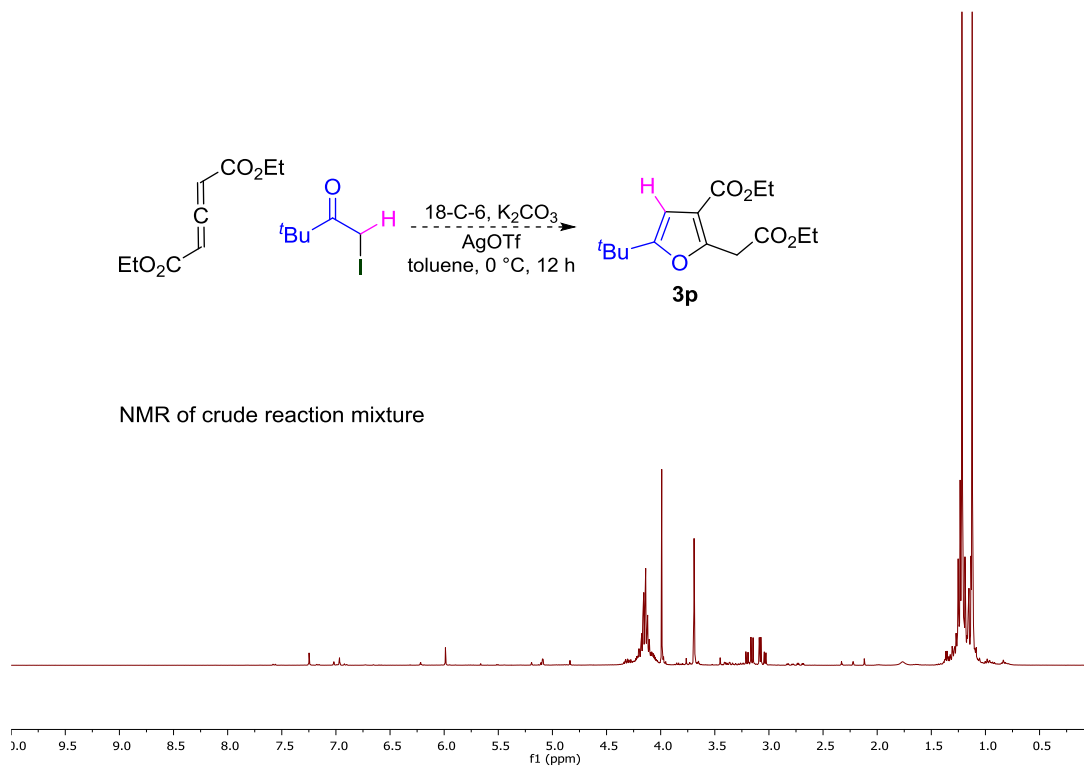

1. a) Angeles-Dunham, V. V.; Nickerson, D. M.; Ray, D. M.; Mattson, A, E. *Angew. Chem. Int. Ed.* **2014**, *53*, 14538; b Macharla, A. K.; Nappunni, R. C.; Marri, M. R.; Peraka, S.; Nama, N. *Tetrahedron Lett.* , **2012**, *53*, 191; c) Klahn, P; Erhardt, H.; Kotthaus, A.; and Kirsch, S. F. *Angew. Chem. Int. Ed.* **2014**, *53*, 7913; d) Wang, Z.; Yin, G.; Qin, J.; Gao, M.; Cao, L.; Wu, A. *Synthesis*, **2008**, *22*, 3675.
2. Node, M.; Fujiwara, T.; Ichihashi, S.; and Nishide, K. *Tetrahedron Lett.* **1998**, *39*, 6331.
3. Mbofana, C. T.; Miller, S. J. *J. Am. Chem. Soc.* **2014**, *136*(8), 3285.
